# Supplementary material for: Visible light-mediated copper catalyzed regioselective diamination of terminal alkynes at room temperature: a facile synthesis of substituted imidazo[1,2-α]pyridines
Source: Royal Society of Chemistry journal article supplement (doi:10.1039/d3gc04062c), 2023-12-21
Supplement: d3gc04062c1.pdf [file d3gc04062c1.pdf]

Supporting Information

## Visible Light-mediated Copper Catalyzed Regioselective Diamination of Terminal Alkynes at Room Temperature: A Facile Synthesis of Substituted Imidazo[1,2- $\alpha$ ]pyridine

Vaibhav Pramod Charpe, Mahima Gupta, and Kuo Chu Hwang\*

Department of Chemistry, National Tsing Hua University, Hsinchu, Taiwan, R. O. C.

E-mail: [kchwang@mx.nthu.edu.tw](mailto:kchwang@mx.nthu.edu.tw)

### Table of contents

|                                                                                                                                                                                                     |     |
|-----------------------------------------------------------------------------------------------------------------------------------------------------------------------------------------------------|-----|
| 1. Experimental section                                                                                                                                                                             | S3  |
| 2. Mechanistic studies <ul style="list-style-type: none"><li>• UV-visible spectra</li><li>• EPR measurements</li><li>• Detection of reaction intermediates</li><li>• Crossover experiment</li></ul> | S5  |
| 3. A gram scale reaction for the synthesis of compound <b>3</b>                                                                                                                                     | S13 |
| 4. Fluorescence quantum yield measurement                                                                                                                                                           | S13 |
| 5. Evaluation of E-factor of the reported thermal method                                                                                                                                            | S15 |
| 6. Photochemical reaction setup                                                                                                                                                                     | S18 |
| 7. Spectroscopic data: $^1\text{H}$ NMR, $^{13}\text{C}$ NMR, $^{19}\text{F}$ NMR, HRMS, and IR data                                                                                                | S19 |
| 8. Supporting references                                                                                                                                                                            | S35 |
| 9. $^1\text{H}$ NMR, $^{13}\text{C}$ NMR, and $^{19}\text{F}$ -NMR spectra                                                                                                                          | S36 |
| 10. ORTEP diagram and X-ray Data of compound <b>5</b>                                                                                                                                               | S70 |
| 11. ORTEP diagram and X-ray Data of compound <b>10</b>                                                                                                                                              | S84 |
| 12. ORTEP diagram and X-ray Data of compound <b>13</b>                                                                                                                                              | S91 |

|                                                        |      |
|--------------------------------------------------------|------|
| 13. ORTEP diagram and X-ray Data of compound <b>20</b> | S98  |
| 14. ORTEP diagram and X-ray Data of compound <b>27</b> | S107 |

## 1. Experimental section

**General:** All reactions were conducted in oven-dried glasswares using a blue light-emitting diode (LED) array (power density: 150 mW/cm<sup>2</sup> at 460 nm) as the visible-light source under an air (or O<sub>2</sub>) atmosphere. All solvents were dried according to known methods and distilled prior to use. Starting materials were commercially available (Sigma-Aldrich or Alfa Aesar or TCI-chemicals) and used as received. <sup>1</sup>H NMR and <sup>13</sup>C NMR spectra were recorded at 700/400 and 175/100 MHz, respectively, using deuterated CDCl<sub>3</sub> as a solvent. Chemical shifts (δ) were reported as parts per million (ppm) and the following abbreviations were used to identify the multiplicities: s= singlet, d= doublet, t= triplet, q= quartet, m= multiplet, b= broad and all combinations thereof can be explained by their integral parts. Unless otherwise specified, the proton/carbon signal of 2 residual solvent peaks (at δ 7.24 or 2.50 and δ 77.00 or 39.51 ppm, respectively) were used as the internal references.

### A. General procedure for the synthesis of substituted imidazo[1,2- $\alpha$ ]pyridine:

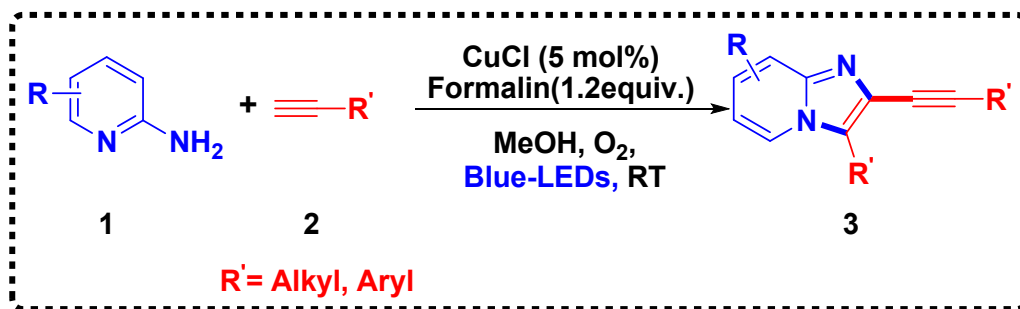

**Scheme S1:** Current photochemical process for the synthesis of substituted imidazo[1,2- $\alpha$ ]pyridine.

To a dry test tube (20 mL) containing 5 mol% CuCl and 2-aminopyridine (0.5 mmol) was added 5 mL of MeOH, followed by the addition of Formalin (37% in water) (0.6 mmol). The solution was stirred for 1 min and then terminal alkyne (1.1 mmol) was added to the solution. The reaction mixture was then irradiated with blue LEDs (150 mW/cm<sup>2</sup> at 460 nm) under oxygen atmosphere (O<sub>2</sub> balloon) at room temperature (25-28 °C) until completion of the reaction (monitored by TLC). The reaction mixture was then concentrated and the residue was purified by column chromatography on silica gel.

## B. Procedures for Synthetic transformations<sup>S1</sup>:

### 1) Synthesis of 1-phenyl-2-(3-phenylimidazo[1,2-a]pyridin-2-yl)ethane-1,2-dione

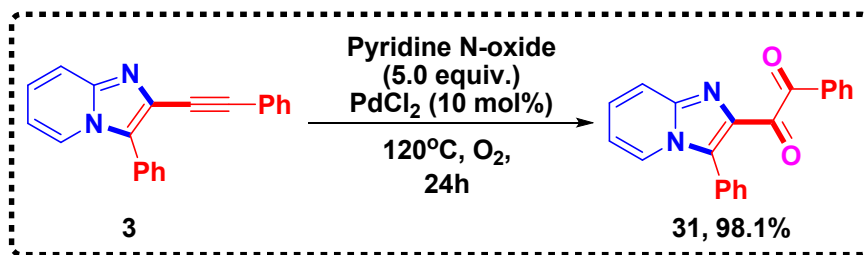

**Scheme S2:** Reaction scheme for the synthesis of 1-phenyl-2-(3-phenylimidazo[1,2-a]pyridin-2-yl)ethane-1,2-dione.

**Procedure:** A 50 mL round bottom flask was loaded with 295 mg of compound **3** (1.0 mmol). Followed by addition of 17.7 mg (10 mol%) of PdCl<sub>2</sub> and 475.5 mg of pyridine-N-oxide (5.0 equiv.). The reaction mixture was then stirred at 120°C for 24 hours under oxygen atmosphere. After completion of reaction (monitored by TLC), reaction mixture then extracted with DCM (2 x 50 mL) and the organic phase was wash with water, brine, dried over Na<sub>2</sub>SO<sub>4</sub>, and concentrated in vacuum to obtain the residue (product). This residue then purified by column chromatography on silica gel to collect the product **31** in 320 mg (98.1% yield).

### 2) Synthesis of 2-ethynylimidazo[1,2- $\alpha$ ]pyridine

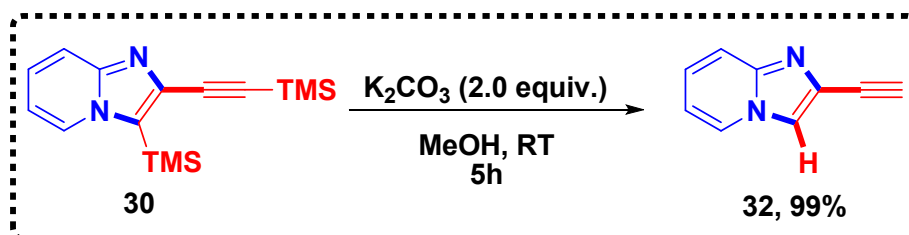

**Scheme S3:** Reaction scheme for the synthesis of 2-ethynylimidazo[1,2- $\alpha$ ]pyridine.

**Procedure:** In a 50 mL round bottom flask, 143 mg (0.5 mmol) of compound **30** was dissolved in 10 mL methanol. The mixture was stirred for 5 h at room temperature. After completion of reaction (monitored by TLC), reaction mixture then extracted with EA (2 x 50 mL) and the organic phase was wash with water, brine, dried over Na<sub>2</sub>SO<sub>4</sub>, and concentrated in vacuum to directly afford the pure product **32** in 70.3 mg (99.02% yield).

**C. Preparation of copper(I)-phenylacetylide:**<sup>S2,S3</sup> CuI (1.0 g, 5.0 mmol) was dissolved in ammonium hydroxide to form a blue-colored solution. While stirring, phenylacetylene (0.5 g, 5.1 mmol in 50 mL ethanol) was added drop wise to the solution. The system was allowed to stand for 15 min to form a yellow precipitate suspension. The precipitate was filtered out and washed with water, ethanol, and diethyl ether, three times each. The solid was vacuum-dried, and a bright yellow solid was obtained in 64% yield. The spectroscopic data: IR (KBr,  $\text{cm}^{-1}$ )<sup>S4</sup> 1929 ( $\text{C}\equiv\text{C}$ ), 1596, 1568; UV-Vis  $\lambda_{\text{abs}} = 472$  nm.

The bond order in  $\text{C}\equiv\text{C}$  triple bond of copper phenylacetylide<sup>S4</sup> = 2.63, which is due to the electron-withdrawing character of Cu(I) in copper phenylacetylide and thus weakening of the adjacent  $\text{C}\equiv\text{C}$  triple bond.

## 2. Mechanistic studies

### A) UV-visible spectra:

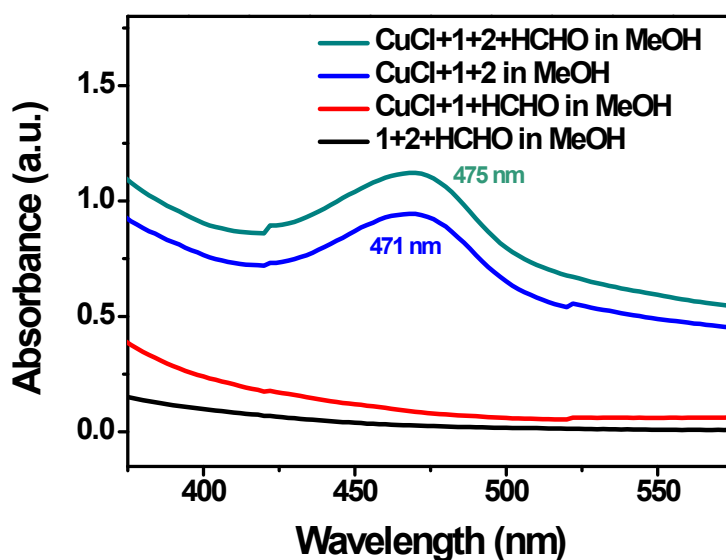

**Figure S1.** UV-visible absorption spectra of the reaction mixture in MeOH.

**B) EPR measurements:**

EPR spectra were recorded at room temperature on a Bruker ESP-300E (X band, 9.8 GHz) with parameters setting as shown below: receiver gain= 30 n; receiver phase= 0 deg; receiver harmonic=1; field modulation frequency=100000 Hz; microwave frequency[Hz]=  $9.660469e^{+09}$ ; field modulation amplitude [T]= 0.00016; receiver time constant [S] = 0.32768; microwave power= 0.015 W; receiver offset [%FS]=0; DMPO (5-,5-dimethyl-1-pyrroline N-oxide) was employed as a radical trap for superoxide.

The reaction under standard condition (2-aminopyridine (**1**), Phenylacetylene (**2**), formalin, CuCl, O<sub>2</sub>) in MeOH was irradiated with blue LED light for 30 min in the presence of DMPO in an EPR chamber while recording the EPR spectra. The EPR signals shown in **Figure S2** is corresponding to DMPO-OO(H). This result indicates that superoxide free radical was formed in the reaction. This result indicates that photoexcited copper(I)-phenylacetylide undergoes single electron transfer to O<sub>2</sub> and generates superoxide free radical upon blue LEDs irradiation.

## EPR spectra of the reaction mixture after blue LEDs irradiation

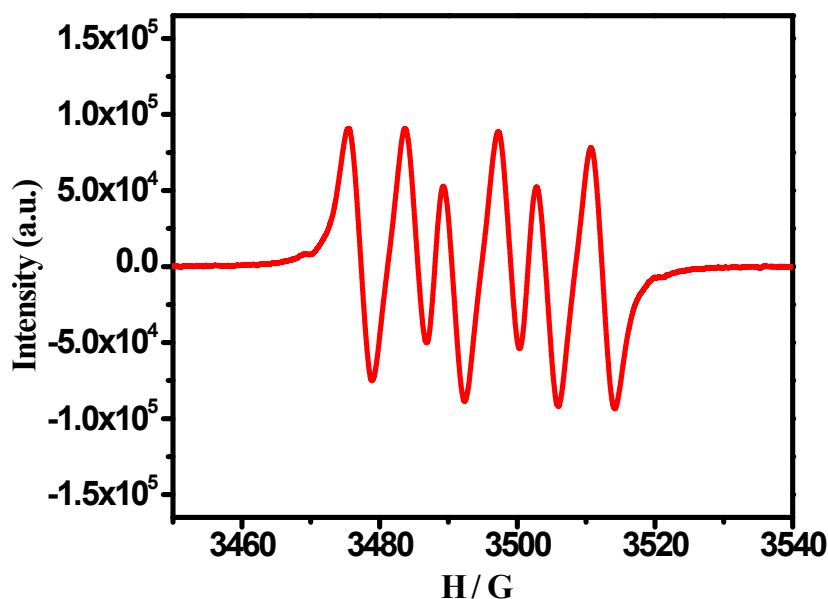

**Figure S2:** EPR spectra of the reaction mixture: 2-aminopyridine (**1**) (0.5 mmol), phenylacetylene (**2**) (1.1 mmol), formalin (1.2 equiv.) and 5 mol% of CuCl in MeOH (5 mL), 0.5 mL of this reaction solution was taken out into a small vial, followed by the addition of 0.01 mL of DMPO ( $5 \times 10^{-2}$  M). The mixture was irradiated with blue LEDs at room temperature under an oxygen atmosphere (1 atm) for 30 minutes. The reaction mixture was then analyzed by EPR. The 6 classical peaks are corresponding to DMPO-OO(H).

**C) Detection of intermediates by ESI-MS:**

The standard reaction was performed for short period of 8 h to detect the reaction intermediate, and the reaction mixture was then analyzed by ESI-MS. The possible intermediates were detected by mass. The detected intermediates are shown in **Scheme S4** below.

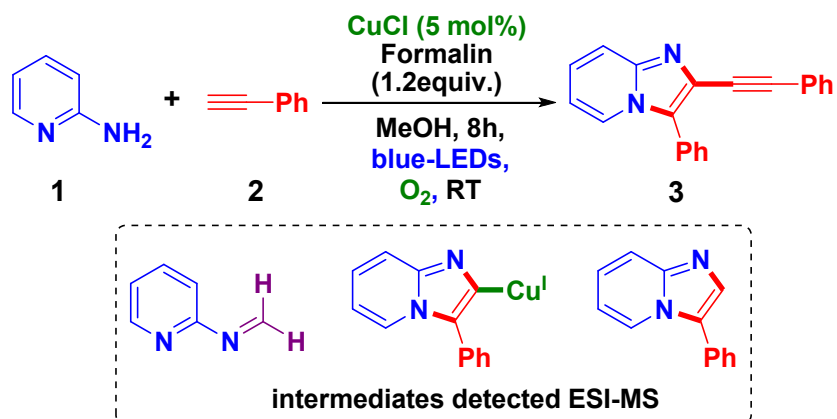

**Scheme S4:** Detection of intermediates by ESI-MS.



# ESI Mass Data

Data: AP-65  
 Comment:  
 Description:  
 Ionization Mode: ESI+  
 History: Average(MS[1] 0.40..0.43)

Acquired: 7/3/2023 4:29:03 PM  
 Operator: AccuTOF  
 m/z Calibration File: 20230608-TFANA\_...  
 Created: 10/13/2023 3:17:23 PM  
 Created by: AccuTOF

Charge number: 1  
 Element: <sup>12</sup>C: 6 .. 21, <sup>1</sup>H: 7 .. 15, <sup>14</sup>N: 2 .. 2, <sup>23</sup>Na: 0 .. 0  
 Tolerance: 3.50[ppm].. 3.50 .. 3.50[mDa]      Unsaturation Number: -300.5 .. 300.0 (...)

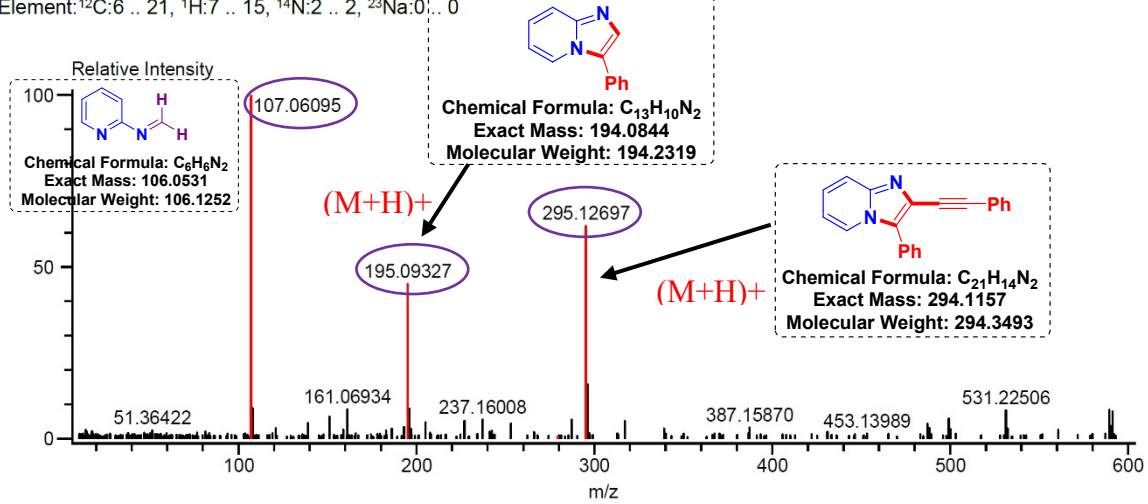

| Mass      | Intensity | Calc. Mass | Mass Difference [mDa] | Mass Difference [ppm] | Possible Formula                                                                        |
|-----------|-----------|------------|-----------------------|-----------------------|-----------------------------------------------------------------------------------------|
| 107.06095 | 21200.81  | 107.06092  | 0.03                  | 0.26                  | <sup>12</sup> C <sub>6</sub> <sup>1</sup> H <sub>7</sub> <sup>14</sup> N <sub>2</sub>   |
| 195.09327 | 9523.02   | 195.09222  | 1.05                  | 5.36                  | <sup>12</sup> C <sub>13</sub> <sup>1</sup> H <sub>11</sub> <sup>14</sup> N <sub>2</sub> |
| 279.48786 | 135.16    |            |                       |                       |                                                                                         |
| 295.12697 | 13110.94  | 295.12352  | 3.45                  | 11.68                 | <sup>12</sup> C <sub>21</sub> <sup>1</sup> H <sub>15</sub> <sup>14</sup> N <sub>2</sub> |

## ESI Mass Data

Data: AP-66R  
 Comment:  
 Description:  
 Ionization Mode: ESI+  
 History: Average(MS[1] 0.22..0.82)

Acquired: 8/23/2023 5:12:01 PM  
 Operator: AccuTOF  
 m/z Calibration File: 20230710-TFANA\_...  
 Created: 10/13/2023 5:07:50 PM  
 Created by: AccuTOF

Charge number: 1      Tolerance: 200.00[ppm], 200.00 .. 200....      Unsaturation Number: -300.5 .. 300.0 (...)  
 Element: <sup>12</sup>C: 13 .. 13, <sup>1</sup>H: 0 .. 11, <sup>63</sup>Cu: 1 .. 1, <sup>14</sup>N: 2 .. 2, <sup>23</sup>Na: 0 .. 1

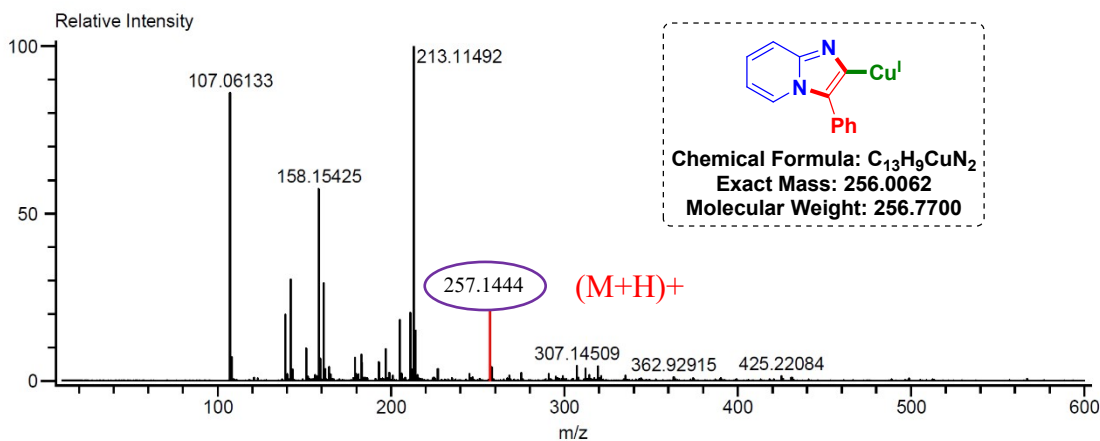

| Mass      | Intensity | Calc. Mass | Mass Difference [mDa] | Mass Difference [ppm] | Possible Formula                                                                                                      |
|-----------|-----------|------------|-----------------------|-----------------------|-----------------------------------------------------------------------------------------------------------------------|
| 257.14117 | 34725.51  | 257.01400  | 127.17                | 494.78                | <sup>12</sup> C <sub>13</sub> <sup>1</sup> H <sub>10</sub> <sup>63</sup> Cu <sub>1</sub> <sup>14</sup> N <sub>2</sub> |

Data: AP-66R  
 Comment:  
 Description:  
 Ionization Mode: ESI+  
 History: Average(MS[1] 0.22..0.82)

Acquired: 8/23/2023 5:12:01 PM  
 Operator: AccuTOF  
 m/z Calibration File: 20230710-TFANA\_...  
 Created: 10/13/2023 5:07:50 PM  
 Created by: AccuTOF

Charge number: 1      Tolerance: 200.00[ppm], 200.00 .. 200....      Unsaturation Number: -300.5 .. 300.0 (...)  
 Element: <sup>12</sup>C: 13 .. 13, <sup>1</sup>H: 0 .. 11, <sup>63</sup>Cu: 1 .. 1, <sup>14</sup>N: 2 .. 2, <sup>23</sup>Na: 0 .. 1

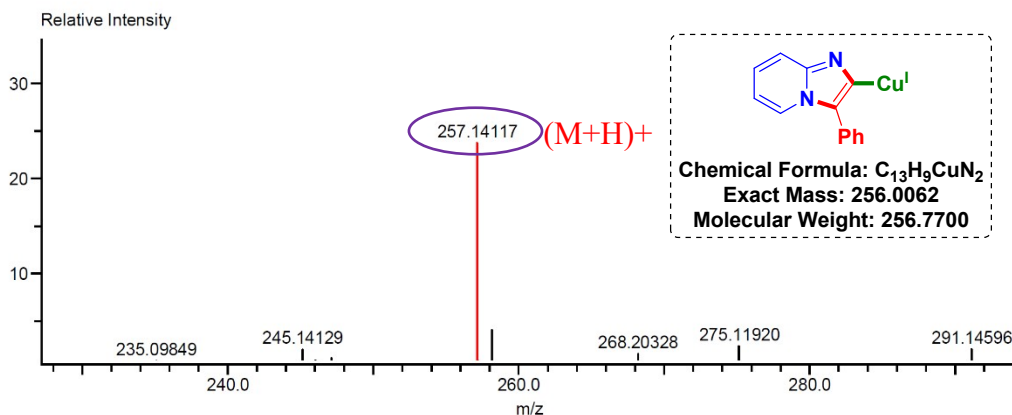

| Mass      | Intensity | Calc. Mass | Mass Difference [mDa] | Mass Difference [ppm] | Possible Formula                                                                                                      |
|-----------|-----------|------------|-----------------------|-----------------------|-----------------------------------------------------------------------------------------------------------------------|
| 257.14117 | 34725.51  | 257.01400  | 127.17                | 494.78                | <sup>12</sup> C <sub>13</sub> <sup>1</sup> H <sub>10</sub> <sup>63</sup> Cu <sub>1</sub> <sup>14</sup> N <sub>2</sub> |

**D) Crossover experiment:**

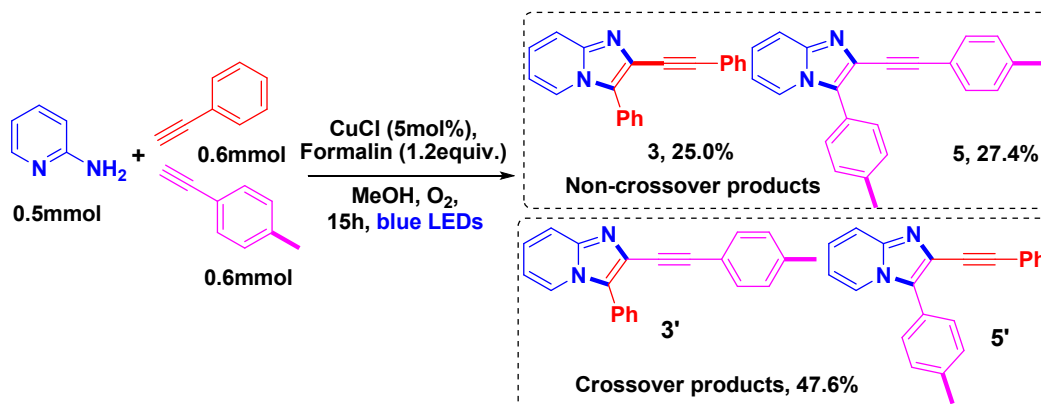

**Scheme S5:** Crossover experiment

In a crossover experiment, a mixture of alkynes, phenylacetylene (0.6 mmol) and 1-ethynyl-4-methylbenzene (0.6 mmol) was reacted with 2-aminopyridine (0.5 mmol) in the presence of formalin, CuCl and in MeOH solvent (5 mL) under visible light irradiation for 15 h. This reaction generated a mixture of non-crossover products **3** and **5** in 25% and 27.4% yields, respectively. Whereas crossover products **3'** and **5'** were obtained in an overall yield of 47.6%. Yields of these crossover experiment products were calculated based on the mass data, as the purification of this mixture of products is quite difficult.

This experiment concludes that (a) copper phenylacetylidyne is responsible for the formation of the desired product; (b) electron-donating terminal alkynes favours the formation of imidazopyridine product in slightly higher yield than that of electron-neutral alkynes (the product **5** was formed in slightly higher yield than that of the product **3**); and (c) we anticipate that the formation of crossover products dominate due to the electronegativity difference between terminal alkynes.

# ESI Mass Data

Data: AP-95  
 Comment:  
 Description:  
 Ionization Mode: ESI+  
 History: Average(MS[1] 0.23..1.01)

Acquired: 10/12/2023 11:50:37 AM  
 Operator: AccuTOF  
 m/z Calibration File: 20231012-TFANA\_...  
 Created: 10/13/2023 5:03:59 PM  
 Created by: AccuTOF

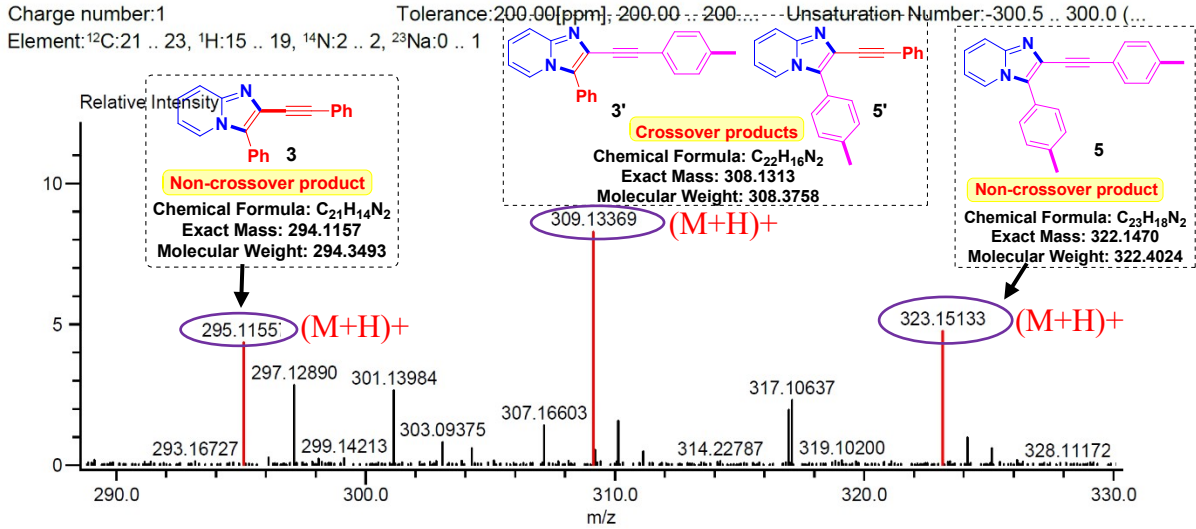

| Mass      | Intensity | Calc. Mass | Mass Difference [mDa] | Mass Difference [ppm] | Possible Formula                                                                        |
|-----------|-----------|------------|-----------------------|-----------------------|-----------------------------------------------------------------------------------------|
| 295.11557 | 1016.66   | 295.12352  | -7.95                 | -26.94                | <sup>12</sup> C <sub>21</sub> <sup>1</sup> H <sub>15</sub> <sup>14</sup> N <sub>2</sub> |
| 309.13369 | 1933.46   | 309.13917  | -5.48                 | -17.74                | <sup>12</sup> C <sub>22</sub> <sup>1</sup> H <sub>17</sub> <sup>14</sup> N <sub>2</sub> |
| 323.15133 | 1112.12   | 323.15482  | -3.49                 | -10.81                | <sup>12</sup> C <sub>23</sub> <sup>1</sup> H <sub>19</sub> <sup>14</sup> N <sub>2</sub> |

### 3. A gram scale reaction for the synthesis of compound 3.

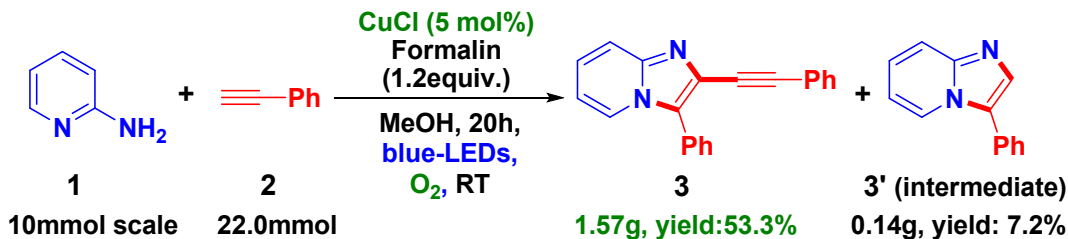

**Scheme S6:** A gram scale reaction for the synthesis of compound 3.

To a dry round bottom flask (50 mL, with magnetic stir bar) containing 5 mol% CuCl and 2-aminopyridine (**1**) (0.94 g, 10 mmol) was added 20 mL of MeOH, followed by the addition of Formalin (37% in water) (12.0 mmol). The solution was stirred for 1 min and then phenylacetylene (**2**) (2.25 g, 22 mmol) was added to the solution. The reaction mixture was then irradiated for 20 h (until completion of the reaction, monitored by TLC) with blue LEDs (150 mW/cm<sup>2</sup> at 460 nm) under oxygen atmosphere (O<sub>2</sub> balloon) at room temperature (25-28 °C). The reaction mixture was then concentrated and the residue was purified by column chromatography on silica gel. Solvent system: Ethyl acetate (EA): n-Hexane in the ratio of 1:9 to 2:8.

### 4. Fluorescence quantum yield calculations

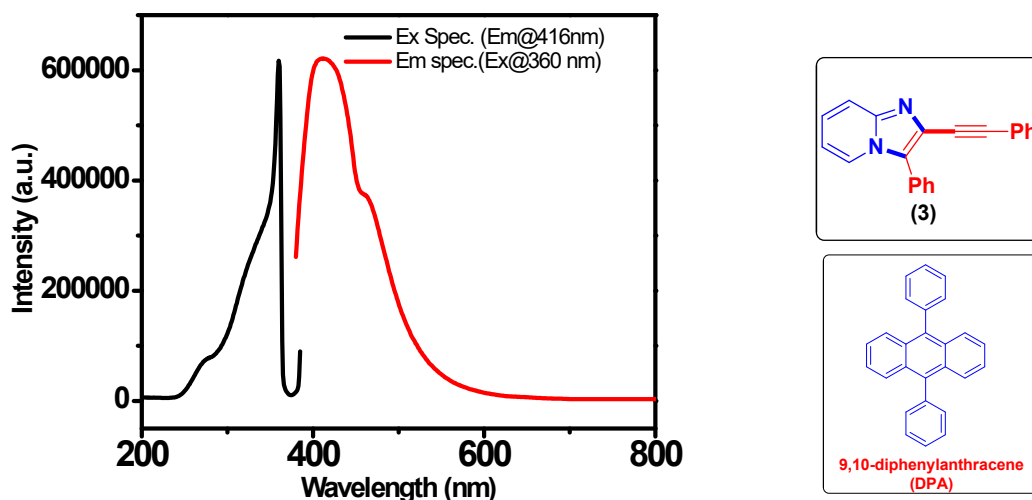

**Figure S3:** Emission and excitation spectra of the compound 3.

### Fluorescence quantum yield measurement

2, 3- disubstituted imidazo[1,2- $\alpha$ ]pyridine (only aromatic substituents) compounds show blue fluorescence upon UV light photoexcitation, and thus, we have measured the fluorescence quantum yield ( $\Phi_F$ ) for the compound **3** (3-phenyl-2-(phenylethynyl)imidazo[1,2- $\alpha$ ]pyridine) using 9,10- diphenylanthracene (DPA)<sup>S5</sup> as a fluorescence standard reference in methanol.

$$\text{Area}_{\text{DPA}(425-525\text{nm})} = \text{Ab}_{\text{DPA}} \times \text{I}_{300} \times \Phi_{\text{F,DPA}} \dots\dots\dots (1)$$

$$\text{Area}_{\text{DPA}(425-525\text{nm})} = 75531211$$

$$\text{Ab}_{300\text{nm}} = 0.043$$

$$\text{I}_{300\text{nm}} = 2 \text{ mW/cm}^2$$

$$\Phi_{\text{F,DPA}} = 0.9$$

Similar equation can be derived for the compound **3**

$$\text{Area}_{\text{Comp 3}(425-525\text{nm})} = \text{Ab}_{360} \times \text{I}_{360} \times \Phi_{\text{Comp 3}} \dots\dots\dots (2)$$

$$\text{Area}_{\text{Comp 3}(425-525\text{nm})} = 60119162.5$$

$$\text{Ab}_{360} = 0.08$$

$$\text{I}_{360} = 2 \text{ mW/cm}^2$$

After substituting all the parameters and dividing equations (1)/(2), one can obtain the value of  $\Phi_{\text{F Comp 3}}$  to be

$$\Phi_{\text{F.Comp 3}} = 0.385$$

## 5. Evaluation of E-factor of the reported thermal method<sup>S6</sup>

### A. Evaluation of E-factor of the reported thermal reaction (Step 1)

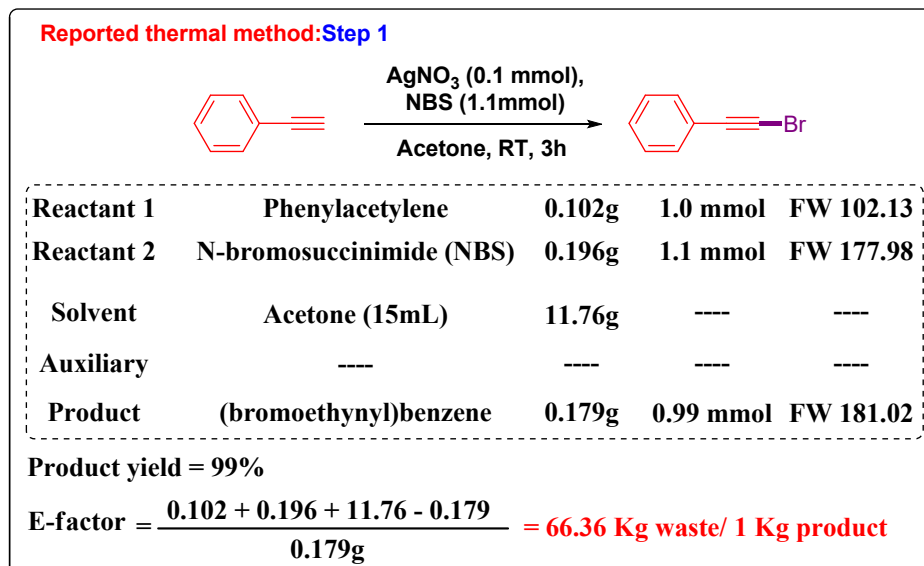

### B. Evaluation of E-factor of the reported thermal reaction (Step 2)

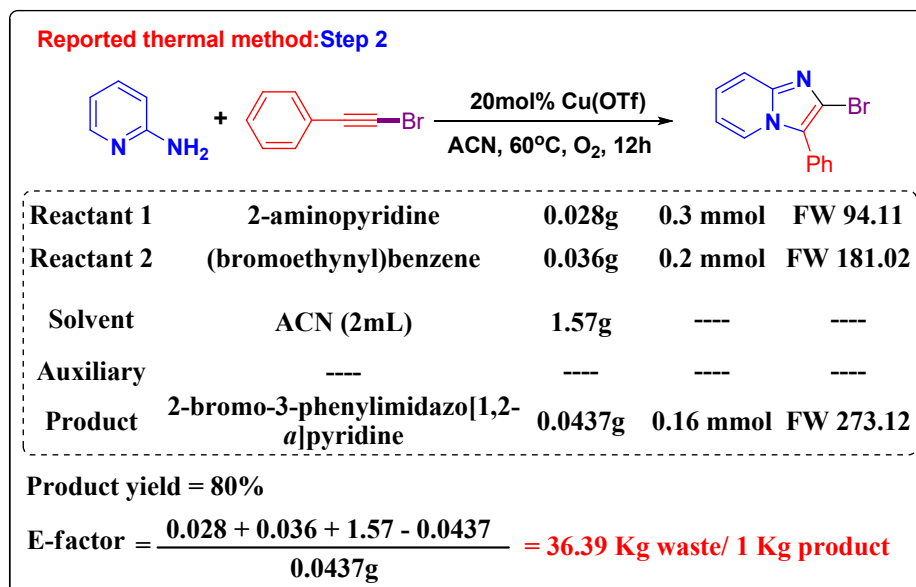

### C. Evaluation of E-factor of the reported thermal reaction (Step 3)

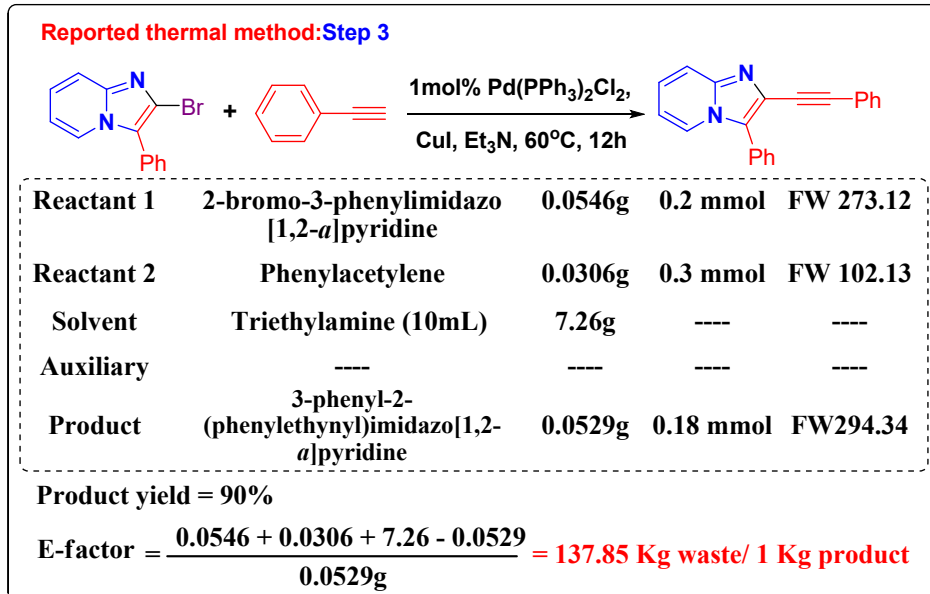

E-factor is defined as (the weight, kg, of wastes produced)/(per kg product formed). From the green organic synthetic chemistry point of view, the E-factor is the crucial parameter of the green chemistry metrics as it shows the amount of waste generated in a reaction. To get a better understanding of the importance of the current green photochemical process, we have evaluated and compared the E-factor of the reported three-step thermal method with our current single-step photochemical method for the synthesis of substituted imidazo[1,2- $\alpha$ ]pyridine (Product 3). The detailed comparison of the reported thermal method and our current photochemical method based on the number of steps, overall yield, and E-factor is presented in the **Scheme S7**.



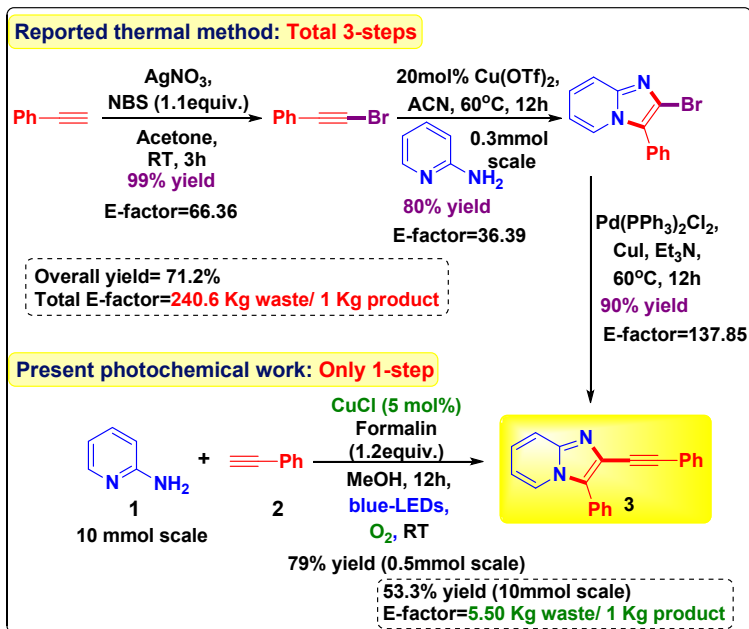

**Scheme S7:** Synthesis of 2, 3-disubstituted imidazo[1,2- $\alpha$ ]pyridines by the thermal and the current photochemical process.

The results showed that the thermal process formed product **3** in three steps with an overall yield of 71.2% (0.2mmol scale) and an E-factor of 240.6. On the contrary, the current green protocol formed product **3** in only a single step with a yield of 79% on 0.5 mmol scale and 53.3% on 10.0mmol scale with an E-factor of only 5.5. The current photochemical method forms imidazo[1,2- $\alpha$ ]pyridine product in a single step with an excellent E-factor (43.7 times better than that of the reported thermal method) (See ESI for details) and in a good yield of 79%. In addition, the thermal process uses toxic brominating reagents (NBS), toxic solvents (ACN, Et<sub>3</sub>N), and expensive metal catalysts (Ag and Pd), which adversely affect human health and the environment. On the other hand, the present photochemical method solely uses inexpensive CuCl as a catalyst, molecular O<sub>2</sub> as an oxidant, formalin as an additive (which on oxidation undergoes decarboxylation), commercially available starting materials, and low-energy visible light to form substituted imidazo[1,2- $\alpha$ ]pyridine products. **Thus, in terms of the chemicals used, the easiness of operation, and friendliness to the ecosystem, our photoredox method is better than the reported thermal method.**

## 6. Photochemical reaction setup

**Light source:** Kessil lights A360N/A360W (Power density: 150 mW/cm<sup>2</sup> at 460 nm)

Please visit this link for more details: [www.kessil.com](http://www.kessil.com)

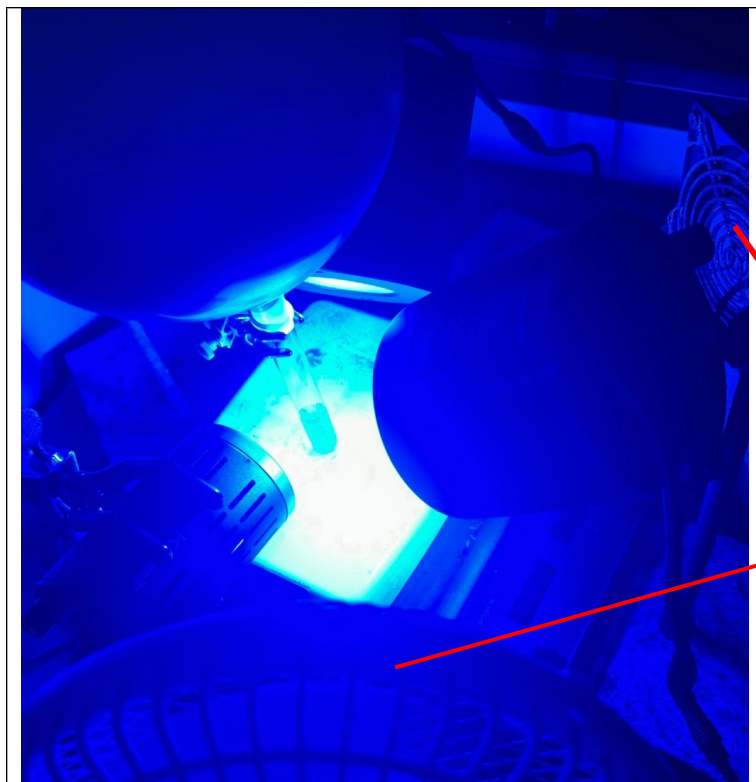

All light reactions were conducted in air-conditioned room with a cooling fan around blue-LED's to maintain the reaction temperature within 25-28 °C.

**Cooling fans**

## 7. Spectroscopic Data

### 3-phenyl-2-(phenylethynyl)imidazo[1,2-a]pyridine (3)

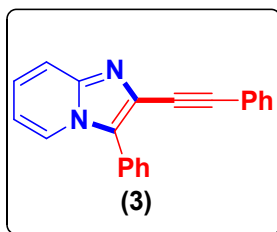

The product obtained as a pale yellow oil in 79.3% (116.7 mg) yield.

**<sup>1</sup>H NMR** (400 MHz, CDCl<sub>3</sub>): δ 8.21 (d, *J* = 7.2 Hz, 1H), 7.68-7.67 (m, 2H), 7.57-7.49 (m, 3H), 7.46-7.38 (m, 3H), 7.28-7.24 (m, 3H), 7.18-7.14 (m, 1H), 6.76-6.72 (m, 1H);

**<sup>13</sup>C NMR** (175 MHz, CDCl<sub>3</sub>): δ 144.8, 131.5, 128.9, 128.6, 128.5, 128.2, 128.1, 127.7, 126.6, 125.3, 123.1, 122.8, 117.7, 112.9, 91.7 and 83.5;

**ESI-MS** calcd for C<sub>21</sub>H<sub>14</sub>N<sub>2</sub> (M+H)<sup>+</sup>: 294.1157, found: 295.1239.

**IR** (KBr): ν = 3057, 2929, 2852, 2216, 1954, 1887, 1735, 1674, 1633, 1598, 1574, 1525, 1493, 1444, 1396, 1352, 1311, 1273, 1251, 1223, 1189, 1157, 1072, 1017, 988, 914, 878, 829, 776, 737, 694, 574, 499 cm<sup>-1</sup>.

### 3-phenylimidazo[1,2-a]pyridine (3')

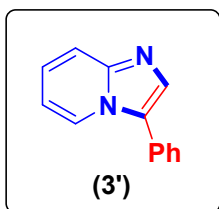

The product obtained as a pale yellow oil.

**<sup>1</sup>H NMR** (400 MHz, CDCl<sub>3</sub>): δ 8.33-8.31 (m, 1H), 7.67 (d, *J* = 11.6 Hz, 2H), 7.55-7.47 (m, 4H), 7.42-7.37 (m, 1H), 7.20-7.15 (m, 1H), 6.80-6.77 (m, 1H);

**<sup>13</sup>C NMR** (175 MHz, CDCl<sub>3</sub>): δ 132.5, 129.3, 129.2, 128.2, 128.0, 124.2, 123.3, 118.2 and 112.5;

**ESI-MS** calcd for C<sub>13</sub>H<sub>10</sub>N<sub>2</sub> (M+H)<sup>+</sup>: 194.0844, found: 195.0923.

**IR** (KBr):  $\nu = 3367, 3054, 3031, 2922, 2851, 1731, 1679, 1634, 1602, 1574, 1522, 1499, 1480, 1446, 1352, 1297, 1263, 1175, 1149, 1073, 1009, 963, 914, 894, 858, 829, 780, 752, 736, 698, 660, 579, 529 \text{ cm}^{-1}$ .

### 3-(naphthalen-2-yl)-2-(naphthalen-2-ylethynyl)imidazo[1,2-a]pyridine (4)

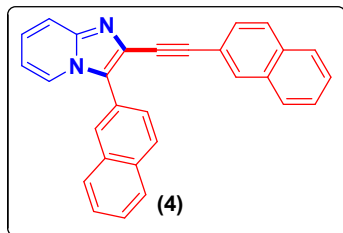

The product obtained as a pale yellow oil in 73.2% (144.3 mg) yield.

**$^1\text{H NMR}$**  (400 MHz,  $\text{CDCl}_3$ ):  $\delta$  8.09 (d,  $J = 8.4 \text{ Hz}$ , 1H), 8.03 (d,  $J = 8.4 \text{ Hz}$ , 1H), 7.95 (d,  $J = 8.4 \text{ Hz}$ , 1H), 7.82 (d,  $J = 6 \text{ Hz}$ , 1H), 7.72-7.65 (m, 6H), 7.61-7.50 (m, 3H), 7.48-7.41 (m, 1H), 7.39-7.33 (m, 1H), 7.31-7.24 (m, 1H), 7.19-7.16 (m, 1H), 6.76-6.70 (m, 1H);

**$^{13}\text{C NMR}$**  (175 MHz,  $\text{CDCl}_3$ ):  $\delta$  134.1, 133.9, 133.0, 132.9, 132.1, 131.8, 130.3, 130.1, 129.8, 129.6, 129.2, 128.7, 128.0, 127.1, 127.0, 126.5, 126.4, 126.3, 126.2, 126.1, 125.7, 125.6, 125.5, 125.4, 125.2, 125.1, 124.1, 120.4, 117.8, 112.9, 112.3, 90.9 and 88.1.

**ESI-MS** calcd for  $\text{C}_{29}\text{H}_{18}\text{N}_2$  ( $\text{M}+\text{H}$ ): 394.1470, found: 395.1552.

**IR** (KBr):  $\nu = 3047, 2955, 2923, 2851, 2210, 1926, 1733, 1633, 1585, 1500, 1462, 1416, 1376, 1350, 1293, 1276, 1245, 1214, 1177, 1143, 1054, 1016, 958, 863, 800, 774, 753, 737, 667, 618, 566, 479 \text{ cm}^{-1}$ .

### 3-(p-tolyl)-2-(p-tolyethynyl)imidazo[1,2-a]pyridine (5)

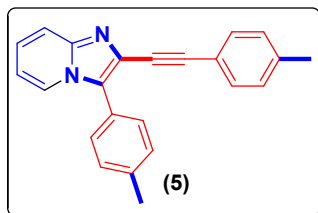

The product obtained as a Colourless solid in 76.0% (122.5 mg) yield.

**$^1\text{H NMR}$**  (400 MHz,  $\text{CDCl}_3$ ):  $\delta$  8.24 (d,  $J = 7.2 \text{ Hz}$ , 1H), 7.62-7.57 (m, 3H), 7.38-7.33 (m, 4H), 7.24-7.17 (m, 1H), 7.11 (d,  $J = 8 \text{ Hz}$ , 2H), 6.79-6.75 (m, 1H), 2.43 (s, 3H), 2.32 (s, 3H);

**$^{13}\text{C NMR}$**  (175 MHz,  $\text{CDCl}_3$ ):  $\delta$  144.7, 138.6, 138.5, 131.5, 129.7, 129.0, 128.6, 127.6, 126.5, 125.3, 125.2, 123.3, 120.0, 117.8, 112.9, 92.1, 82.9, 21.5 and 21.4;

**ESI-MS** calcd for  $\text{C}_{23}\text{H}_{18}\text{N}_2$  ( $\text{M}+\text{Na}$ ): 322.1470, found: 345.1368.

**IR** (KBr):  $\nu = 3026, 2954, 2922, 2852, 2213, 1903, 1786, 1728, 1631, 1604, 1570, 1543, 1515, 1464, 1446, 1396, 1378, 1347, 1309, 1272, 1250, 1210, 1187, 1177, 1139, 1029, 1015, 991, 946, 877, 815, 751, 737, 668, 623, 569, 527, 504, 474 \text{ cm}^{-1}$ .

**3-(3,5-dimethylphenyl)-2-((3,5-dimethylphenyl)ethynyl)imidazo[1,2-a]pyridine (6)**

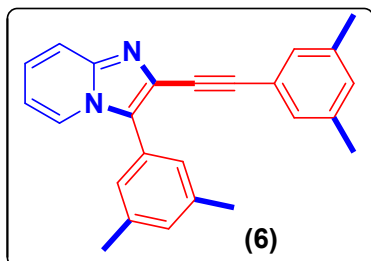

The product obtained as a Pale yellow oil in 64.3% (112.6 mg) yield.

**<sup>1</sup>H NMR** (400 MHz, CDCl<sub>3</sub>):  $\delta$  8.29 (d,  $J = 6.8$  Hz, 1H), 7.59 (d,  $J = 9.2$  Hz, 1H), 7.36 (s, 2H), 7.24-7.17 (m, 1H), 7.10-7.09 (m, 3H), 6.92 (s, 1H), 6.80-6.77 (m, 1H), 2.41 (s, 6H), 2.26 (s, 6H);

**<sup>13</sup>C NMR** (175 MHz, CDCl<sub>3</sub>):  $\delta$  144.8, 138.6, 137.7, 130.3, 130.2, 129.2, 128.1, 127.9, 126.7, 126.3, 125.3, 123.4, 122.7, 117.8, 112.8, 92.3, 83.1, 21.4 and 21.1;

**ESI-MS** calcd for C<sub>25</sub>H<sub>22</sub>N<sub>2</sub> (M+Na): 350.1783, found: 373.1682.

**IR** (KBr):  $\nu = 2954, 2915, 2850, 2219, 1735, 1635, 1600, 1501, 1468, 1400, 1377, 1346, 1277, 1236, 1186, 1165, 1143, 1039, 941, 898, 850, 753, 716, 688, 575, 538 \text{ cm}^{-1}$ .

**3-(4-butylphenyl)-2-((4-butylphenyl)ethynyl)imidazo[1,2-a]pyridine (7)**

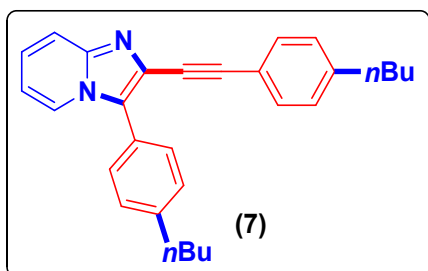

The product obtained as a Yellow oil in 70.1% (142.5 mg) yield.

**<sup>1</sup>H NMR** (400 MHz, CDCl<sub>3</sub>):  $\delta$  8.25 (d,  $J = 6.8$  Hz, 1H), 7.64-7.59 (m, 3H), 7.36-7.21 (m, 4H), 7.20-7.17 (m, 1H), 7.10 (d,  $J = 8$  Hz, 2H), 6.79-6.75 (m, 1H), 2.68 (t,  $J = 7.6$  Hz, 2H), 2.57 (t,  $J = 7.6$  Hz, 2H), 1.67-1.61 (m, 2H), 1.57-1.51 (m, 2H), 1.43-1.37 (m, 2H), 1.34-1.23 (m, 2H), 0.95 (t,  $J = 7.2$  Hz, 3H), 0.89 (t,  $J = 7.2$  Hz, 3H);

$^{13}\text{C}$  NMR (175 MHz,  $\text{CDCl}_3$ ):  $\delta$  144.8, 143.6, 143.4, 131.5, 129.0, 128.6, 128.3, 127.7, 126.6, 125.4, 125.2, 123.3, 120.1, 117.9, 112.9, 92.1, 83.0, 46.1, 35.6, 35.5, 33.5, 33.3, 22.4, 22.3 and 13.9;

EI-HRMS calcd for  $\text{C}_{29}\text{H}_{30}\text{N}_2$  ( $\text{M}+\text{Na}$ ): 406.2409, found: 429.2308.

IR (KBr):  $\nu$  = 3359, 3191, 2955, 2922, 2851, 2216, 1908, 1735, 1657, 1647, 1633, 1542, 1515, 1502, 1399, 1377, 1350, 1272, 1250, 1221, 1179, 1118, 1015, 881, 833, 752, 736, 644, 611, 533  $\text{cm}^{-1}$ .

### 3-(4-(tert-butyl)phenyl)-2-((4-(tert-butyl)phenyl)ethynyl)imidazo[1,2-a]pyridine (8)

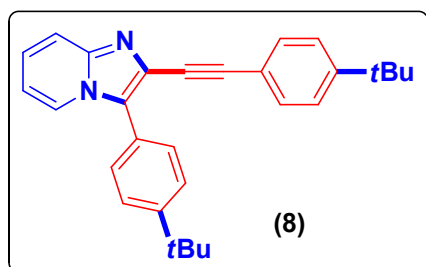

The product obtained as a Pale yellow oil in 73.9% (150.2 mg) yield.

$^1\text{H}$  NMR (400 MHz,  $\text{CDCl}_3$ ):  $\delta$  8.30 (d,  $J$  = 7.2 Hz, 1H), 7.67-7.57 (m, 3H), 7.56 (d,  $J$  = 7.6 Hz, 2H), 7.44-7.42 (m, 2H), 7.34-7.32 (m, 2H), 7.24-7.20 (m, 1H), 6.79 (t,  $J$  = 6.8 Hz, 1H), 1.38 (s, 9H), 1.29 (s, 9H);

$^{13}\text{C}$  NMR (175 MHz,  $\text{CDCl}_3$ ):  $\delta$  151.8, 151.7, 131.4, 128.4, 127.6, 126.0, 125.5, 125.3, 125.2, 123.5, 120.0, 117.7, 113.0, 106.5, 92.3, 34.9, 34.8, 31.3 and 31.1;

EI-HRMS calcd for  $\text{C}_{29}\text{H}_{30}\text{N}_2$  ( $\text{M}+\text{Na}$ ): 406.2409, found: 429.2303.

IR (KBr):  $\nu$  = 3081, 3036, 2958, 2925, 2855, 2215, 1912, 1664, 1633, 1604, 1539, 1516, 1501, 1463, 1396, 1361, 1347, 1270, 1252, 1226, 1200, 1141, 1108, 1014, 1108, 1014, 963, 880, 833, 751, 735, 618, 559  $\text{cm}^{-1}$ .

### 3-(3-methoxyphenyl)-2-((3-methoxyphenyl)ethynyl)imidazo[1,2-a]pyridine (9)

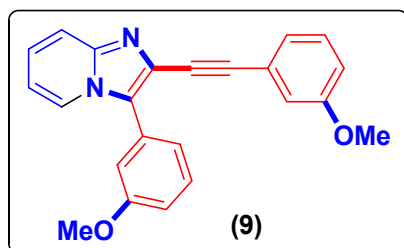

The product obtained as a Colourless oil in 71.4% (126.5 mg) yield.

**<sup>1</sup>H NMR** (700 MHz, CDCl<sub>3</sub>): δ 8.32 (d, *J*= 9.1 Hz, 1H), 7.64 (d, *J*= 9.1 Hz, 1H), 7.48 (t, *J*= 8.4 Hz, 1H), 7.32-7.30 (m, 2H), 7.26-7.21 (m, 2H), 7.10 (d, *J*= 7.7 Hz, 1H), 7.05 (s, 1H), 7.01-7.0 (m, 1H), 6.88 (dd, *J*= 8.4 Hz, 1H), 6.83 (t, *J*= 7 Hz, 1H), 3.87 (s, 3H), 3.79 (s, 3H);

**<sup>13</sup>C NMR** (175 MHz, CDCl<sub>3</sub>): δ 160.1, 159.2, 144.9, 130.1, 129.3, 127.7, 126.4, 125.7, 124.1, 123.9, 123.5, 120.9, 117.9, 116.3, 115.2, 114.5, 114.3, 113.2, 92.2, 83.1, 55.4 and 55.2;

**ESI-MS** calcd for C<sub>23</sub>H<sub>18</sub>N<sub>2</sub>O<sub>2</sub> (M+H)<sup>+</sup>: 354.1368, found: 355.1440.

**IR** (KBr): ν = 3067, 2955, 2922, 2851, 2213, 1732, 1686, 1633, 1597, 1574, 1487, 1462, 1426, 1387, 1345, 1315, 1283, 1252, 1200, 1153, 1138, 1082, 1042, 1024, 993, 962, 854, 780, 751, 736, 698, 685, 561, 533, 516, 486 cm<sup>-1</sup>.

### 3-(4-bromophenyl)-2-((4-bromophenyl)ethynyl)imidazo[1,2-a]pyridine (10)

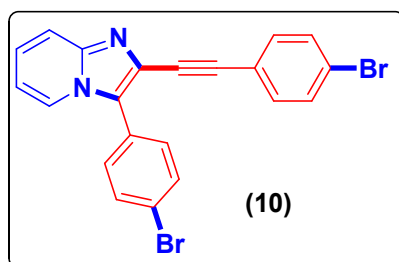

The product obtained as a Colourless Solid in 74.1% (167.5 mg) yield.

**<sup>1</sup>H NMR** (400 MHz, CDCl<sub>3</sub>): δ 8.17-8.16 (m, 1H), 7.97-7.65 (m, 2H), 7.65-7.54 (m, 3H), 7.42 (d, *J*= 8.8 Hz, 2H), 7.30 (d, *J*= 8.4 Hz, 2H), 7.22-7.20 (m, 1H), 6.80 (t, *J*= 6.8 Hz, 1H);

**<sup>13</sup>C NMR** (175 MHz, CDCl<sub>3</sub>): δ 145.1, 133.0, 132.4, 131.6, 130.2, 127.0, 126.7, 126.6, 125.8, 123.0, 122.8, 121.6, 118.0, 113.4, 91.1 and 84.2;

**ESI-MS** calcd for C<sub>21</sub>H<sub>12</sub>Br<sub>2</sub>N<sub>2</sub> (M+H)<sup>+</sup>: 449.9367, found: 450.9444.

**IR** (KBr): ν = 3326, 2955, 2918, 2851, 1735, 1649, 1586, 1489, 1466, 1395, 1377, 1309, 1274, 1249, 1218, 1191, 1157, 1123, 1089, 1071, 1024, 952, 889, 855, 823, 758, 721, 498 cm<sup>-1</sup>.

### 3-(2-chlorophenyl)-2-((2-chlorophenyl)ethynyl)imidazo[1,2-a]pyridine (11)

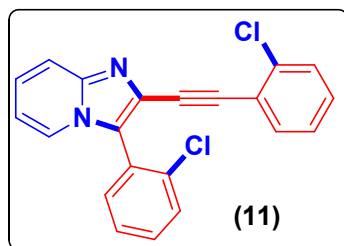

The product obtained as a Yellow oil in 67.9% (123.3 mg) yield.

**<sup>1</sup>H NMR** (700 MHz, CDCl<sub>3</sub>): δ 7.70 (d, *J* = 7 Hz, 1H), 7.66-7.62 (m, 2H), 7.55 (d, *J* = 7.7 Hz, 1H), 7.47-7.44 (m, 1H), 7.43-7.40 (m, 2H), 7.30 (d, *J* = 7.7 Hz, 1H), 7.26-7.18 (m, 1H), 7.18-7.13 (m, 2H), 6.81-6.79 (m, 1H);

**<sup>13</sup>C NMR** (175 MHz, CDCl<sub>3</sub>): δ 145.0, 135.9, 134.6, 133.9, 133.3, 130.8, 130.1, 129.3, 129.1, 127.4, 127.2, 127.0, 126.3, 126.2, 125.7, 124.6, 122.8, 117.7, 112.8, 89.0 and 88.0;

**ESI-MS** calcd for C<sub>21</sub>H<sub>12</sub>Cl<sub>2</sub>N<sub>2</sub> (M+Na): 362.0378, found: 385.0278.

**IR** (KBr): ν = 3060, 2954, 2925, 2852, 2219, 1922, 1801, 1733, 1679, 1634, 1591, 1564, 1502, 1480, 1434, 1392, 1351, 1280, 1246, 1221, 1194, 1128, 1070, 1057, 1018, 991, 948, 881, 829, 788, 753, 689, 668, 616, 549, 488, 453 cm<sup>-1</sup>.

### 3-(2-fluorophenyl)-2-((2-fluorophenyl)ethynyl)imidazo[1,2-a]pyridine (12)

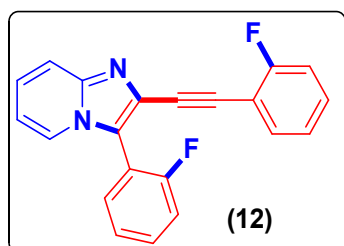

The product obtained as a Pale yellow oil in 66.4% (109.7 mg) yield.

**<sup>1</sup>H NMR** (400 MHz, CDCl<sub>3</sub>): δ 7.84-7.81 (m, 1H), 7.77-7.71 (m, 1H), 7.65 (d, *J* = 8.8 Hz, 1H), 7.48-7.42 (m, 1H), 7.30-7.25 (m, 2H), 7.11-7.0 (m, 3H), 6.88-6.78 (m, 3H);

**<sup>13</sup>C NMR** (175 MHz, CDCl<sub>3</sub>): δ 163.6, 163.0, 162.5, 162.4, 162.2, 162.1, 160.9, 160.8, 159.4, 159.3, 145.3, 134.3, 134.2, 133.6, 133.5, 127.4, 126.0, 124.4, 122.3, 117.8, 113.3, 112.4, 112.3, 111.7, 111.6, 107.7, 107.6, 105.0, 104.8, 104.7, 104.4, 104.3, 104.1, 87.4 and 84.9;



**<sup>13</sup>C NMR** (175 MHz, CDCl<sub>3</sub>): δ 163.9 (*J*<sub>C-F</sub> = 49.1 Hz), 163.8 (*J*<sub>C-F</sub> = 48.3 Hz), 163.0 (*J*<sub>C-F</sub> = 97.8 Hz), 162.9 (*J*<sub>C-F</sub> = 98.1 Hz), 162.2 (*J*<sub>C-F</sub> = 11.2 Hz), 160.8 (*J*<sub>C-F</sub> = 251.1 Hz), 160.7 (*J*<sub>C-F</sub> = 250.9 Hz), 145.3, 134.2 (*J*<sub>C-F</sub> = 9.8 Hz, 9.6 Hz), 133.5 (*J*<sub>C-F</sub> = 9.8 Hz, 9.6 Hz), 127.3, 125.9, 124.4 (*J*<sub>C-F</sub> = 5.2 Hz), 122.3, 117.8, 113.2, 112.4 (*J*<sub>C-F</sub> = 21.1 Hz), 111.7 (*J*<sub>C-F</sub> = 21.8 Hz), 111.6 (*J*<sub>C-F</sub> = 21.7 Hz), 107.7 (*J*<sub>C-F</sub> = 15.9 Hz), 104.9 (*J*<sub>C-F</sub> = 50.5 Hz), 104.4 (*J*<sub>C-F</sub> = 25.7 Hz), 104.2 (*J*<sub>C-F</sub> = 25.9 Hz), 87.4 and 84.8;

**<sup>19</sup>F NMR** (470 MHz, CCl<sub>3</sub>F): δ -61.2 (s), -62.9 (s).

**ESI-MS** calcd for C<sub>21</sub>H<sub>12</sub>F<sub>2</sub>N<sub>2</sub> (M-H): 330.0969, found: 329.0004.

**IR** (KBr): ν = 3077, 2953, 2920, 2850, 2222, 1733, 1615, 1588, 1543, 1511, 1502, 1476, 1455, 1423, 1398, 1377, 1354, 1293, 1265, 1247, 1182, 1142, 1097, 1021, 995, 963, 842, 812, 748, 731, 671, 606, 565, 509, 489 cm<sup>-1</sup>.

### 3-(4-fluorophenyl)-2-((4-fluorophenyl)ethynyl)imidazo[1,2-a]pyridine (13)

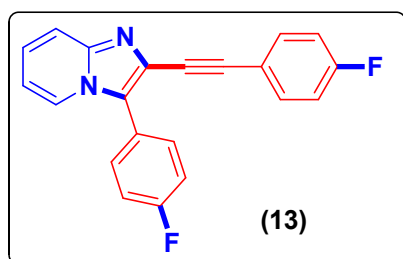

The product obtained as a Pale yellow solid in 72.3% (119.4 mg) yield.

**<sup>1</sup>H NMR** (400 MHz, CDCl<sub>3</sub>): δ 8.17 (d, *J* = 6.8 Hz, 1H), 7.69-7.66 (m, 2H), 7.60 (d, *J* = 9.2 Hz, 1H), 7.45-7.41 (m, 2H), 7.28-7.20 (m, 3H), 6.99 (t, *J* = 8.8 Hz, 2H), 6.81 (t, *J* = 6.8 Hz, 1H);

**<sup>13</sup>C NMR** (175 MHz, CDCl<sub>3</sub>): δ 163.4, 163.3, 162.0, 161.9, 145.0, 133.5, 130.8, 126.8, 126.7, 125.5, 124.2, 123.0, 118.9, 118.0, 116.4, 116.2, 115.7, 115.6, 113.2, 90.8 and 83.0;

**<sup>13</sup>C NMR** (175 MHz, CDCl<sub>3</sub>): δ 163.4 (*J*<sub>C-F</sub> = 248.1 Hz), 162.0 (*J*<sub>C-F</sub> = 248.8 Hz), 144.9, 133.5 (*J*<sub>C-F</sub> = 8.4 Hz), 130.8 (*J*<sub>C-F</sub> = 8.2 Hz), 126.7 (*J*<sub>C-F</sub> = 12.4 Hz), 125.5, 124.2, 123.0, 118.9 (*J*<sub>C-F</sub> = 3.5 Hz), 118.0, 116.3 (*J*<sub>C-F</sub> = 21.5 Hz), 115.7 (*J*<sub>C-F</sub> = 22.0 Hz), 113.2, 90.8 and 82.9;

**<sup>19</sup>F NMR** (470 MHz, CCl<sub>3</sub>F): δ -110.2 (s), -111.3 (s).

**ESI-MS** calcd for C<sub>21</sub>H<sub>12</sub>F<sub>2</sub>N<sub>2</sub> (M+Na): 330.0969, found: 353.0850.

**IR** (KBr): ν = 3359, 3190, 2955, 2920, 2850, 2217, 1728, 1647, 1633, 1601, 1543, 1515, 1502, 1468, 1413, 1377, 1346, 1275, 1228, 1157, 1094, 1014, 880, 831, 815, 750, 737, 721, 640, 606, 569, 525 cm<sup>-1</sup>.

### 3-(2,4-difluorophenyl)-2-((2,4-difluorophenyl)ethynyl)imidazo[1,2-a]pyridine (14)

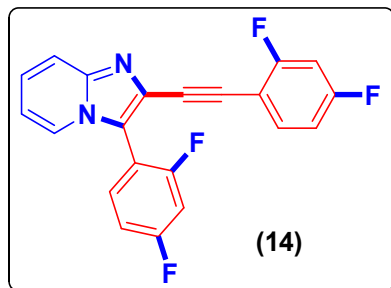

The product obtained as a solid in 63.1% (115.6 mg) yield.

**<sup>1</sup>H NMR** (400 MHz, CDCl<sub>3</sub>): δ 7.82-7.79 (m, 1H), 7.75 (q, *J* = 8.4 Hz, 1H), 7.64 (d, *J* = 9.2 Hz, 1H), 7.44-7.39 (m, 1H), 7.28-7.24 (m, 1H), 7.09-6.79 (m, 2H), 6.86-6.76 (m, 3H);

**<sup>13</sup>C NMR** (175 MHz, CDCl<sub>3</sub>): δ 162.4, 162.3, 162.2, 162.1, 160.8, 160.7, 159.3, 145.1, 134.2, 134.1, 133.5, 133.4, 127.0, 126.1, 124.4, 124.3, 122.3, 117.6, 113.3, 112.4, 112.3, 112.2, 111.9, 111.8, 111.7, 111.6, 111.5, 107.6, 107.5, 105.0, 104.8, 104.6, 104.3, 104.2, 104.0, 87.1 and 85.1;

**<sup>13</sup>C NMR** (175 MHz, CDCl<sub>3</sub>): δ 163.7 (*J*<sub>C-F</sub> = 43.2 Hz), 162.6 (*J*<sub>C-F</sub> = 104.4 Hz), 162.9 (*J*<sub>C-F</sub> = 103.6 Hz), 162.4 (*J*<sub>C-F</sub> = 42.0 Hz), 160.8 (*J*<sub>C-F</sub> = 251.1 Hz), 159.3 (*J*<sub>C-F</sub> = 251.1 Hz), 145.0, 134.2 (*J*<sub>C-F</sub> = 9.8 Hz), 134.2 (*J*<sub>C-F</sub> = 9.8 Hz), 133.5 (*J*<sub>C-F</sub> = 9.6 Hz), 133.4 (*J*<sub>C-F</sub> = 9.8 Hz), 126.9, 126.1, 124.3 (*J*<sub>C-F</sub> = 5.0 Hz), 122.2, 117.5, 113.3, 112.4 (*J*<sub>C-F</sub> = 21.3 Hz), 112.3 (*J*<sub>C-F</sub> = 21.3 Hz), 111.8 (*J*<sub>C-F</sub> = 15.0 Hz), 111.7 (*J*<sub>C-F</sub> = 15.0 Hz), 111.6 (*J*<sub>C-F</sub> = 21.8 Hz, 21.7 Hz), 107.6 (*J*<sub>C-F</sub> = 15.7 Hz), 107.5 (*J*<sub>C-F</sub> = 15.7 Hz), 104.9 (*J*<sub>C-F</sub> = 50.5 Hz), 104.7 (*J*<sub>C-F</sub> = 74.3 Hz), 104.1 (*J*<sub>C-F</sub> = 25.7 Hz), 87.1 and 85.0;

**<sup>19</sup>F NMR** (470 MHz, CCl<sub>3</sub>F): δ -104.7 (d), -105.3 (d), -106.0 (s), -106.8 (s).

**EI-HRMS** calcd for C<sub>21</sub>H<sub>10</sub>F<sub>4</sub>N<sub>2</sub> (M+H): 366.0780, found: 367.0857.

**IR** (KBr): ν = 3078, 2953, 2918, 2850, 2220, 1733, 1615, 1588, 1542, 1501, 1455, 1424, 1399, 1354, 1293, 1264, 1142, 1097, 1020, 995, 963, 937, 842, 811, 748, 731, 672, 633, 565, 509, 488, 429 cm<sup>-1</sup>.

### 3-(2-(trifluoromethyl)phenyl)-2-((2-(trifluoromethyl)phenyl)ethynyl)imidazo[1,2-a]pyridine (15)

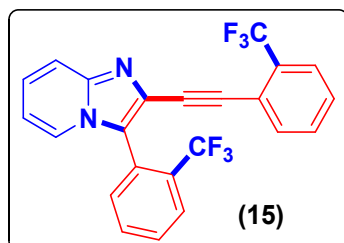

The product obtained as a Pale yellow oil in 61.4% (132.1 mg) yield.

**<sup>1</sup>H NMR** (700 MHz, CDCl<sub>3</sub>): δ 7.88 (d, *J* = 7.7 Hz, 1H), 7.71-7.65 (m, 2H), 7.61-7.58 (m, 2H), 7.51 (dd, *J* = 7.7 Hz, 3H), 7.41 (t, *J* = 7.7 Hz, 1H), 7.30 (t, *J* = 7.0 Hz, 1H), 7.22 (t, *J* = 7.7 Hz, 1H), 6.74 (t, *J* = 7.0 Hz, 1H);

**<sup>13</sup>C NMR** (175 MHz, CDCl<sub>3</sub>): δ 144.8, 134.2, 133.9, 132.3, 131.9, 131.7, 131.3, 131.2, 131.1, 130.3, 127.9, 127.8, 126.8, 126.7, 126.0, 125.6, 125.5, 125.1, 124.2, 124.0, 123.8, 122.7, 122.2, 121.0, 117.6, 113.0, 88.1 and 88.0;

**<sup>13</sup>C NMR** (175 MHz, CDCl<sub>3</sub>): δ 144.8, 134.2, 133.9, 132.3, 132.0 (q, *J*<sub>C-F</sub> = 30.2 Hz, 30.3 Hz), 131.4 (q, *J*<sub>C-F</sub> = 30.5 Hz, 30.4 Hz), 131.2, 130.2, 129.1 (*J*<sub>C-F</sub> = 227.3 Hz), 127.9, 127.8 (*J*<sub>C-F</sub> = 319.3 Hz), 126.0 (q, *J*<sub>C-F</sub> = 5.0 Hz, 4.9 Hz), 125.6 (q, *J*<sub>C-F</sub> = 5.0 Hz, 5.2 Hz), 125.1, 124.2, 123.9, 123.8, 122.6, 122.2, 120.9, 117.5, 112.9, 88.1 and 88.0;

**<sup>19</sup>F NMR** (470 MHz, CCl<sub>3</sub>F): δ -104.7 (d), -105.3 (d), -106.1 (d), -107.0 (d).

**EI-HRFD** calcd for C<sub>23</sub>H<sub>12</sub>F<sub>6</sub>N<sub>2</sub> (M+Na): 430.0905, found: 453.0798.

**IR** (KBr): ν = 3360, 3188, 3074, 2955, 2921, 2851, 2222, 1943, 1838, 1734, 1699, 1658, 1603, 1574, 1493, 1469, 1449, 1393, 1351, 1316, 1263, 1219, 1169, 1128, 1110, 1057, 1033, 1018, 991, 959, 877, 830, 800, 766, 751, 719, 653, 612, 595, 537 cm<sup>-1</sup>.

#### Methyl 4-(2-((4-(methoxycarbonyl)phenyl)ethynyl)imidazo[1,2-a]pyridin-3-yl)benzoate (16)

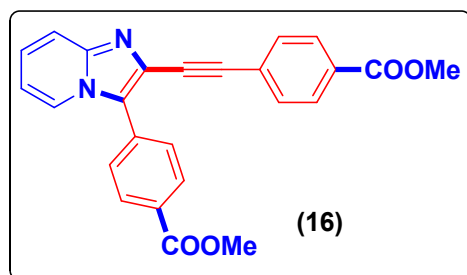

The product obtained as a Pale yellow powder in 60.3% (123.7 mg) yield.

**<sup>1</sup>H NMR** (700 MHz, CDCl<sub>3</sub>): δ 8.28 (d, *J* = 7.0 Hz, 1H), 8.22 (d, *J* = 8.4 Hz, 2H), 7.97 (d, *J* = 8.4 Hz, 2H), 7.82 (d, *J* = 8.4 Hz, 2H), 7.65 (d, *J* = 9.1 Hz, 1H), 7.51 (d, *J* = 7.7 Hz, 2H), 7.28 (t, *J* = 7.7 Hz, 1H), 6.88-6.86 (m, 1H), 3.95 (s, 3H), 3.88 (s, 3H);

**<sup>13</sup>C NMR** (175 MHz, CDCl<sub>3</sub>): δ 166.4, 145.3, 132.4, 131.5, 130.3, 130.1, 129.8, 128.3, 127.2, 126.7, 126.4, 123.3, 118.1, 113.8, 91.8, 85.8, 52.3 and 52.2;

**EI-HRFD** calcd for C<sub>25</sub>H<sub>18</sub>N<sub>2</sub>O<sub>4</sub> (M+Na): 410.1267, found: 433.1164.

**IR** (KBr): ν = 3307, 2955, 2921, 2851, 2216, 1722, 1606, 1497, 1464, 1403, 1377, 1311, 1280, 1190, 1107, 1018, 968, 854, 826, 764, 751, 731, 695 cm<sup>-1</sup>.

### 1-(4-(2-((4-acetylphenyl)ethynyl)imidazo[1,2-a]pyridin-3-yl)phenyl)ethan-1-one (17)

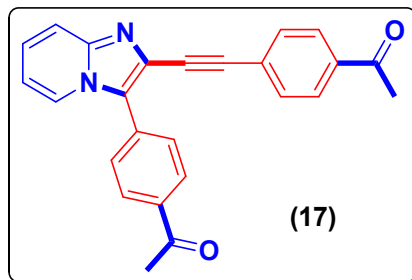

The product obtained as a white powder in 54.8% (103.7 mg) yield.

**<sup>1</sup>H NMR** (700 MHz, CDCl<sub>3</sub>): δ 8.26 (d, *J*= 11.9 Hz, 1H), 8.12 (d, *J*= 3.5 Hz, 2H), 7.87-7.81 (m, 4H), 7.61-7.57 (m, 1H), 7.52-7.49 (m, 2H), 7.26-7.22 (m, 1H), 6.86-6.82 (m, 1H);

**<sup>13</sup>C NMR** (175 MHz, CDCl<sub>3</sub>): δ 197.1, 145.5, 136.7, 136.3, 132.6, 131.6, 129.2, 129.0, 128.4, 128.2, 127.3, 127.2, 127.1, 127.0, 126.2, 123.2, 118.1, 113.7, 91.5 and 86.4;

**EI-HRFD** calcd for C<sub>25</sub>H<sub>18</sub>N<sub>2</sub>O<sub>2</sub> (M+Na): 378.1368, found: 401.1271.

**IR** (KBr): ν = 3340, 2955, 2918, 2851, 2214, 1735, 1682, 1602, 1559, 1497, 1463, 1403, 1377, 1360, 1309, 1267, 1187, 1156, 1124, 1089, 1024, 955, 889, 829, 755, 593 cm<sup>-1</sup>.

### 3-(thiophen-2-yl)-2-(thiophen-2-ylethynyl)imidazo[1,2-a]pyridine (19)

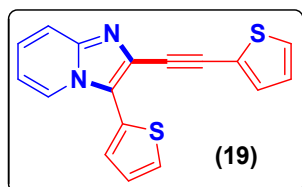

The product obtained as a Pale yellow oil in 64.1% (98.2 mg) yield.

**<sup>1</sup>H NMR** (400 MHz, CDCl<sub>3</sub>): δ 8.43-8.41 (m, 1H), 7.62-7.59 (m, 1H), 7.51-7.49 (m, 2H), 7.31-7.27 (m, 2H), 7.25-7.21 (m, 2H), 7.0-6.98 (m, 1H), 6.89-6.86 (m, 1H);

**<sup>13</sup>C NMR** (175 MHz, CDCl<sub>3</sub>): δ 145.1, 132.5, 128.7, 127.8, 127.6, 127.1, 126.6, 125.8, 123.8, 122.9, 122.0, 118.8, 117.9, 113.5, 86.9 and 86.8;

**ESI-MS** calcd for C<sub>17</sub>H<sub>10</sub>N<sub>2</sub>S<sub>2</sub> (M+H)<sup>+</sup>: 306.0285, found: 307.0373.

**IR** (KBr): ν = 3339, 2956, 2920, 2851, 2210, 1737, 1635, 1565, 1464, 1413, 1378, 1247, 1234, 1162, 1088, 1020, 951, 890, 850, 825, 752, 720, 699 cm<sup>-1</sup>.

### 6-methyl-3-phenyl-2-(phenylethynyl)imidazo[1,2-a]pyridine (20)

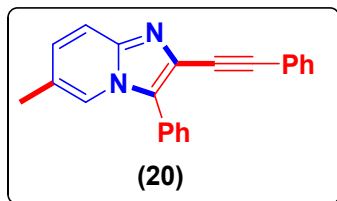

The product obtained as a Pale yellow powder in 43.4% (66.9 mg) yield.

**<sup>1</sup>H NMR** (700 MHz, CDCl<sub>3</sub>): δ 8.02 (s, 1H), 7.27 (d, *J* = 7.7 Hz, 2H), 7.60-7.55 (m, 3H), 7.47-7.45 (m, 3H), 7.29-7.28 (m, 3H), 7.13 (d, *J* = 8.4 Hz, 1H);

**<sup>13</sup>C NMR** (175 MHz, CDCl<sub>3</sub>): δ 144.0, 131.5, 128.9, 128.7, 128.6, 128.5, 128.3, 128.2, 128.1, 127.4, 126.3, 123.0, 122.7, 120.7, 117.1, 91.5, 83.6 and 18.3;

**ESI-MS** calcd for C<sub>22</sub>H<sub>16</sub>N<sub>2</sub> (M+H)<sup>+</sup>: 308.1313, found: 309.1398.

**IR** (KBr): ν = 3339, 2955, 2922, 2852, 1737, 1669, 1600, 1538, 1495, 1378, 1341, 1276, 1163, 1123, 1089, 972, 951, 889, 852, 758, 721, 694, 577, 529 cm<sup>-1</sup>.

### 7-Chloro-3-phenyl-2-(phenylethynyl)imidazo[1,2-a]pyridine (21)

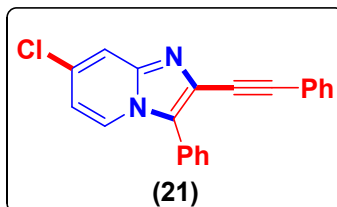

The product obtained as a Pale yellow oil in 36.4% (59.8 mg) yield.

**<sup>1</sup>H NMR** (400 MHz, CDCl<sub>3</sub>): δ 8.18 (d, *J* = 7.2 Hz, 1H), 7.70-7.68 (m, 3H), 7.65-7.54 (m, 2H), 7.49-7.45 (m, 3H), 7.30-7.29 (m, 3H), 6.82 (dd, *J* = 7.6 Hz, 1H);

**<sup>13</sup>C NMR** (175 MHz, CDCl<sub>3</sub>): δ 144.4, 132.6, 132.4, 131.7, 129.2, 129.1, 128.9, 128.8, 128.6, 128.3, 128.0, 127.5, 127.2, 123.7, 122.6, 116.4, 115.0, 92.8 and 82.6;

**ESI-MS** calcd for C<sub>21</sub>H<sub>13</sub>ClN<sub>2</sub> (M+Na): 328.0767, found: 351.0664.

**IR** (KBr): ν = 3280, 3060, 2954, 2923, 2851, 2220, 1953, 1734, 1680, 1627, 1597, 1565, 1492, 1442, 1399, 1377, 1350, 1283, 1251, 1220, 1188, 1125, 1092, 1065, 1027, 995, 948, 896, 853, 819, 780, 732, 698, 671, 529, 451 cm<sup>-1</sup>.

### 3-Butyl-2-(hex-1-ynyl)imidazo[1,2-a]pyridine (24)

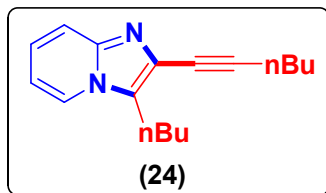

The product obtained as a Yellow oil in 77.3% (98.3 mg) yield.

**<sup>1</sup>H NMR** (400 MHz, CDCl<sub>3</sub>): δ 7.80 (t, *J*= 6.8 Hz, 1H), 7.50 (q, *J*= 9.2 Hz, 1H), 7.12-7.08 (m, 1H), 6.78-6.74 (m, 1H), 2.92 (t, *J*= 7.2 Hz, 2H), 2.44 (t, *J*= 6.8 Hz, 3H), 1.66-1.22 (m, 9H), 0.93-0.89 (m, 6H);

**<sup>13</sup>C NMR** (175 MHz, CDCl<sub>3</sub>): δ 143.8, 127.0, 126.6, 123.9, 122.7, 117.5, 112.3, 93.9, 73.9, 30.6, 29.3, 23.1, 22.2, 21.9, 19.2, 13.7 and 13.6;

**ESI-HRMS** calcd for C<sub>17</sub>H<sub>22</sub>N<sub>2</sub> (M+Na): 254.1783, found: 277.1679.

**IR** (KBr): ν = 3272, 3021, 2957, 2930, 2871, 2860, 2234, 1748, 1632, 1599, 1569, 1486, 1440, 1406, 1379, 1364, 1287, 1271, 1246, 1168, 1151, 1128, 1081, 1018, 981, 953, 854, 826, 774, 751, 736, 622, 522, 485 cm<sup>-1</sup>.

### 2-(Hept-1-yn-1-yl)-3-pentylimidazo[1,2-a]pyridine (25)

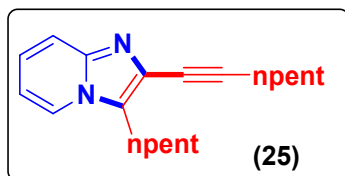

The product obtained as a Pale yellow oil in 79.2% (111.8 mg) yield.

**<sup>1</sup>H NMR** (400 MHz, CDCl<sub>3</sub>): δ 7.82 (d, *J*= 6.8 Hz, 1H), 7.49 (d, *J*= 8.8 Hz, 1H), 7.12 (t, *J*= 7.6 Hz, 1H), 6.76 (t, *J*= 6.8 Hz, 1H), 2.93 (t, *J*= 7.6 Hz, 2H), 2.44 (t, *J*= 7.6 Hz, 2H), 1.68-1.60 (m, 4H), 1.36-1.31 (m, 7H), 0.91-0.85 (m, 7H);

**<sup>13</sup>C NMR** (175 MHz, CDCl<sub>3</sub>): δ 149.6, 148.1, 143.9, 138.5, 138.2, 127.1, 123.8, 122.7, 117.6, 112.3, 93.9, 73.9, 71.6, 31.3, 31.1, 28.3, 26.9, 23.3, 22.3, 22.2, 19.5, 14.0 and 13.9;

**ESI-HRMS** calcd for C<sub>19</sub>H<sub>26</sub>N<sub>2</sub> (M+Na): 282.2096, found: 305.1996.

**IR** (KBr): ν = 3357, 3190, 2956, 2924, 2853, 2236, 1747, 1679, 1659, 1599, 1505, 1467, 1435, 1377, 1365, 1299, 1245, 1144, 965, 738, 669, 484 cm<sup>-1</sup>.

### 3-isopentyl-2-(5-methylhex-1-yn-1-yl)imidazo[1,2-a]pyridine (26)

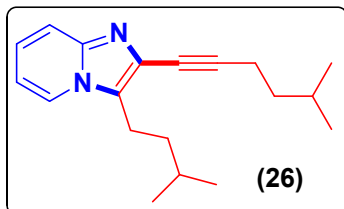

The product obtained as a Pale yellow oil 73.2% (103.4 mg) yield.

**<sup>1</sup>H NMR** (700 MHz, CDCl<sub>3</sub>): δ 7.79 (d, *J* = 7.0 Hz, 1H), 7.46 (d, *J* = 9.1 Hz, 1H), 7.09-7.06 (m, 1H), 6.74 (t, *J* = 7.0 Hz, 1H), 2.91 (t, *J* = 7.7 Hz, 2H), 2.44 (t, *J* = 7.7 Hz, 2H), 1.79-1.77 (m, 1H), 1.58 (t, *J* = 6.3 Hz, 1H), 1.52-1.47 (m, 2H), 0.94 (d, *J* = 6.3 Hz, 6H), 0.93 (d, *J* = 6.3 Hz, 6H);

**<sup>13</sup>C NMR** (175 MHz, CDCl<sub>3</sub>): δ 143.9, 127.1, 126.6, 123.7, 122.6, 121.5, 117.5, 114.3, 112.2, 93.8, 73.9, 37.4, 35.9, 27.6, 27.0, 22.3, 22.2, 22.1, 21.3 and 17.5;

**ESI-HRMS** calcd for C<sub>19</sub>H<sub>26</sub>N<sub>2</sub> (M+H)<sup>+</sup>: 282.2096, found: 283.2176.

**IR** (KBr): ν = 3079, 2955, 2928, 2869, 2235, 1748, 1680, 1633, 1590, 1545, 1467, 1401, 1385, 1366, 1269, 1245, 1204, 1168, 1132, 918, 825, 750, 735 cm<sup>-1</sup>.

### 3-benzyl-2-(3-phenylprop-1-yn-1-yl)imidazo[1,2-a]pyridine (27)

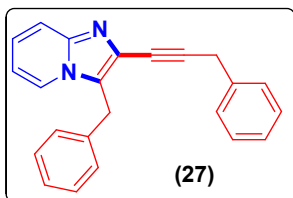

The product obtained as a Pale yellow oil 67.9% (109.5 mg) yield.

**<sup>1</sup>H NMR** (700 MHz, CDCl<sub>3</sub>): δ 7.63 (d, *J* = 7.0 Hz, 1H), 7.51 (d, *J* = 9.1 Hz, 1H), 7.42 (d, *J* = 7.7 Hz, 2H), 7.28 (t, *J* = 7.7 Hz, 2H), 7.24 (t, *J* = 7.7 Hz, 2H), 7.21-7.18 (m, 2H), 7.16 (d, *J* = 7.0 Hz, 2H), 7.09 (t, *J* = 8.4 Hz, 1H), 6.30 (t, *J* = 6.3 Hz, 1H), 4.33 (s, 2H), 3.88 (s, 2H);

**<sup>13</sup>C NMR** (175 MHz, CDCl<sub>3</sub>): δ 144.3, 136.4, 136.2, 128.7, 128.4, 128.1, 127.9, 127.6, 126.7, 126.5, 125.3, 124.4, 123.1, 117.4, 112.4, 91.0, 76.0, 29.6 and 25.8;

**EI-HRMS** calcd for C<sub>23</sub>H<sub>18</sub>N<sub>2</sub> (M+H)<sup>+</sup>: 322.1470, found: 323.1547.

**IR** (KBr): ν = 3360, 3182, 3137, 3084, 3061, 2923, 2852, 2238, 1950, 1747, 1660, 1603, 1584, 1547, 1495, 1422, 1364, 1270, 1249, 1186, 1136, 1116, 1075, 1029, 1003, 940, 889, 824, 748, 722, 696, 615, 594, 586, 489 cm<sup>-1</sup>.

**3-(((tetrahydro-2H-pyran-2-yl)oxy)methyl)-2-(3-(((tetrahydro-2H-pyran-2-yl)oxy)prop-1-yn-1-yl)imidazo[1,2-a]pyridine (28)**

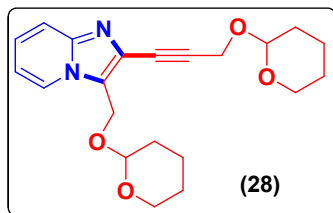

The product obtained as a Yellow oil 58.2% (107.8 mg) yield.

**<sup>1</sup>H NMR** (700 MHz, CDCl<sub>3</sub>): δ 8.13 (d, *J*= 7.0 Hz, 1H), 7.48 (d, *J*= 9.1 Hz, 1H), 7.17 (t, *J*= 8.4 Hz, 1H), 6.79 (t, *J*= 7.0 Hz, 1H), 5.00 (dd, *J*= 2.3, 13.3 Hz, 1H), 4.90 (dd, *J*= 3.5, 14.0 Hz, 2H), 4.61 (s, 1H), 4.50 (s, 2H), 3.89-3.81 (m, 2H), 3.52-3.49 (m, 2H), 1.78-1.69 (m, 3H), 1.62-1.44 (m, 9H);

**<sup>13</sup>C NMR** (175 MHz, CDCl<sub>3</sub>): δ 145.05, 128.0, 125.5, 124.3, 123.8, 117.5, 112.8, 98.0, 96.6, 88.9, 78.4, 62.9, 62.0, 57.3, 54.5, 30.3, 30.2, 30.2, 25.3, 25.2, 19.6 and 19.0;

**EI-HRMS** calcd for C<sub>21</sub>H<sub>26</sub>N<sub>2</sub>O<sub>4</sub> (M+Na): 370.1893, found: 393.1789.

**IR** (KBr): ν = 3081, 2940, 2867, 2851, 2234, 1684, 1634, 1554, 1501, 1453, 1389, 1364, 1352, 1272, 1201, 1182, 1152, 1118, 1076, 1024, 969, 945, 902, 870, 815, 754, 737, 480 cm<sup>-1</sup>.

**3-cyclopropyl-2-(cyclopropylethynyl)imidazo[1,2-a]pyridine (29)**

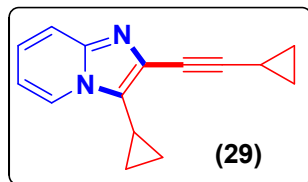

The product obtained as a Pale yellow oil 66.1% (73.5 mg) yield.

**<sup>1</sup>H NMR** (400 MHz, CDCl<sub>3</sub>): δ 8.10-8.08 (m, 1H), 7.45-7.43(m, 1H), 7.15-7.11 (m, 1H), 6.81-6.77 (m, 1H), 1.80-1.75 (m, 2H), 1.50-1.47 (m, 1H), 1.22 (s, 1H), 1.07-1.02 (m, 2H), 0.93 (m, 2H), 0.87-0.84 (m, 2H);

**<sup>13</sup>C NMR** (175 MHz, CDCl<sub>3</sub>): δ 143.6, 127.0, 126.6, 124.5, 123.1, 117.2, 112.3, 97.2, 69.4, 8.6, 5.1, 3.9, and 0.3;

**EI-HRMS** calcd for C<sub>15</sub>H<sub>14</sub>N<sub>2</sub> (M+H): 222.1157, found: 223.1234.



**IR** (KBr):  $\nu = 3088, 3008, 2955, 2923, 2851, 2233, 1732, 1662, 1632, 1594, 1551, 1463, 1418, 1378, 1341, 1270, 1237, 1198, 1168, 1144, 1118, 1051, 1026, 989, 926, 879, 854, 812, 752, 738, 516, 464 \text{ cm}^{-1}$ .

### 3-(trimethylsilyl)-2-((trimethylsilyl)ethynyl)imidazo[1,2-a]pyridine (30)

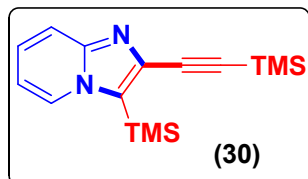

The product obtained as a Light brown liquid 69.8% (100.0 mg) yield.

**$^1\text{H}$  NMR** (700 MHz,  $\text{CDCl}_3$ ):  $\delta$  8.10 (d,  $J = 6.3$  Hz, 1H), 7.54 (d,  $J = 9.1$  Hz, 1H), 7.17-7.15 (m, 1H), 6.76-6.74 (m, 1H), 0.46 (s, 9H), 0.22 (s, 9H);

**$^{13}\text{C}$  NMR** (175 MHz,  $\text{CDCl}_3$ ):  $\delta$  147.6, 136.2, 126.5, 125.9, 125.5, 125.4, 117.9, 117.8, 112.9, 112.7, 100.4, 97.4, 80.1, -0.4 and -0.8;

**EI-HRMS** calcd for  $\text{C}_{15}\text{H}_{22}\text{N}_2\text{Si}_2$  (M+H): 286.1322, found: 287.1398.

**IR** (KBr):  $\nu = 3310, 2957, 2926, 2854, 2161, 1735, 1634, 1600, 1501, 1458, 1437, 1377, 1341, 1299, 1251, 1150, 1074, 1003, 932, 881, 842, 760, 736, 720, 698, 655, 628, 570 \text{ cm}^{-1}$ .

### 1-phenyl-2-(3-phenylimidazo[1,2-a]pyridin-2-yl)ethane-1,2-dione (31)

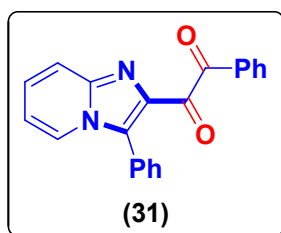

The product obtained as a pale yellow oil 98.1% (320.1 mg) yield.

**$^1\text{H}$  NMR** (400 MHz,  $\text{CDCl}_3$ ):  $\delta$  8.01 (dd,  $J = 6.0, 7.6$  Hz, 1H), 7.92-7.90 (m, 2H), 7.66 (d,  $J = 9.2$ , 1H), 7.59-7.55 (m, 1H), 7.54-7.50 (m, 2H), 7.49-7.47 (m, 3H), 7.26-7.21 (m, 1H), 6.83-6.79 (m, 1H);

**$^{13}\text{C}$  NMR** (175 MHz,  $\text{CDCl}_3$ ):  $\delta$  194.1, 191.1, 146.3, 145.0, 136.7, 134.3, 133.0, 130.4, 130.2, 129.9, 129.0, 128.7, 126.8, 126.6, 124.1, 119.6 and 114.4;

**ESI-MS** calcd for  $\text{C}_{21}\text{H}_{14}\text{N}_2\text{O}_2$  (M+Na): 326.1055, found: 349.0953.

**IR** (KBr):  $\nu = 3359, 3188, 3061, 2921, 2851, 1734, 1684, 1636, 1596, 1580, 1545, 1480, 1449, 1376, 1359, 1343, 1315, 1265, 1216, 1179, 1143, 1074, 1010, 983, 940, 881, 754, 742, 726, 699, 672, 568, 483 \text{ cm}^{-1}$ .

**2-ethynylimidazo[1,2-a]pyridine (32)**

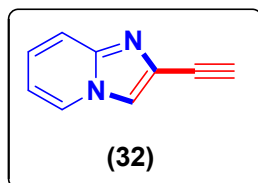

The product obtained as a Light brown liquid 99.0% (70.3 mg) yield.

**$^1\text{H NMR}$**  (700 MHz,  $\text{CDCl}_3$ ):  $\delta$  8.03 (d,  $J = 6.3 \text{ Hz}$ , 1H), 7.7 (s, 1H), 7.54 (d,  $J = 9.1 \text{ Hz}$ , 1H), 7.18 (t,  $J = 7.7 \text{ Hz}$ , 1H), 6.79 (t,  $J = 6.3 \text{ Hz}$ , 1H);

**$^{13}\text{C NMR}$**  (175 MHz,  $\text{CDCl}_3$ ):  $\delta$  144.8, 127.3, 125.5, 125.4, 117.8, 116.2, 113.2 and 79.0;

**EI-HRMS** calcd for  $\text{C}_9\text{H}_6\text{N}_2$  (M+H): 142.0531, found: 143.0610.

**IR** (KBr):  $\nu = 3287, 3198, 3139, 3109, 3051, 2957, 2914, 2849, 2113, 1734, 1636, 1532, 1485, 1361, 1307, 1240, 1160, 1126, 1013, 976, 917, 831, 811, 752, 665, 558 \text{ cm}^{-1}$ .

## 6. Supporting references

- S1. Y. Sawama, M. Takubo, S. Mori, Y. Monguchi and H. Sajiki, *Eur. J. Org. Chem.*, 2011, **18**, 3361–3367.
- S2. W. Shi, Y. Luo, X. Luo, L. Chao, H. Zhang, J. Wang and A. Lei, *J. Am. Chem. Soc.*, 2008, **130**, 14713-14720.
- S3. Y. Okamoto and S. K. Kundu, *J. Phys. Chem.*, 1973, **77**, 2677.
- S4. V. P. Charpe, A. A. Hande, A. Sagadevan and K. C. Hwang, *Green Chem.*, 2018, **20**, 4859.
- S5. J. V. Morris, M. A. Mahaney and J. R. Huber, *J. Phys. Chem.*, 1976, **80**, 969-974.
- S6. Y. Gao, M. Yin, W. Wu, H. Huang and H. Jiang, *Adv. Synth. Catal.*, 2013, **355**, 2263;

## 1. $^1\text{H}$ NMR, $^{13}\text{C}$ NMR, and $^{19}\text{F}$ -NMR spectra

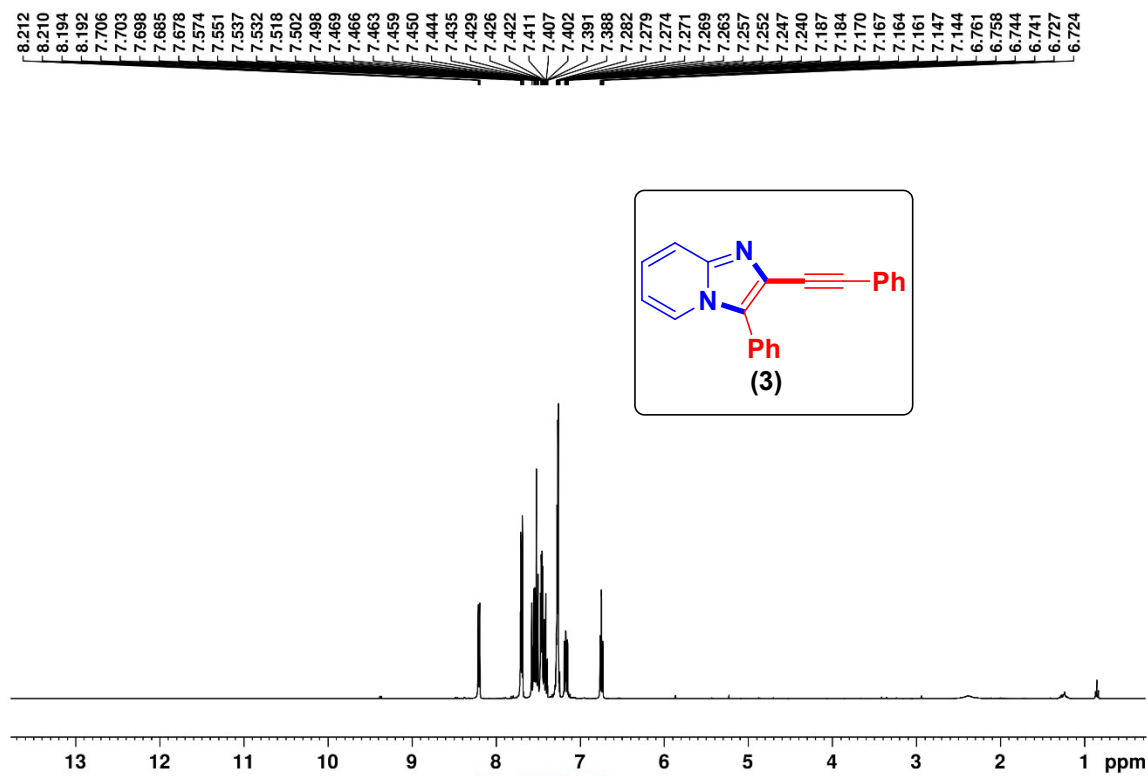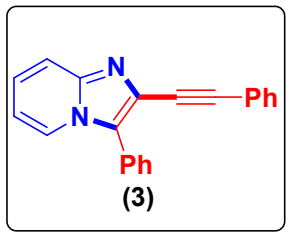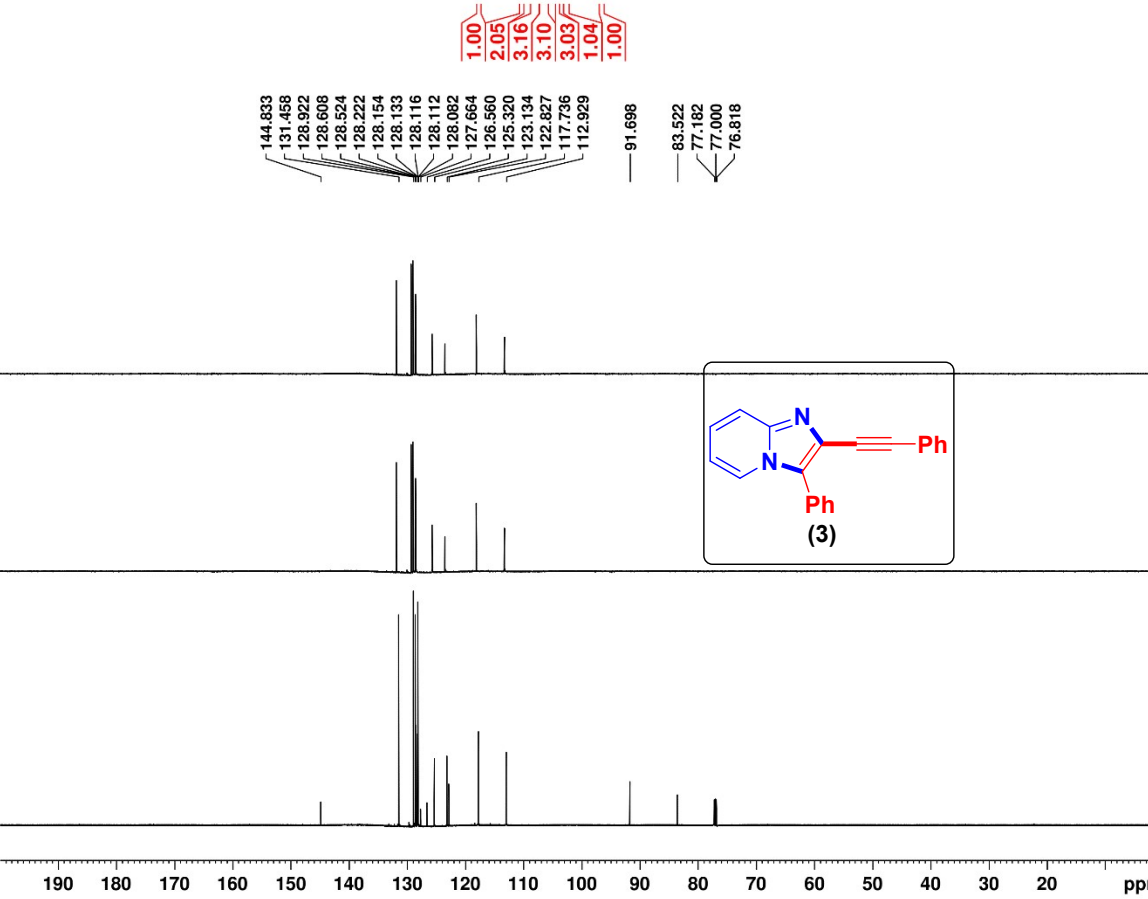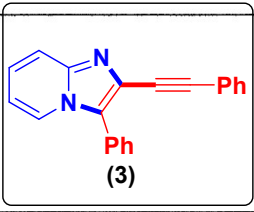

8.333  
8.330  
8.328  
8.315  
8.313  
8.311  
7.677  
7.648  
7.558  
7.554  
7.549  
7.537  
7.534  
7.530  
7.517  
7.511  
7.498  
7.494  
7.482  
7.479  
7.421  
7.417  
7.413  
7.404  
7.399  
7.393  
7.385  
7.381  
7.377  
7.240  
7.202  
7.199  
7.185  
7.182  
7.179  
7.176  
7.162  
7.159  
6.809  
6.806  
6.792  
6.789  
6.775  
6.772

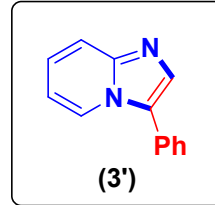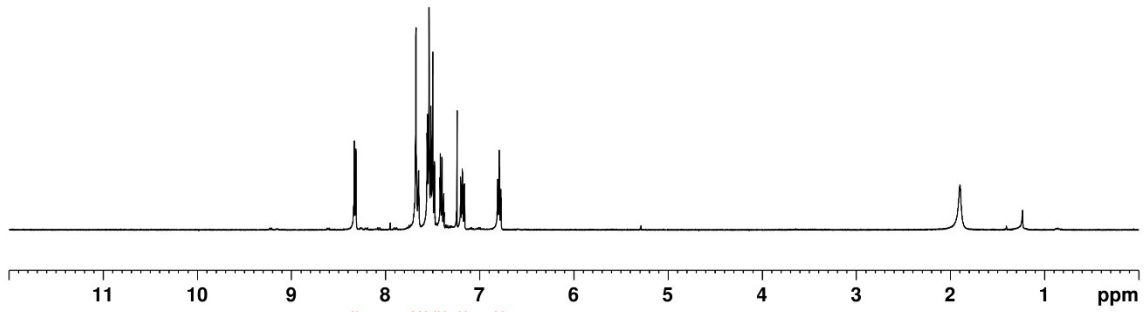

132.495  
129.294  
129.234  
129.222  
128.188  
128.051  
124.238  
123.341  
118.254  
112.540  
77.183  
77.001  
76.820

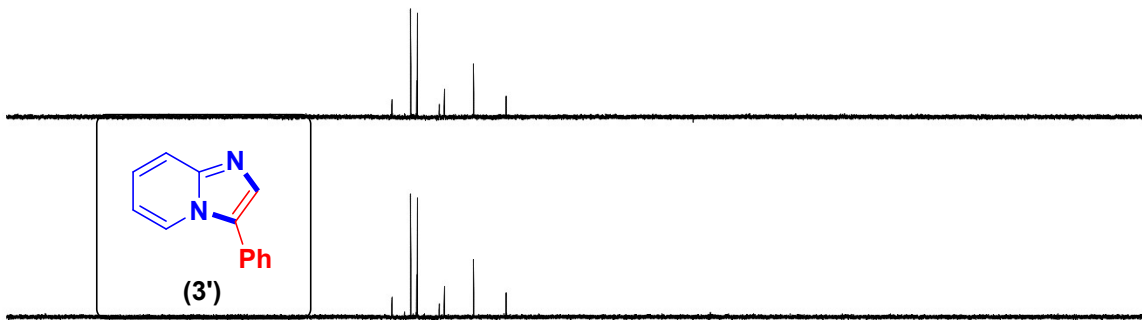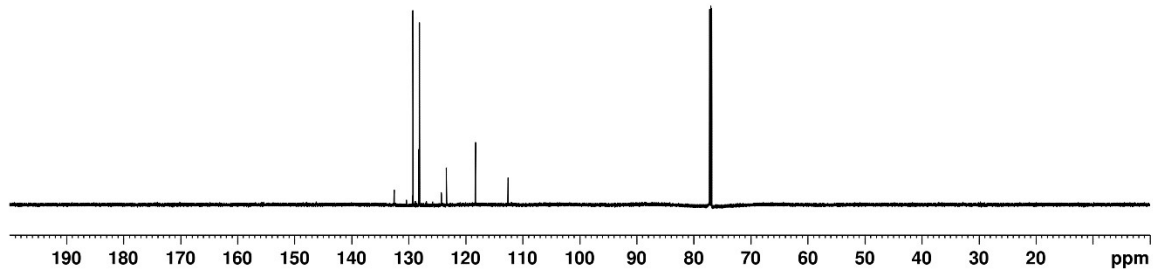

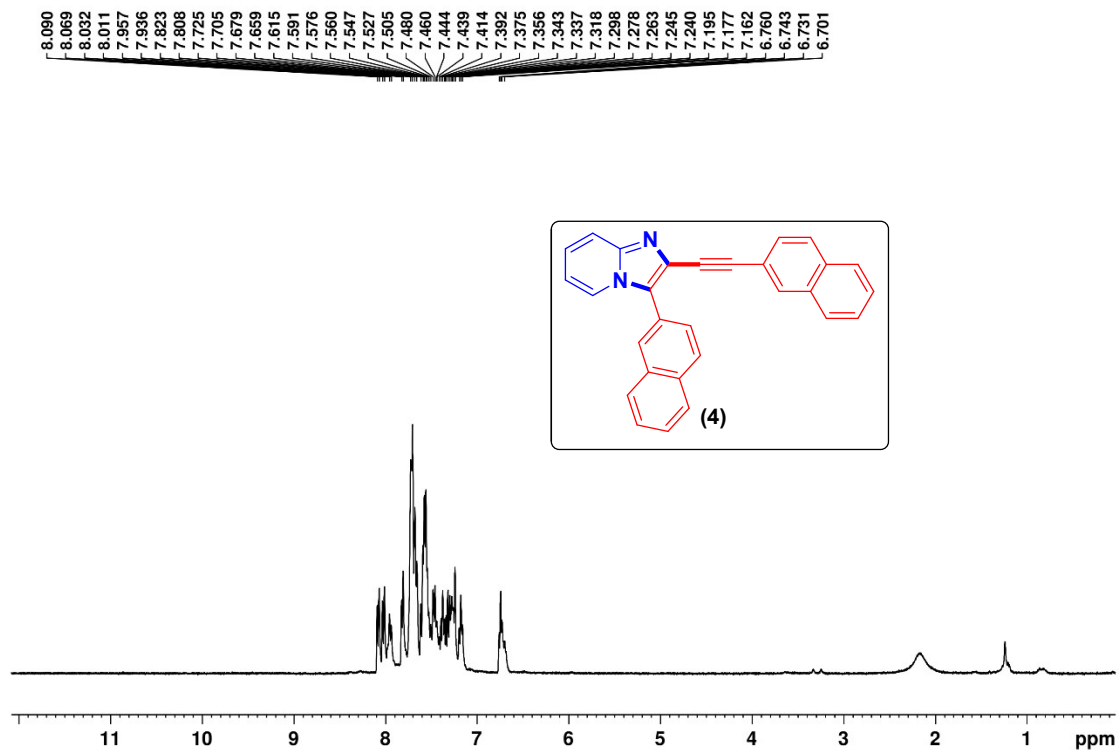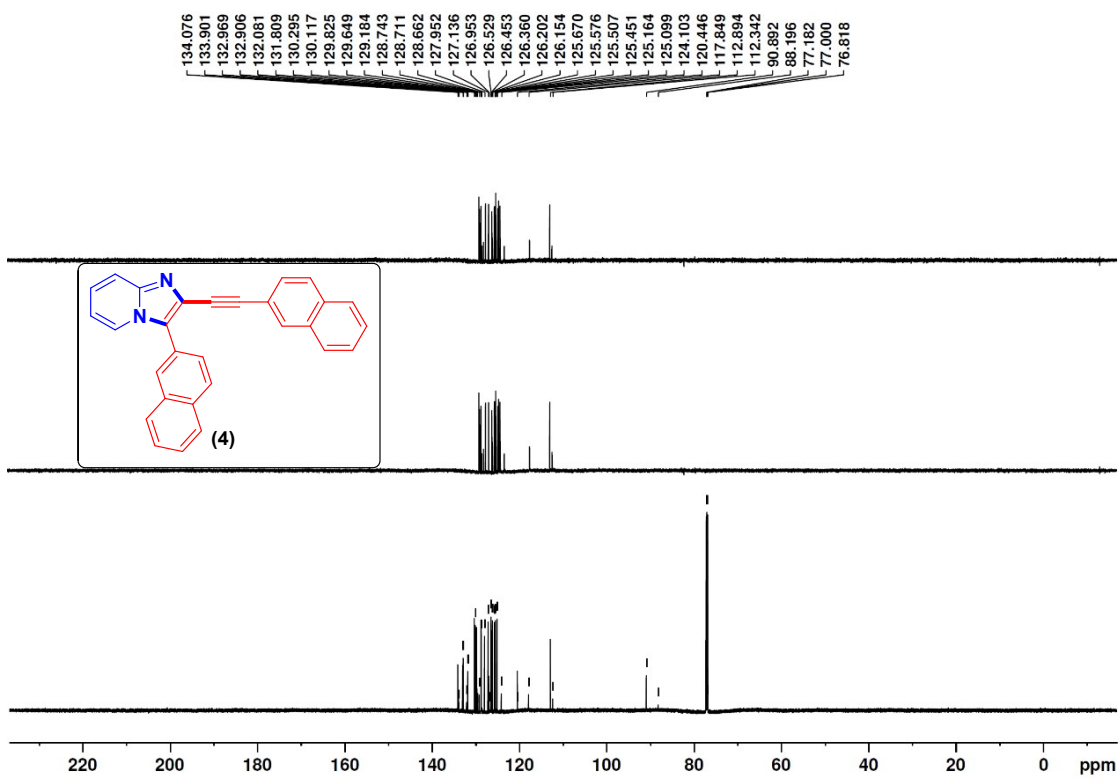

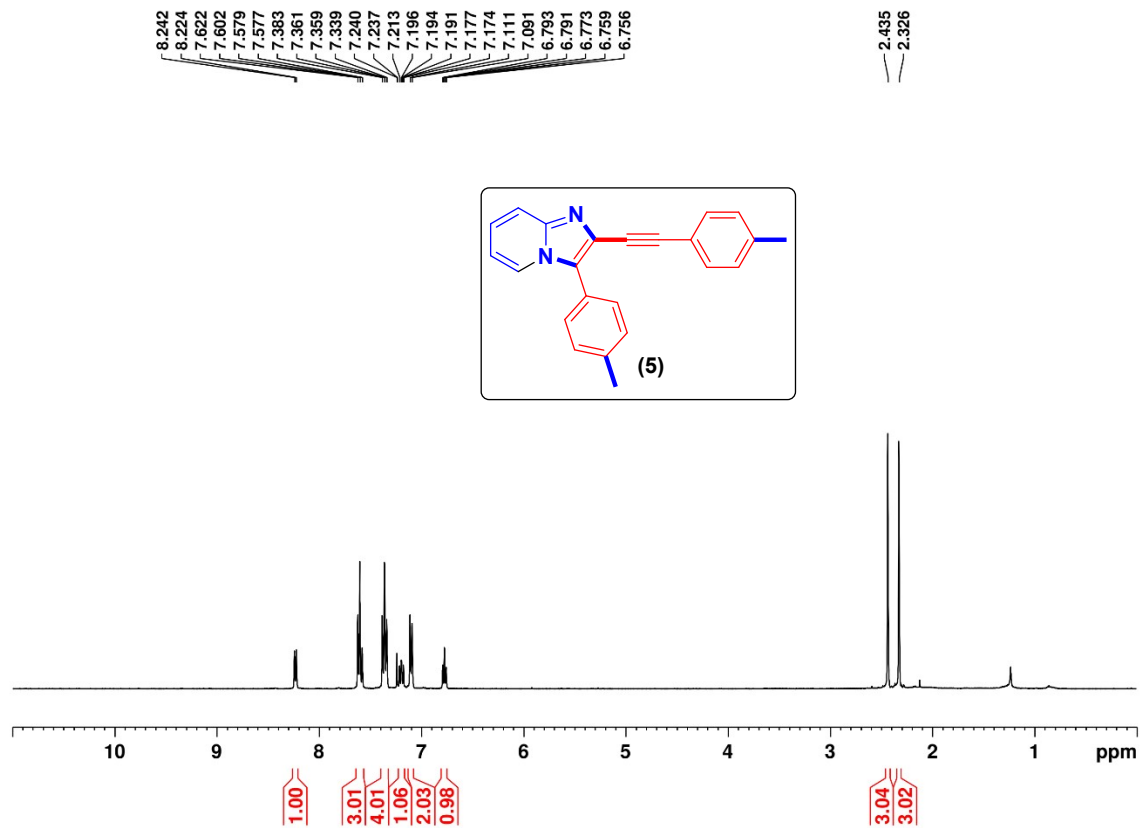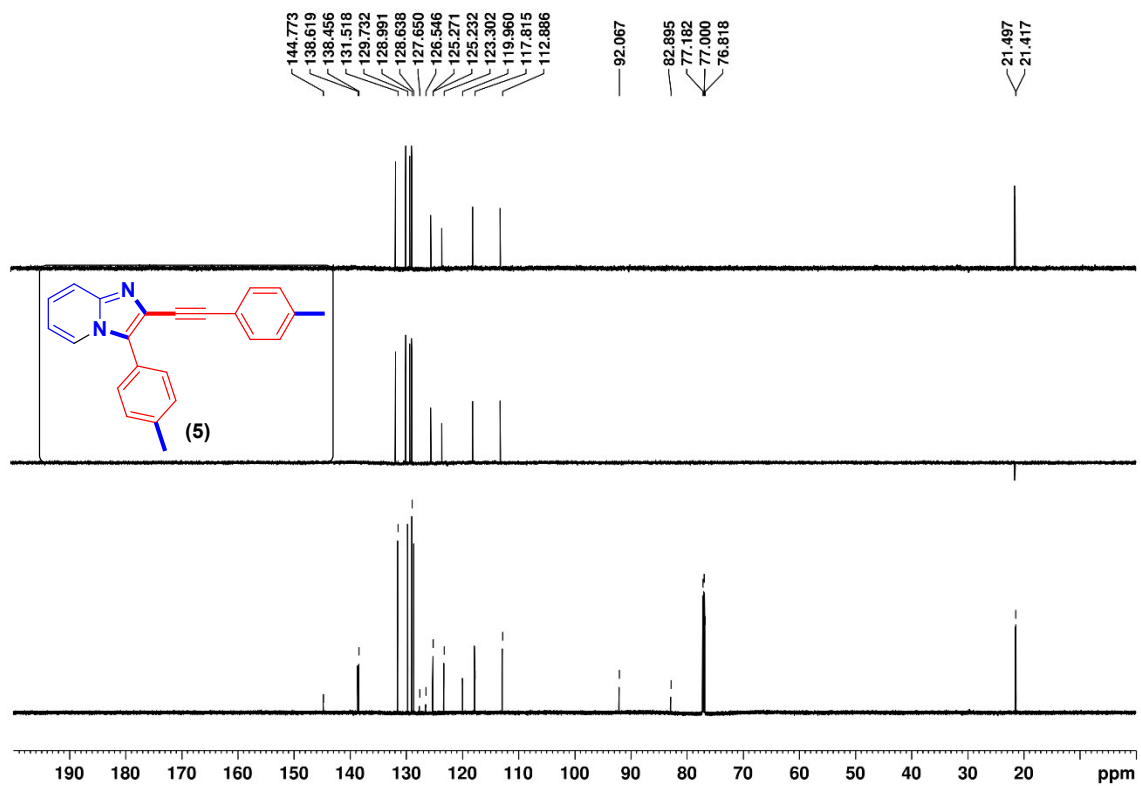



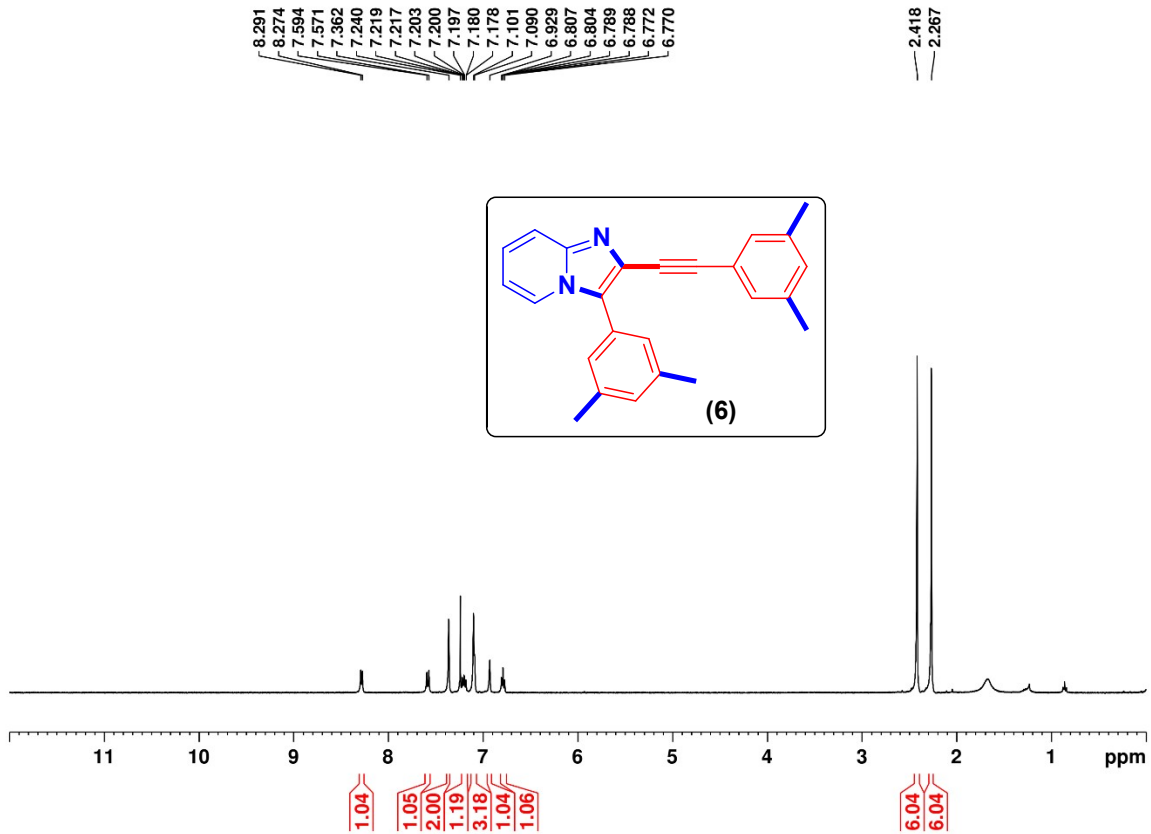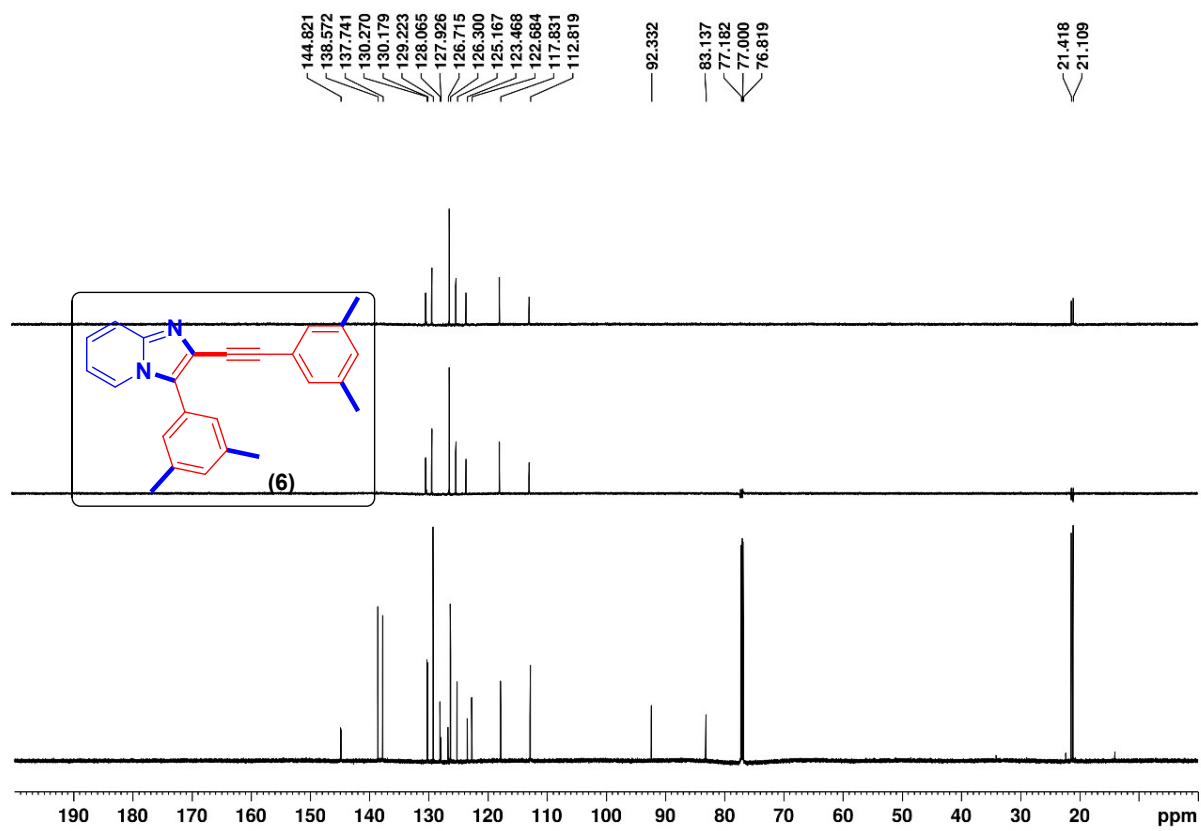

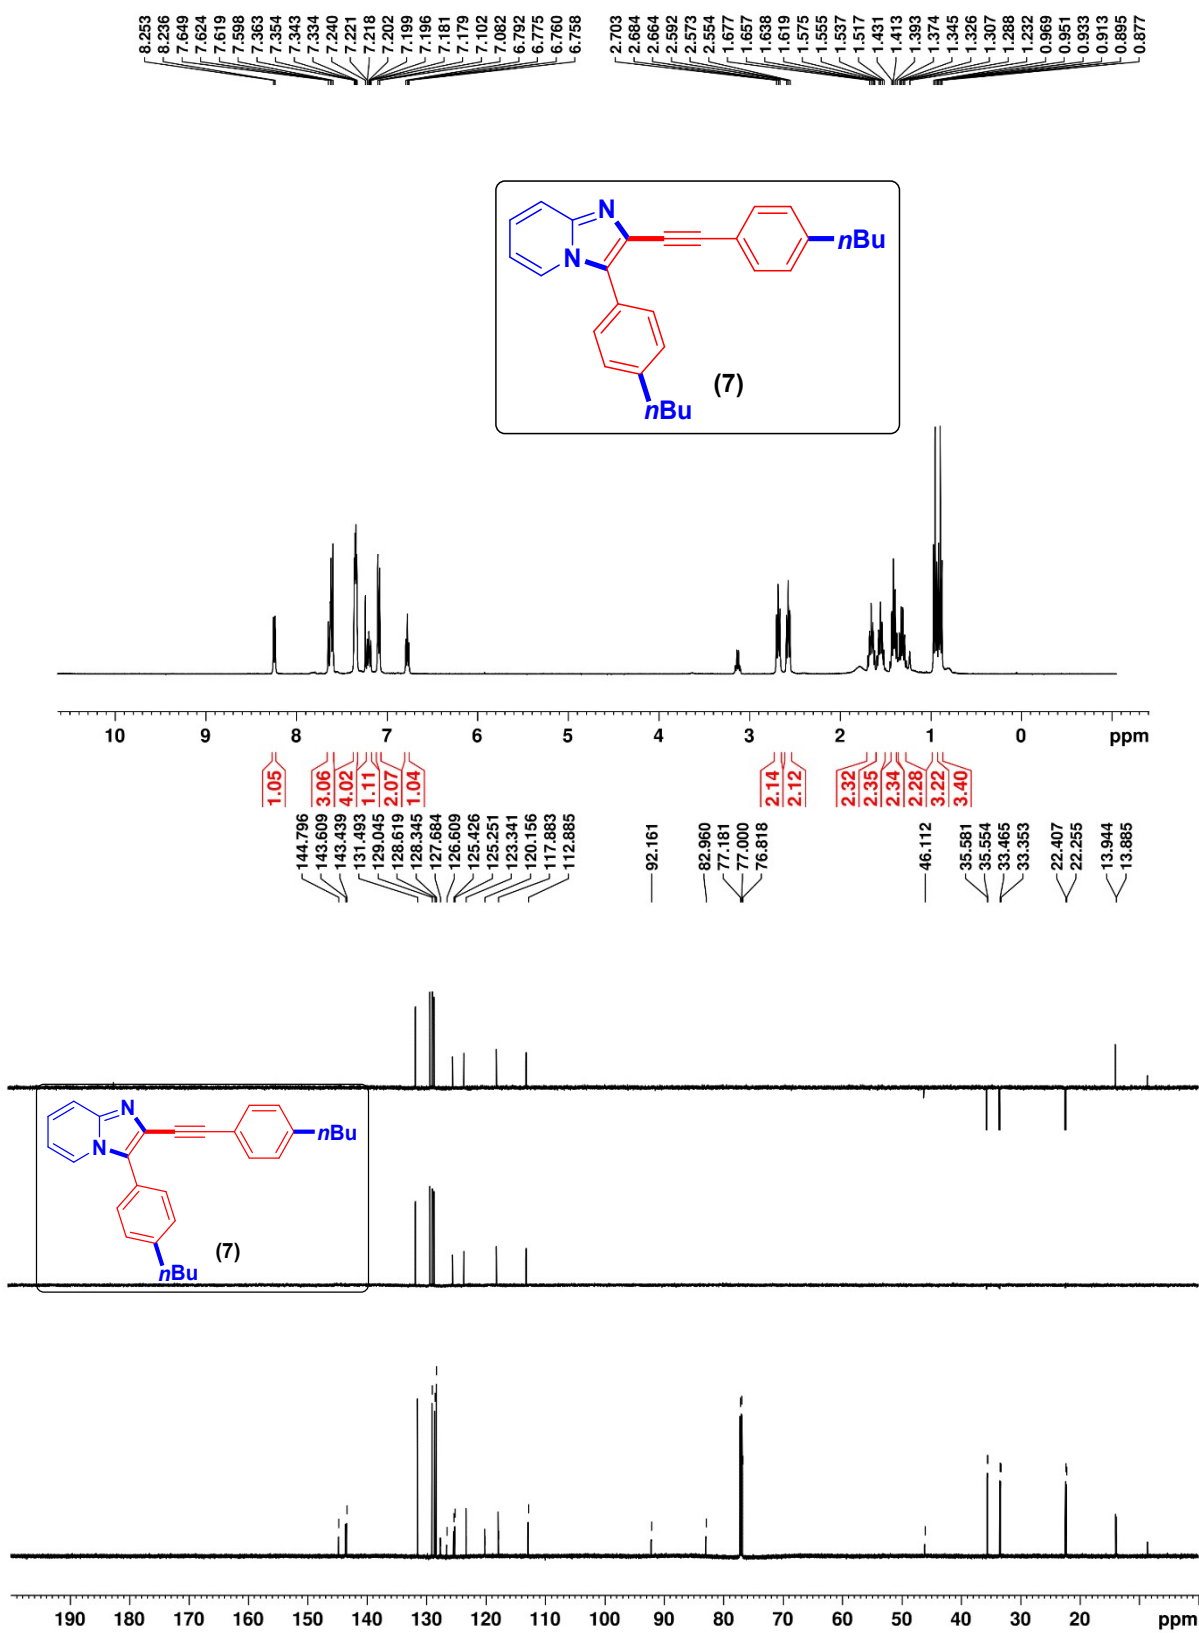

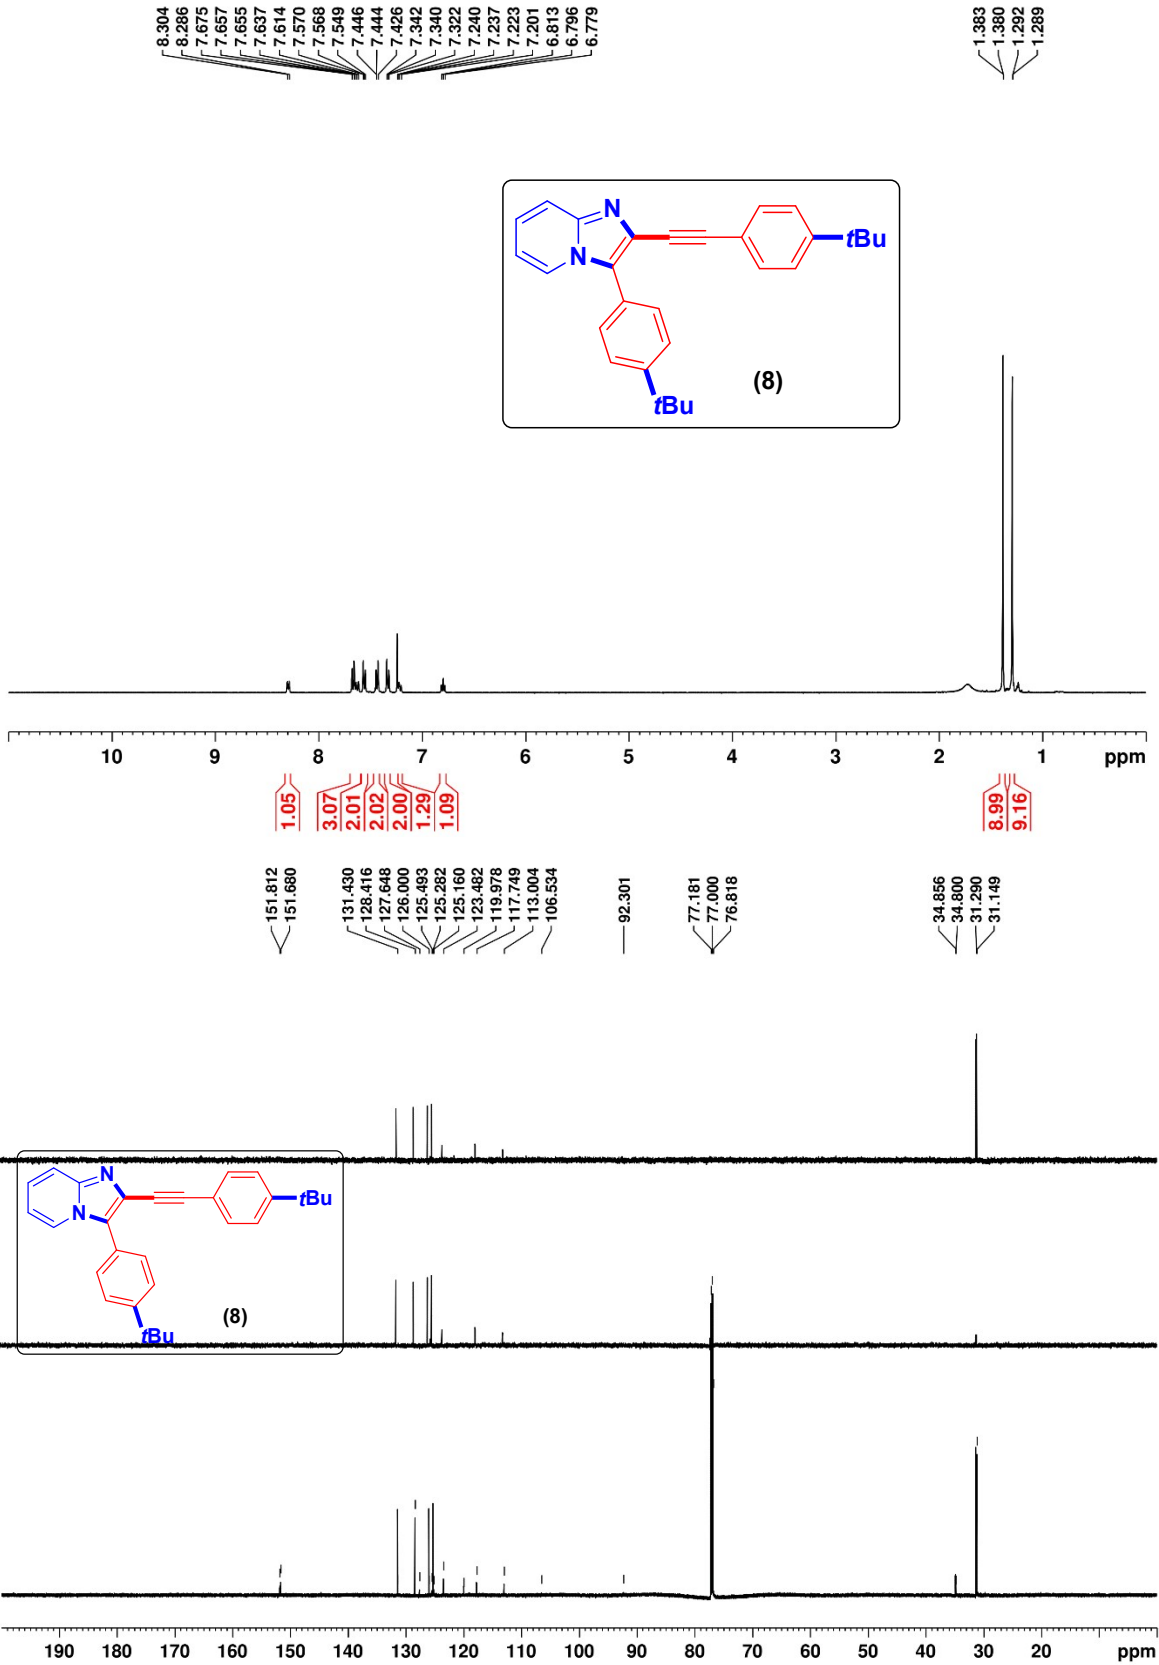

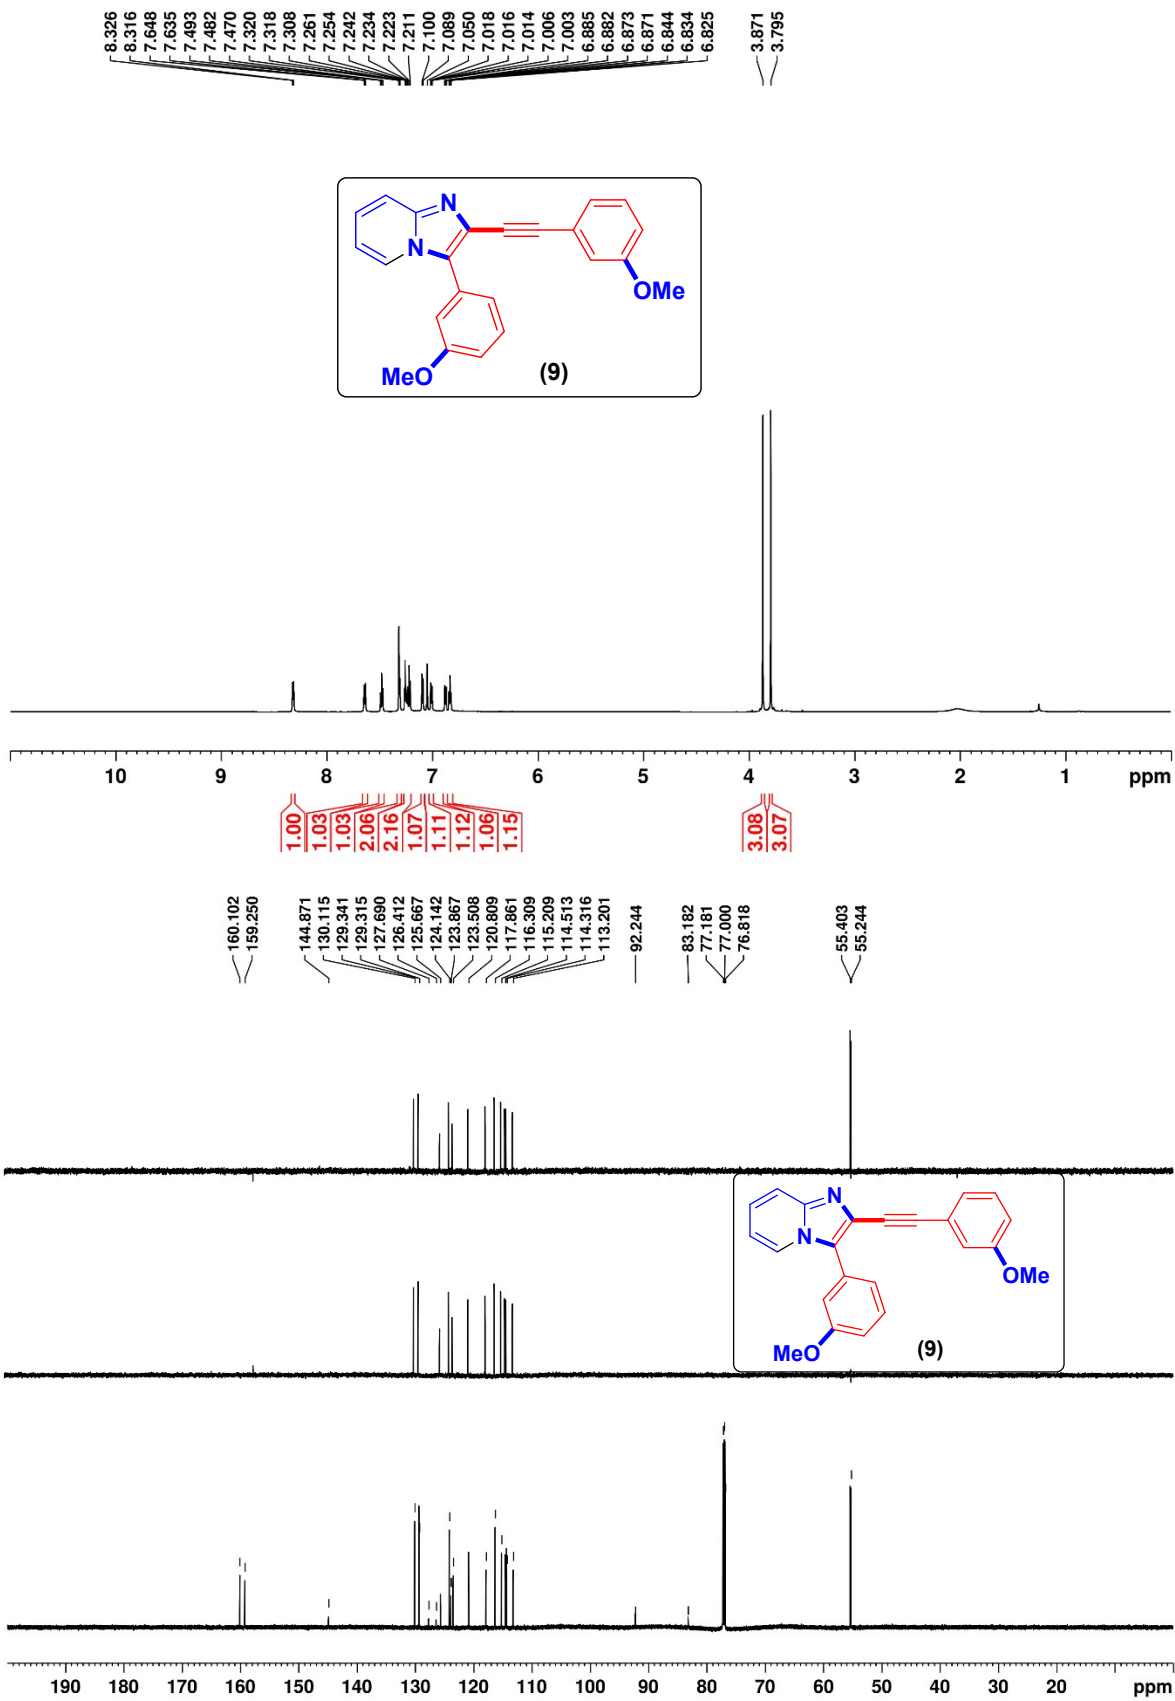

8.170  
8.168  
8.153  
8.150  
7.970  
7.949  
7.674  
7.654  
7.653  
7.600  
7.599  
7.578  
7.575  
7.568  
7.553  
7.547  
7.427  
7.407  
7.405  
7.305  
7.284  
7.240  
7.229  
7.226  
7.223  
7.220  
7.218  
7.203  
7.201  
6.824  
6.807  
6.790

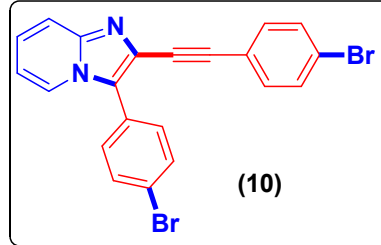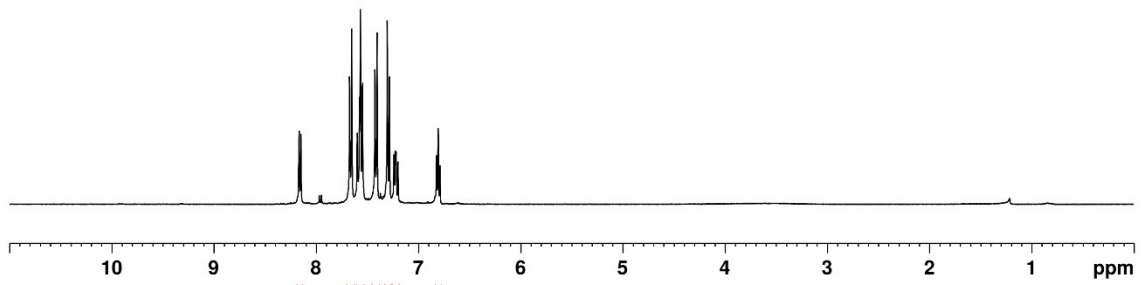

145.133  
132.965  
132.357  
131.585  
130.183  
127.000  
126.715  
126.559  
125.823  
123.063  
122.809  
121.588  
118.020  
113.451

91.120  
84.255  
77.182  
77.000  
76.818

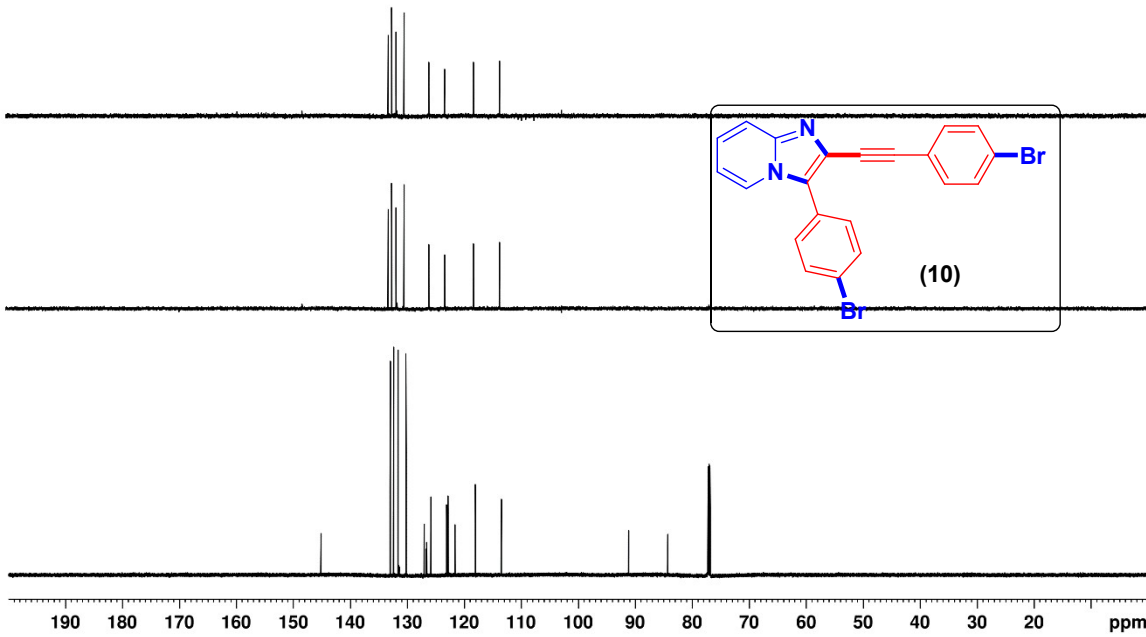

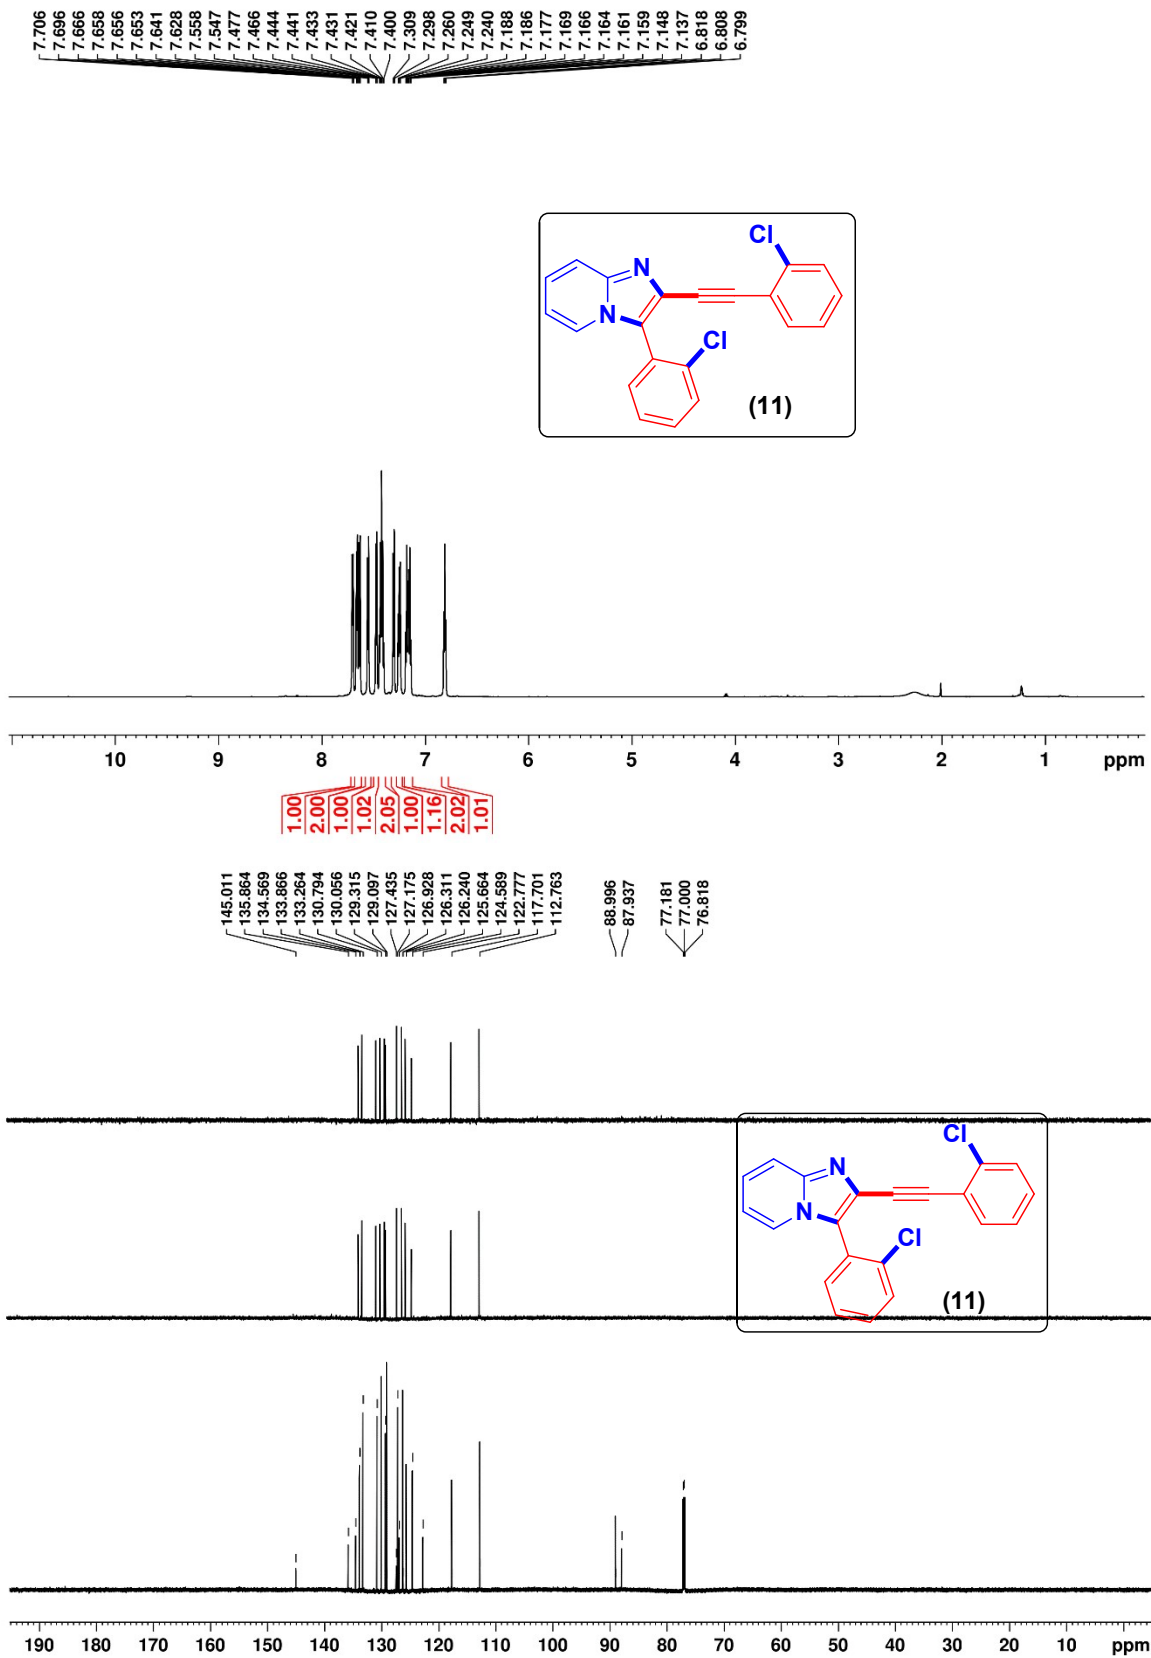

7.844  
7.835  
7.818  
7.775  
7.759  
7.754  
7.738  
7.733  
7.717  
7.654  
7.632  
7.480  
7.460  
7.444  
7.439  
7.423  
7.305  
7.288  
7.267  
7.253  
7.240  
7.213  
7.107  
7.093  
7.087  
7.072  
7.066  
7.055  
7.049  
7.034  
7.030  
7.024  
7.008  
7.002  
6.882  
6.864  
6.853  
6.849  
6.841  
6.834  
6.820  
6.813  
6.807  
6.791  
6.784

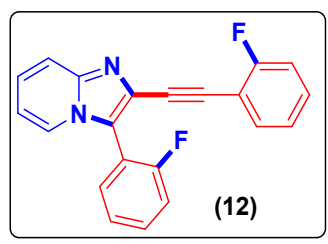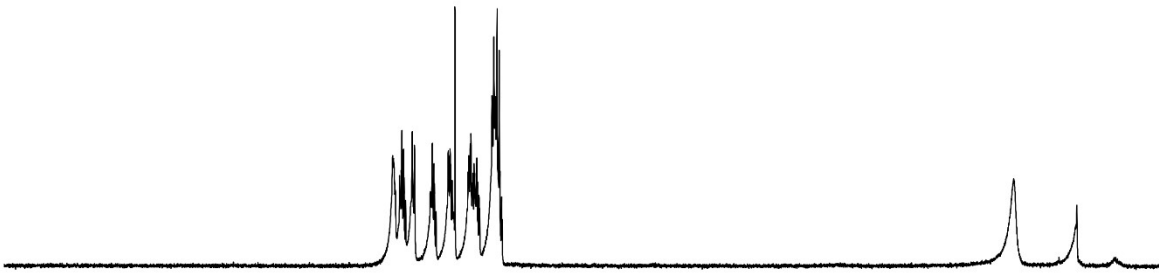

11 10 9 8 7 6 5 4 3 2 1 ppm

1.00  
1.21  
1.15  
1.28  
2.00  
3.01  
3.19

163.585  
163.038  
162.971  
162.479  
162.410  
162.212  
162.148  
160.841  
160.771  
159.406  
159.337  
145.332  
134.274  
134.259  
134.218  
134.204  
133.565  
133.538  
133.510  
133.482  
127.374  
125.979  
124.406  
124.376  
122.330  
117.829  
113.258  
112.436  
112.416  
112.315  
112.295  
111.715  
111.693  
111.590  
111.569  
107.744  
107.675  
107.653  
104.968  
104.823  
104.679  
104.415  
104.276  
104.268  
104.128  
87.430  
84.891  
77.182  
77.000  
76.818

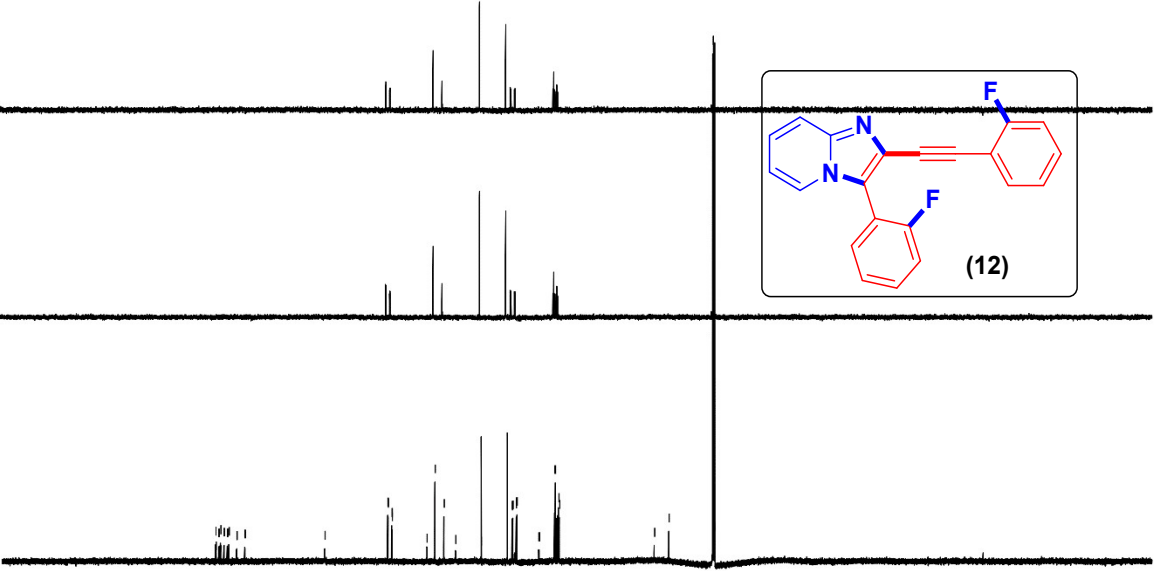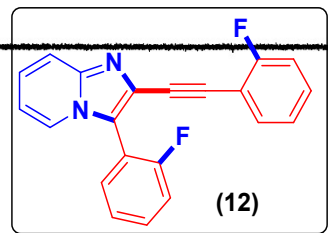

190 180 170 160 150 140 130 120 110 100 90 80 70 60 50 40 30 20 ppm

# <sup>19</sup>F-NMR

-57.101  
-61.235  
-62.861

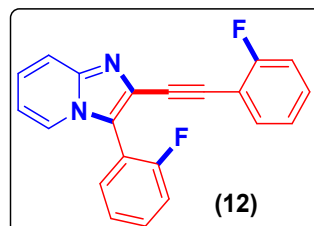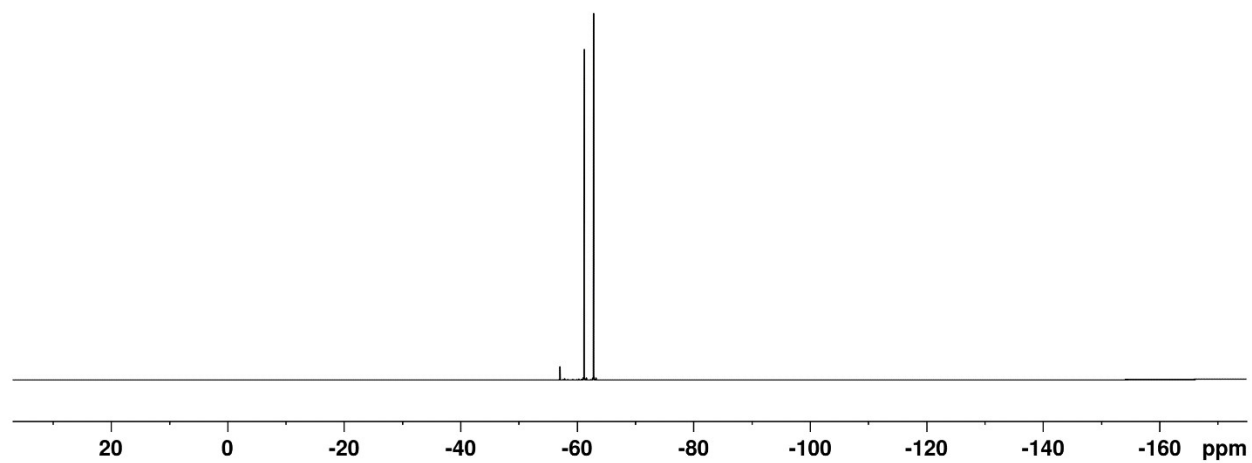



8.172  
8.155  
7.696  
7.691  
7.683  
7.674  
7.666  
7.662  
7.608  
7.585  
7.453  
7.448  
7.439  
7.431  
7.417  
7.281  
7.274  
7.268  
7.252  
7.240  
7.231  
7.209  
7.017  
6.995  
6.973  
6.831  
6.797

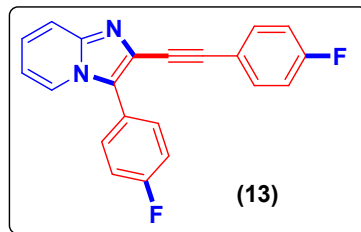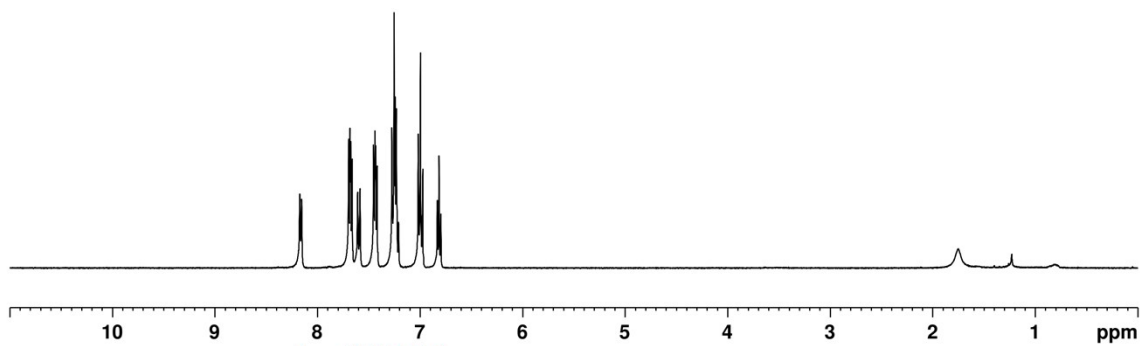

163.451  
163.304  
162.033  
161.882  
144.975  
133.535  
133.487  
130.822  
130.775  
126.781  
126.710  
125.505  
124.282  
123.053  
118.928  
118.908  
118.028  
116.365  
116.242  
115.704  
115.578  
113.235  
90.838  
82.996  
77.182  
77.000  
76.818

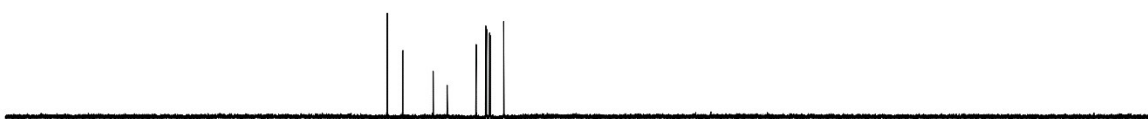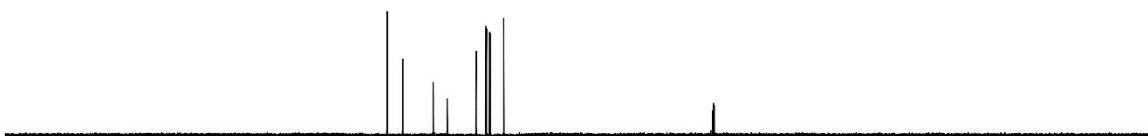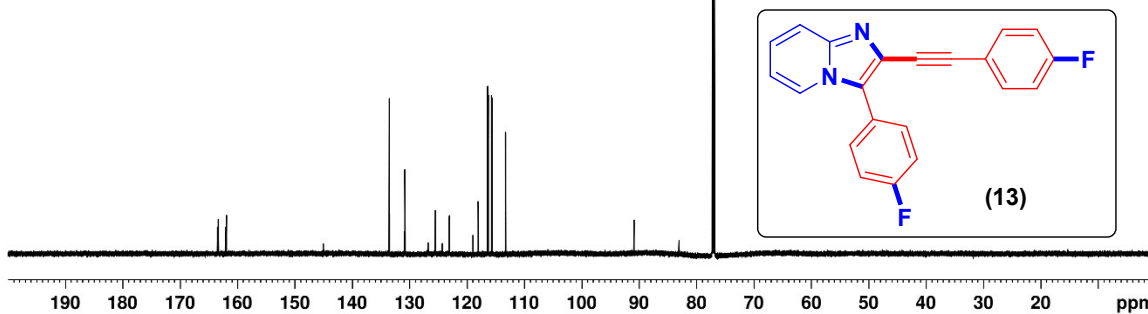

# $^{19}\text{F}$ -NMR

-110.196  
-111.270

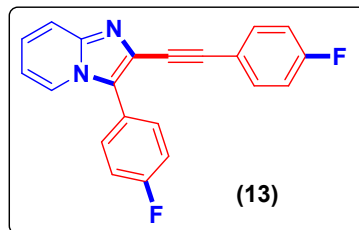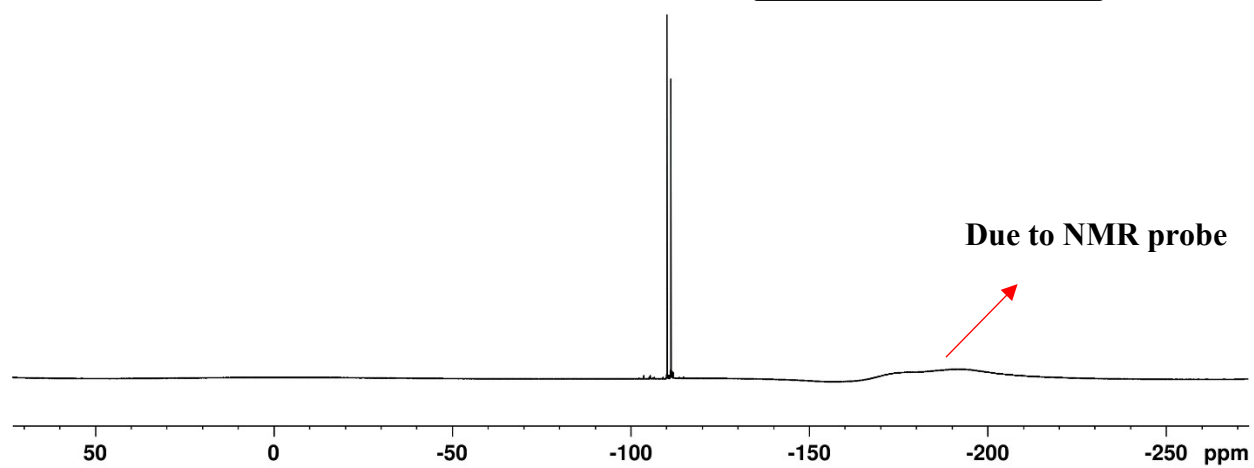

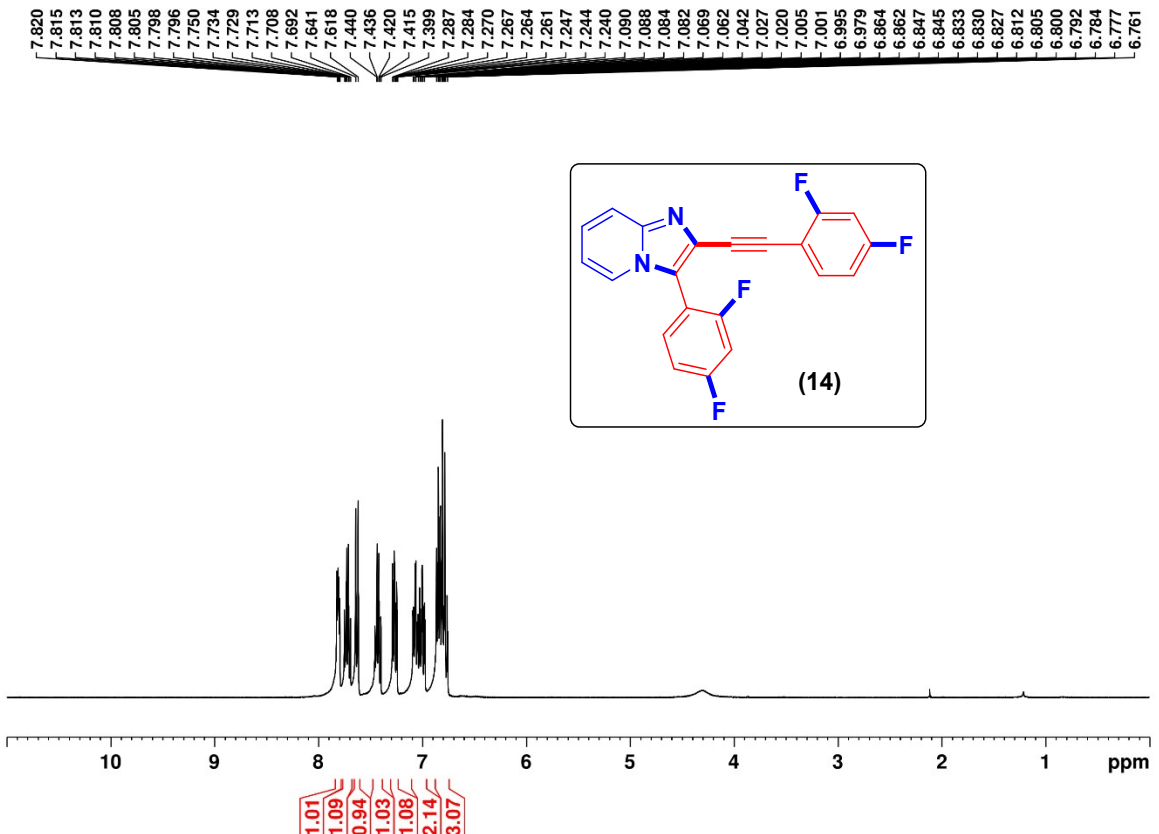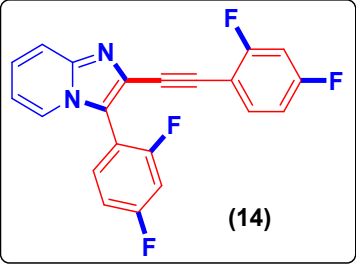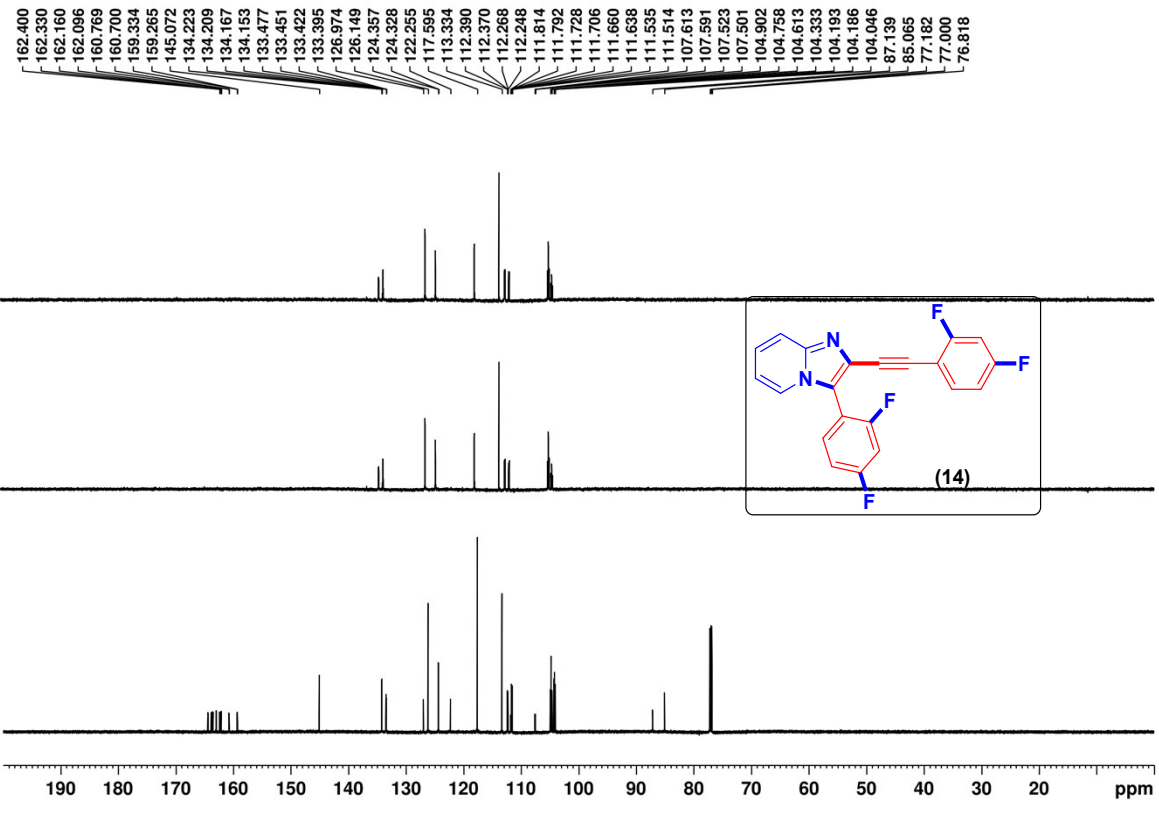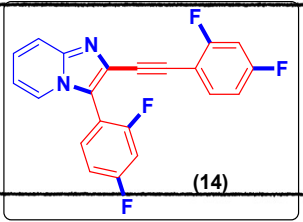

# <sup>19</sup>F-NMR

-104.677  
-104.696  
-105.256  
-105.273  
-105.976  
-106.778

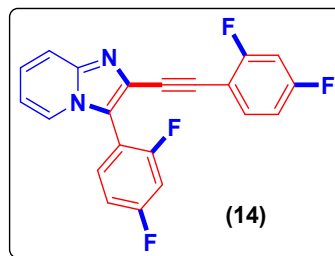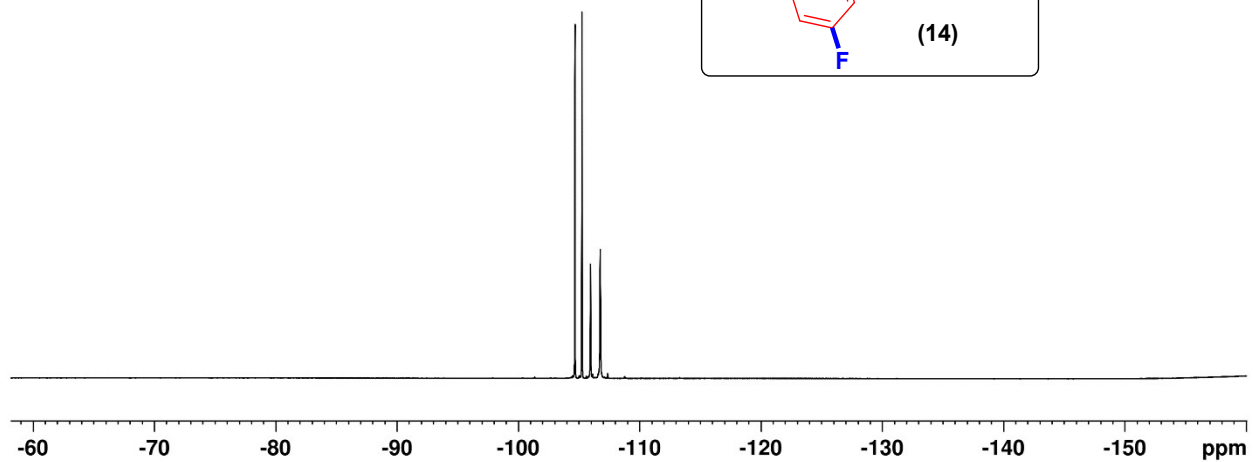

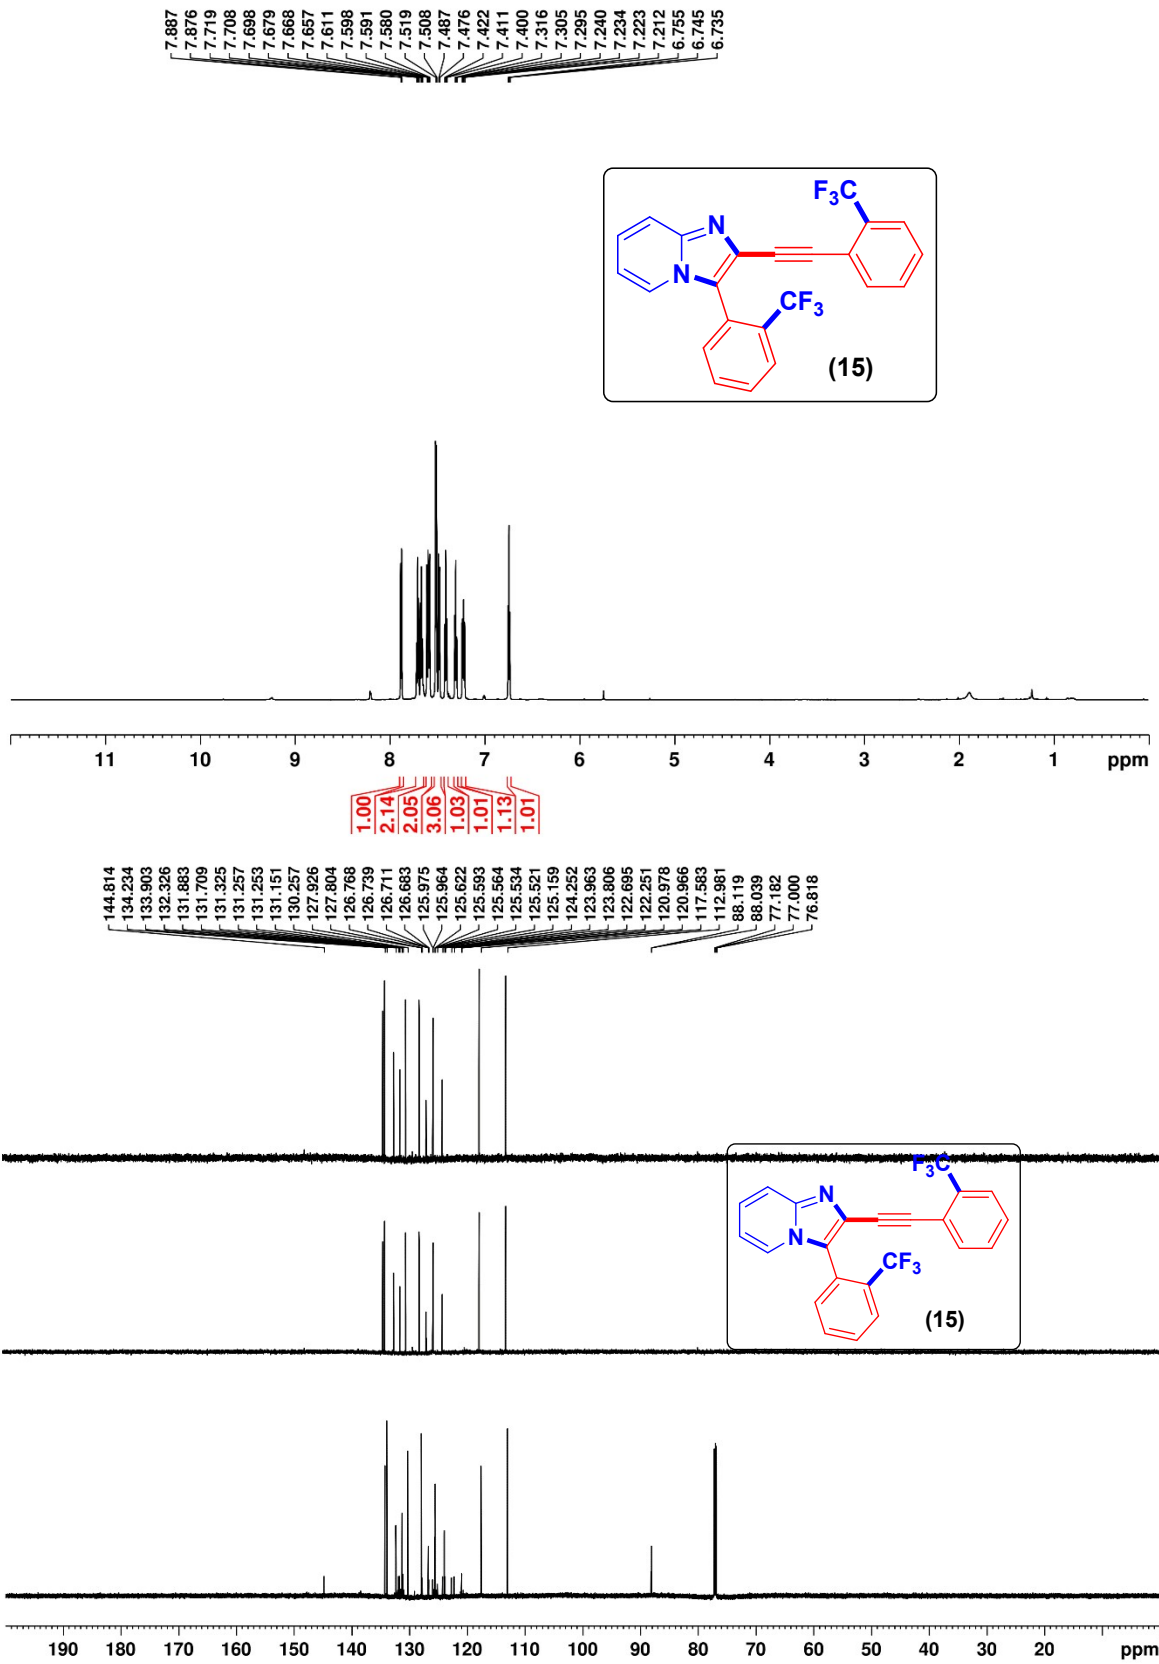

# $^{19}\text{F}$ -NMR

-104.730  
-104.749  
-105.306  
-105.325  
-106.118  
-106.135  
-106.991  
-107.009

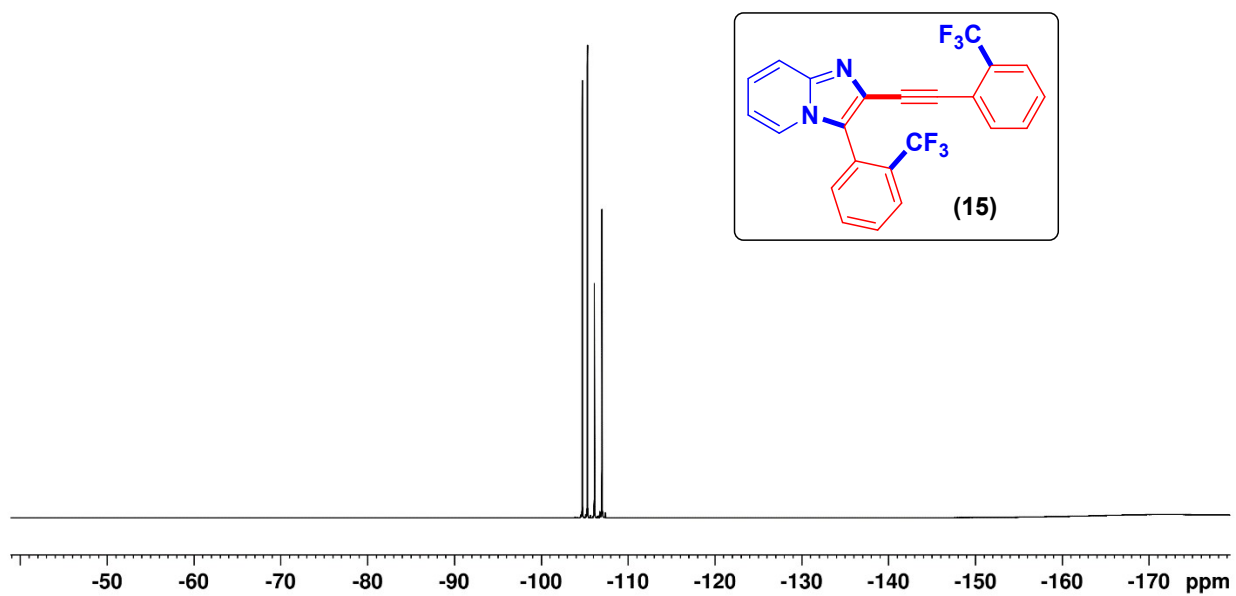

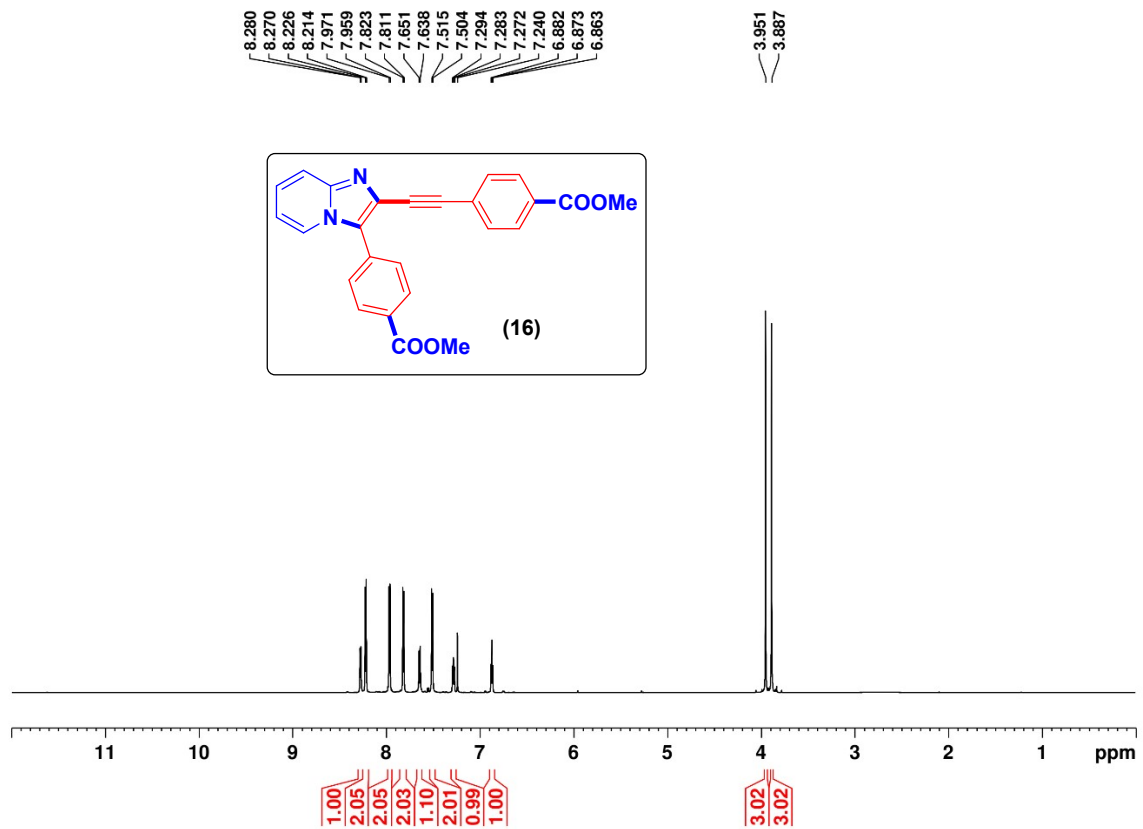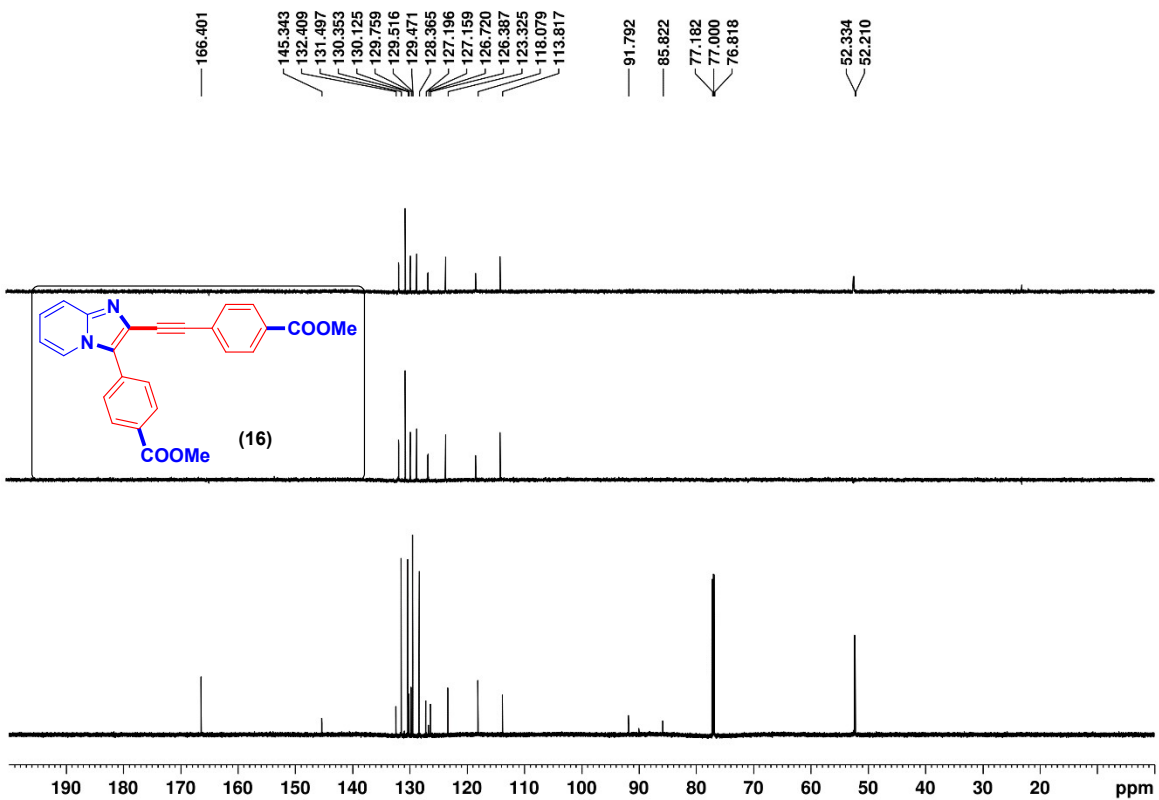

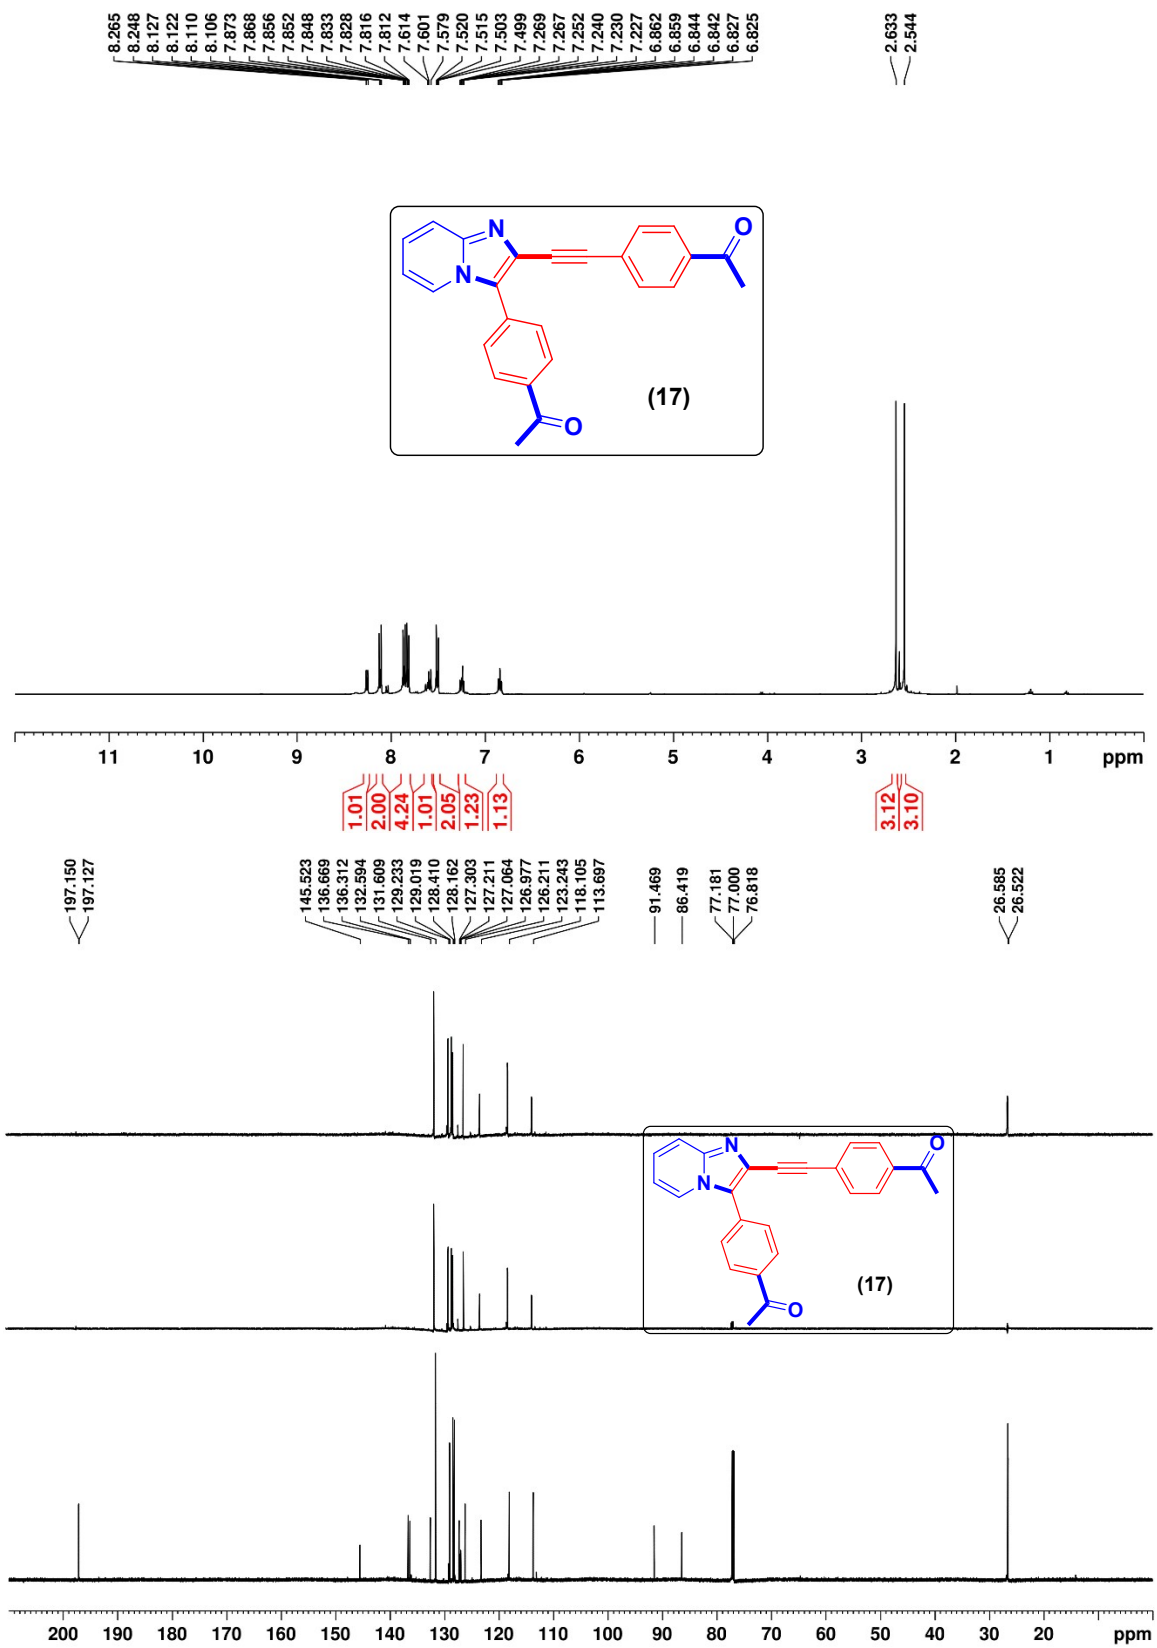



8.435  
8.432  
8.420  
8.417  
8.414  
7.620  
7.617  
7.599  
7.597  
7.595  
7.518  
7.516  
7.510  
7.507  
7.497  
7.494  
7.313  
7.310  
7.304  
7.301  
7.299  
7.297  
7.291  
7.286  
7.283  
7.276  
7.273  
7.259  
7.256  
7.254  
7.251  
7.240  
7.237  
7.234  
7.231  
7.228  
7.218  
7.002  
6.993  
6.989  
6.980  
6.899  
6.886  
6.879  
6.864  
6.862

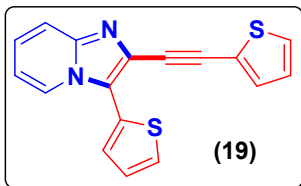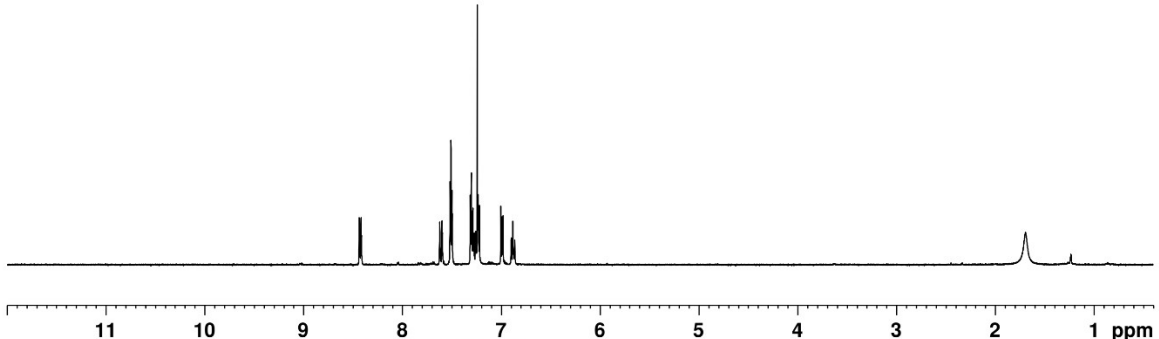

1.00  
1.04  
2.07  
2.06  
2.04  
1.00  
1.06

145.144  
132.529  
128.737  
127.827  
127.639  
127.112  
127.073  
126.582  
125.822  
123.771  
122.829  
122.005  
118.775  
117.897  
113.487  
86.959  
86.854  
77.182  
77.000  
76.819

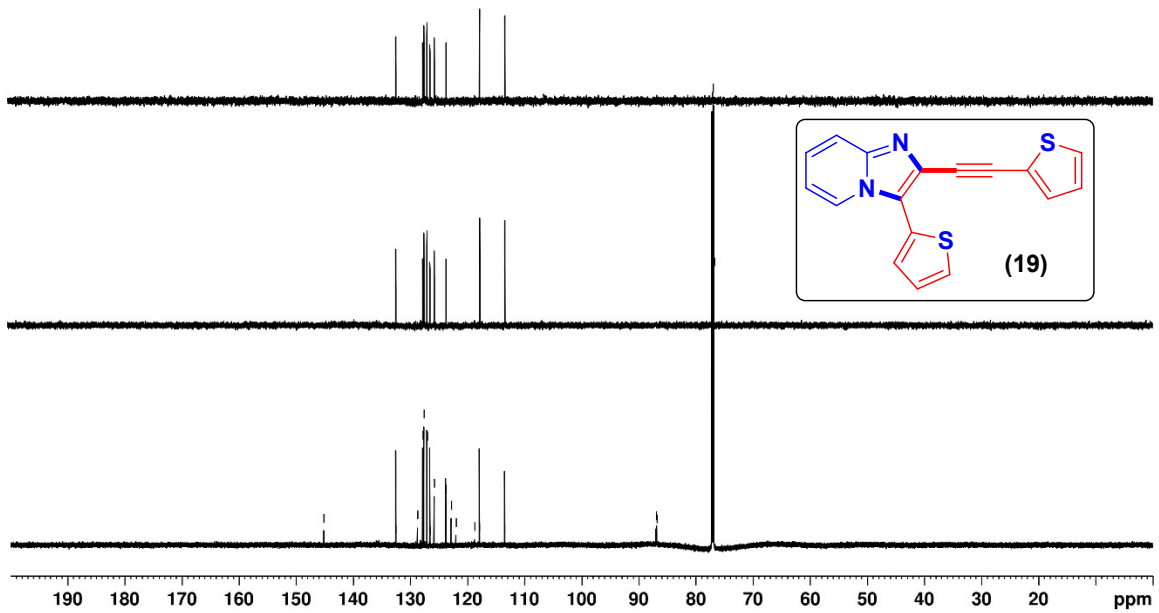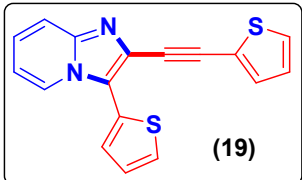

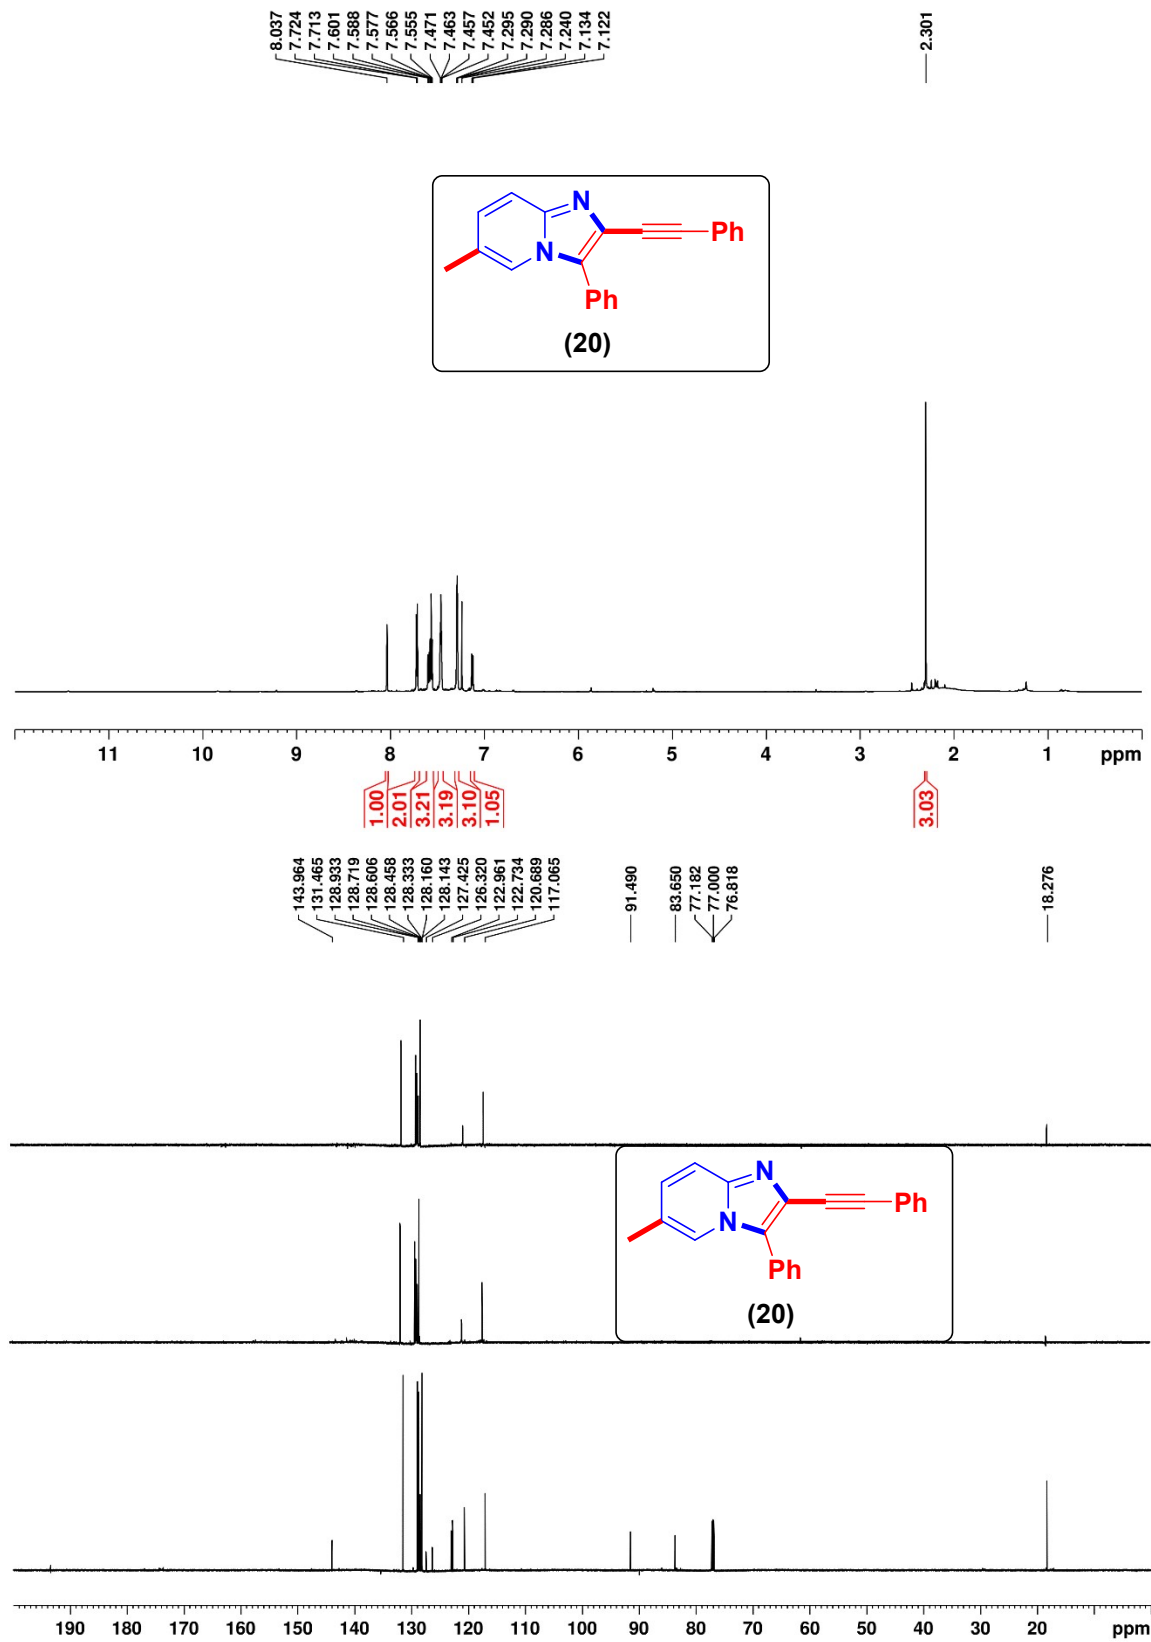

8.185  
8.167  
7.707  
7.703  
7.685  
7.656  
7.652  
7.584  
7.579  
7.565  
7.549  
7.546  
7.492  
7.489  
7.486  
7.477  
7.471  
7.465  
7.462  
7.453  
7.307  
7.301  
7.293  
7.240  
6.826  
6.821  
6.807  
6.802

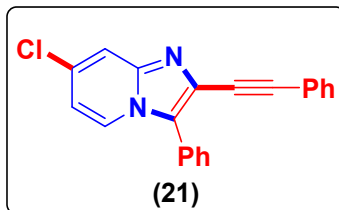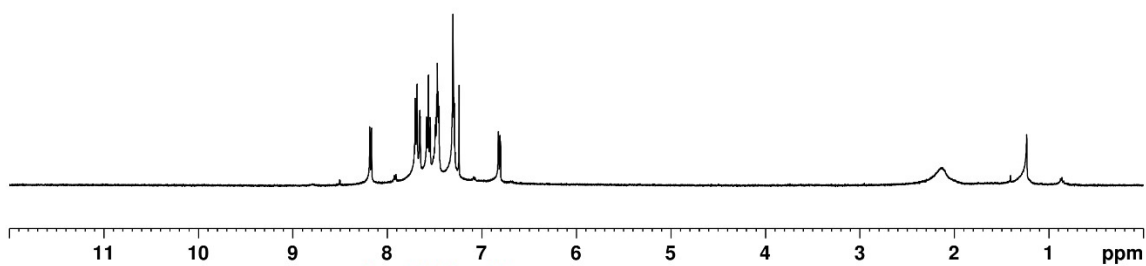

1.00  
3.03  
2.03  
3.10  
1.03

144.404  
132.571  
132.427  
131.684  
129.232  
129.106  
128.930  
128.777  
128.612  
128.023  
127.506  
127.232  
123.671  
122.588  
116.435  
114.960  
92.793  
82.593  
77.182  
77.000  
76.818

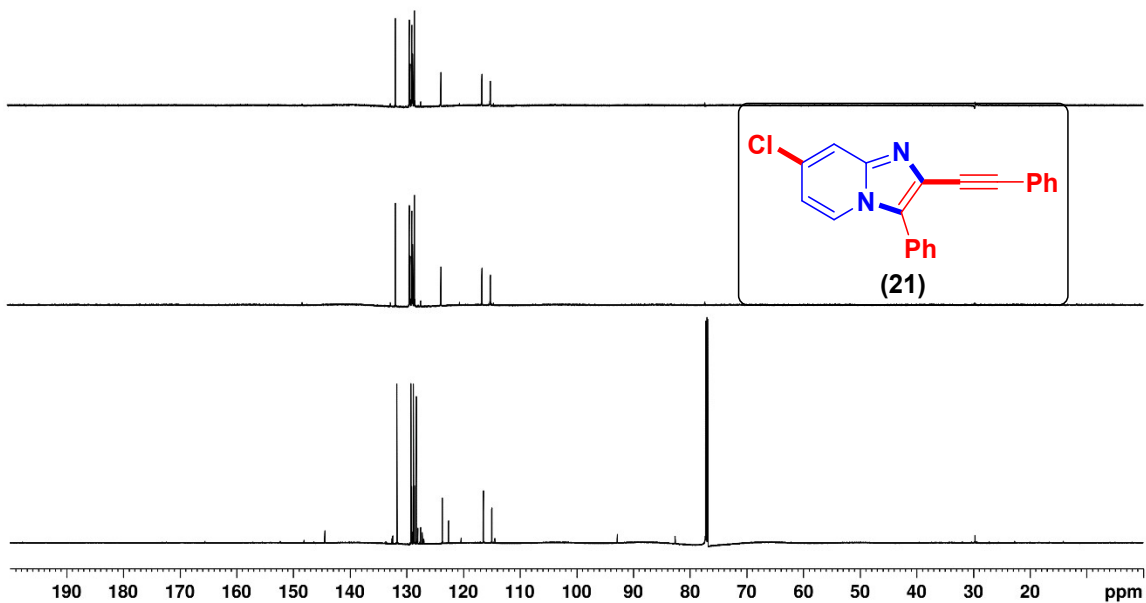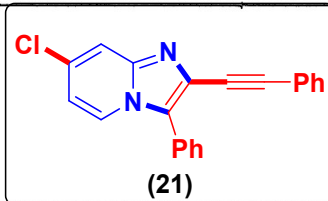

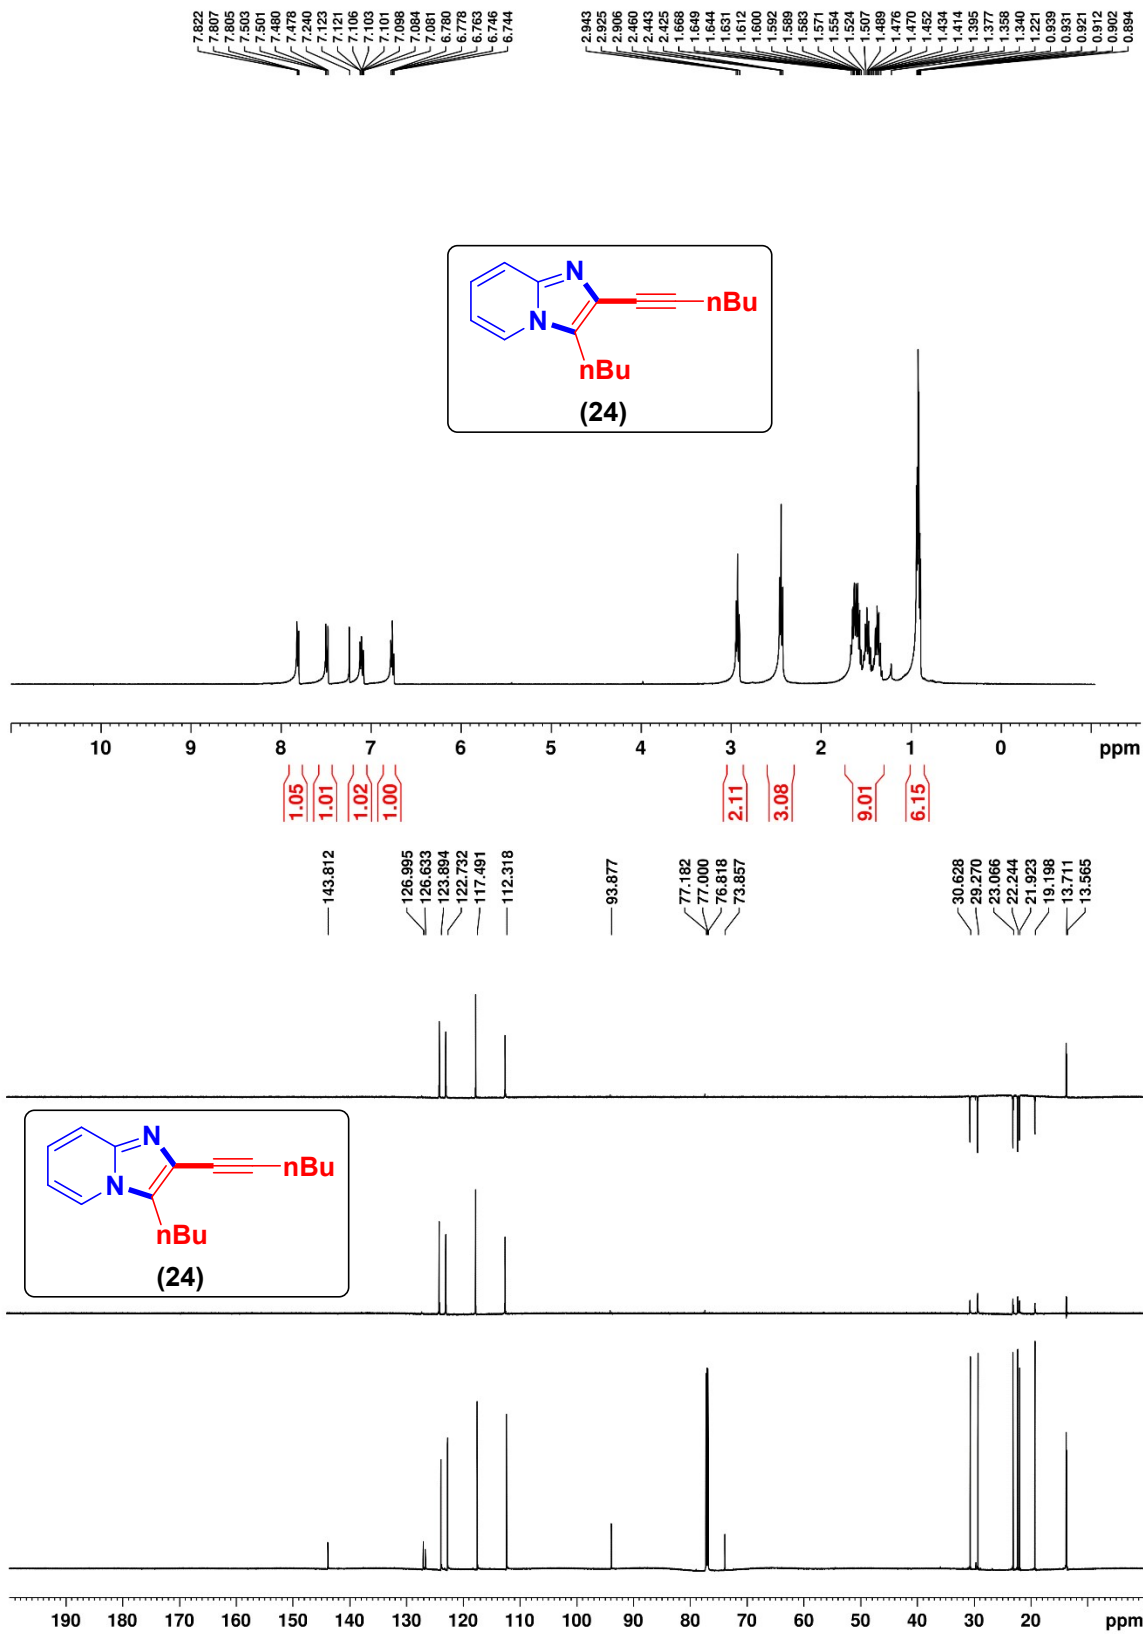

7.827  
7.810  
7.495  
7.473  
7.240  
7.125  
7.106  
7.085  
6.783  
6.766  
6.749

2.951  
2.933  
2.914  
2.463  
2.446  
2.428  
1.682  
1.663  
1.646  
1.639  
1.620  
1.601  
1.364  
1.355  
1.346  
1.337  
1.329  
1.319  
1.310  
0.913  
0.894  
0.876  
0.858

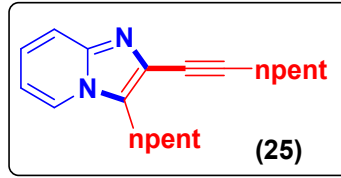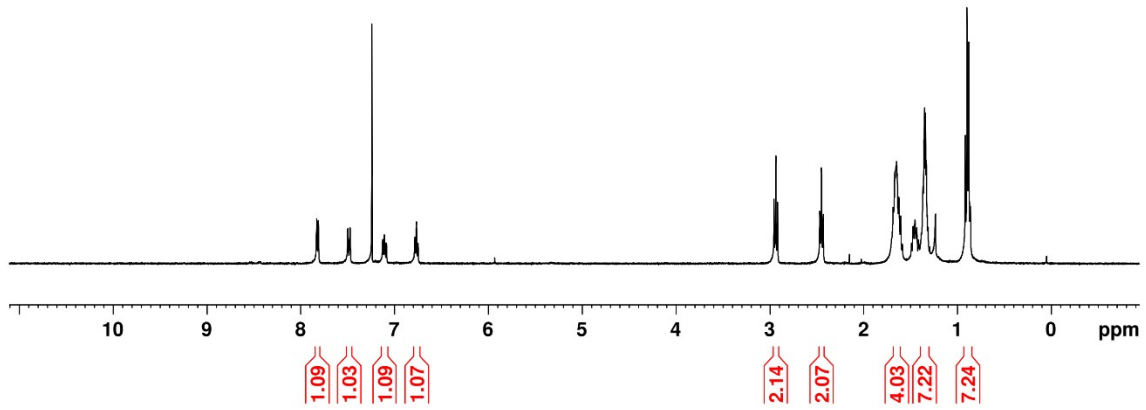

149.595  
148.131  
143.908  
138.544  
138.252  
127.060  
124.656  
123.897  
123.846  
122.741  
117.595  
112.307

93.899

77.182  
77.000  
76.818  
73.942  
71.627

31.306  
31.076  
28.325  
26.886  
23.341  
22.337  
22.240  
19.527  
13.973  
13.957

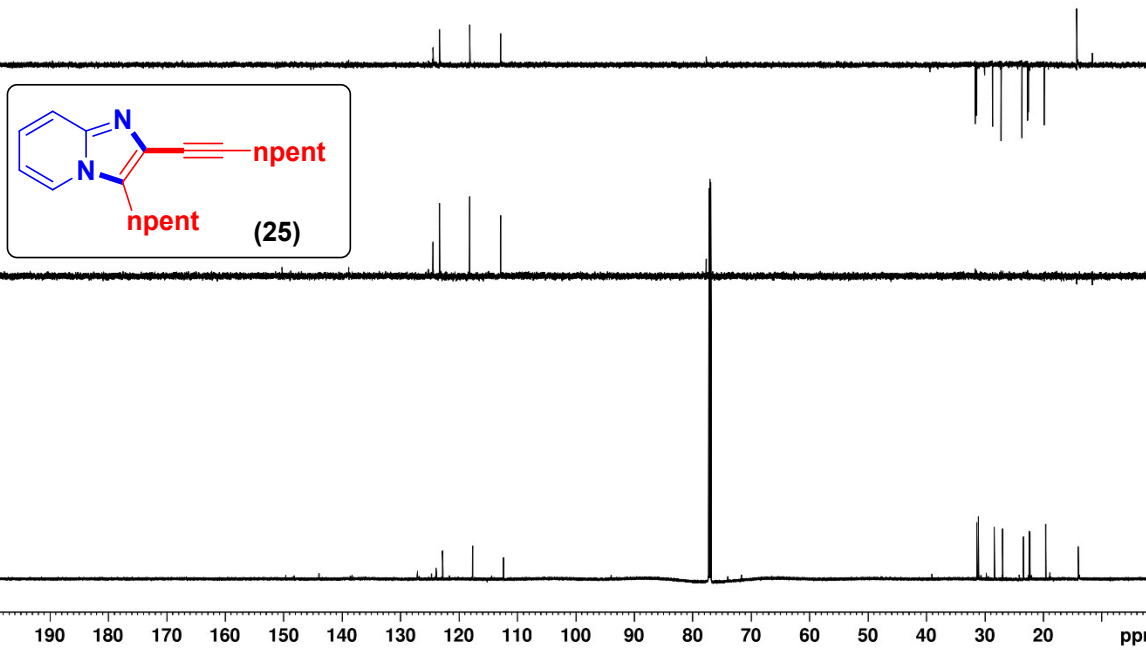



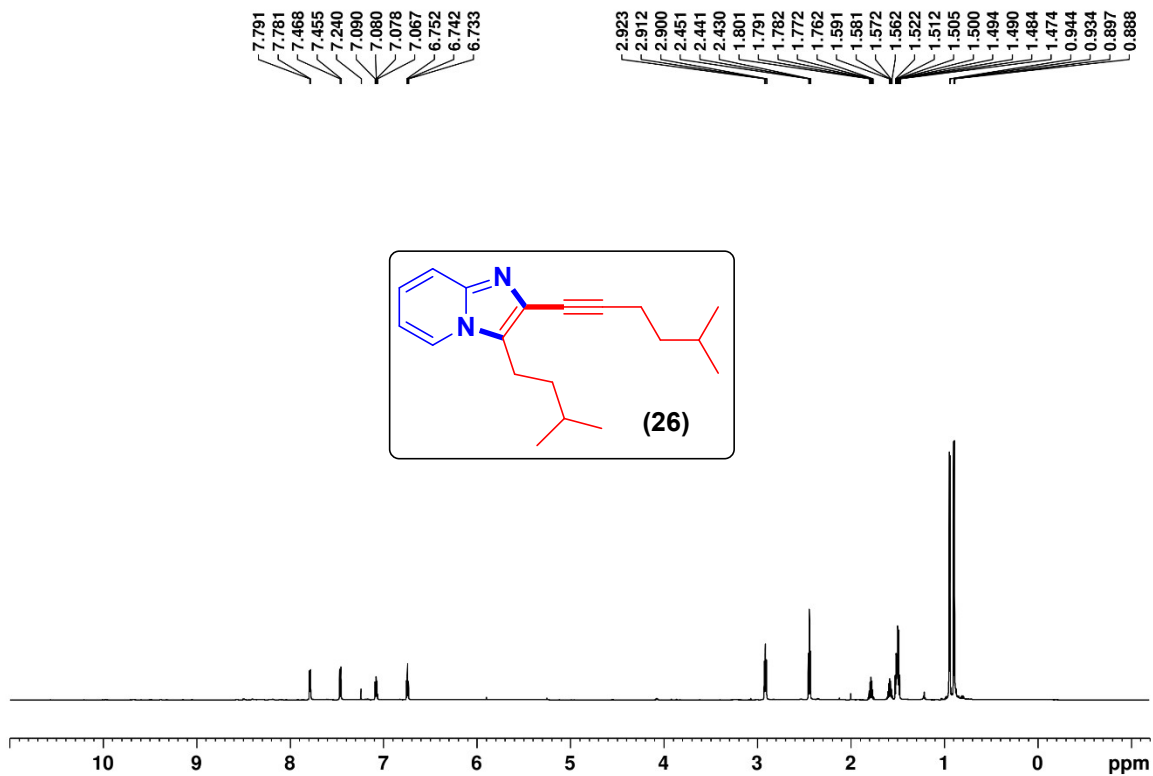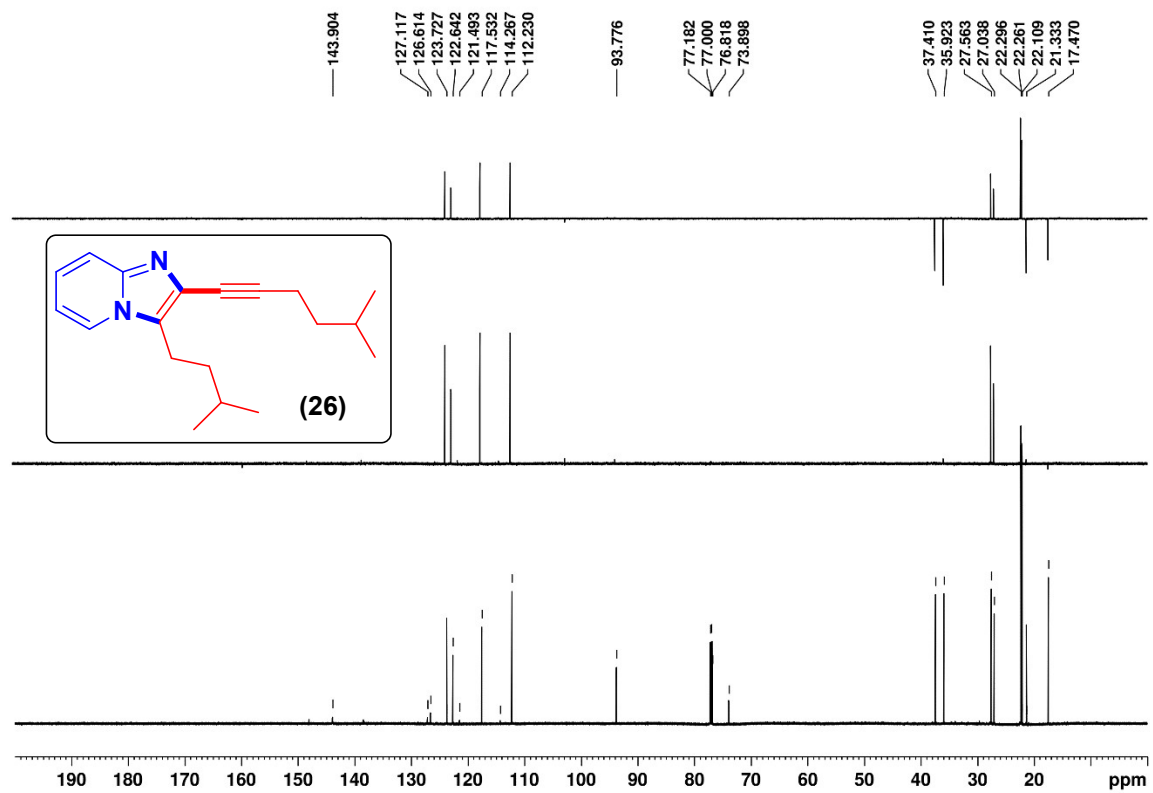

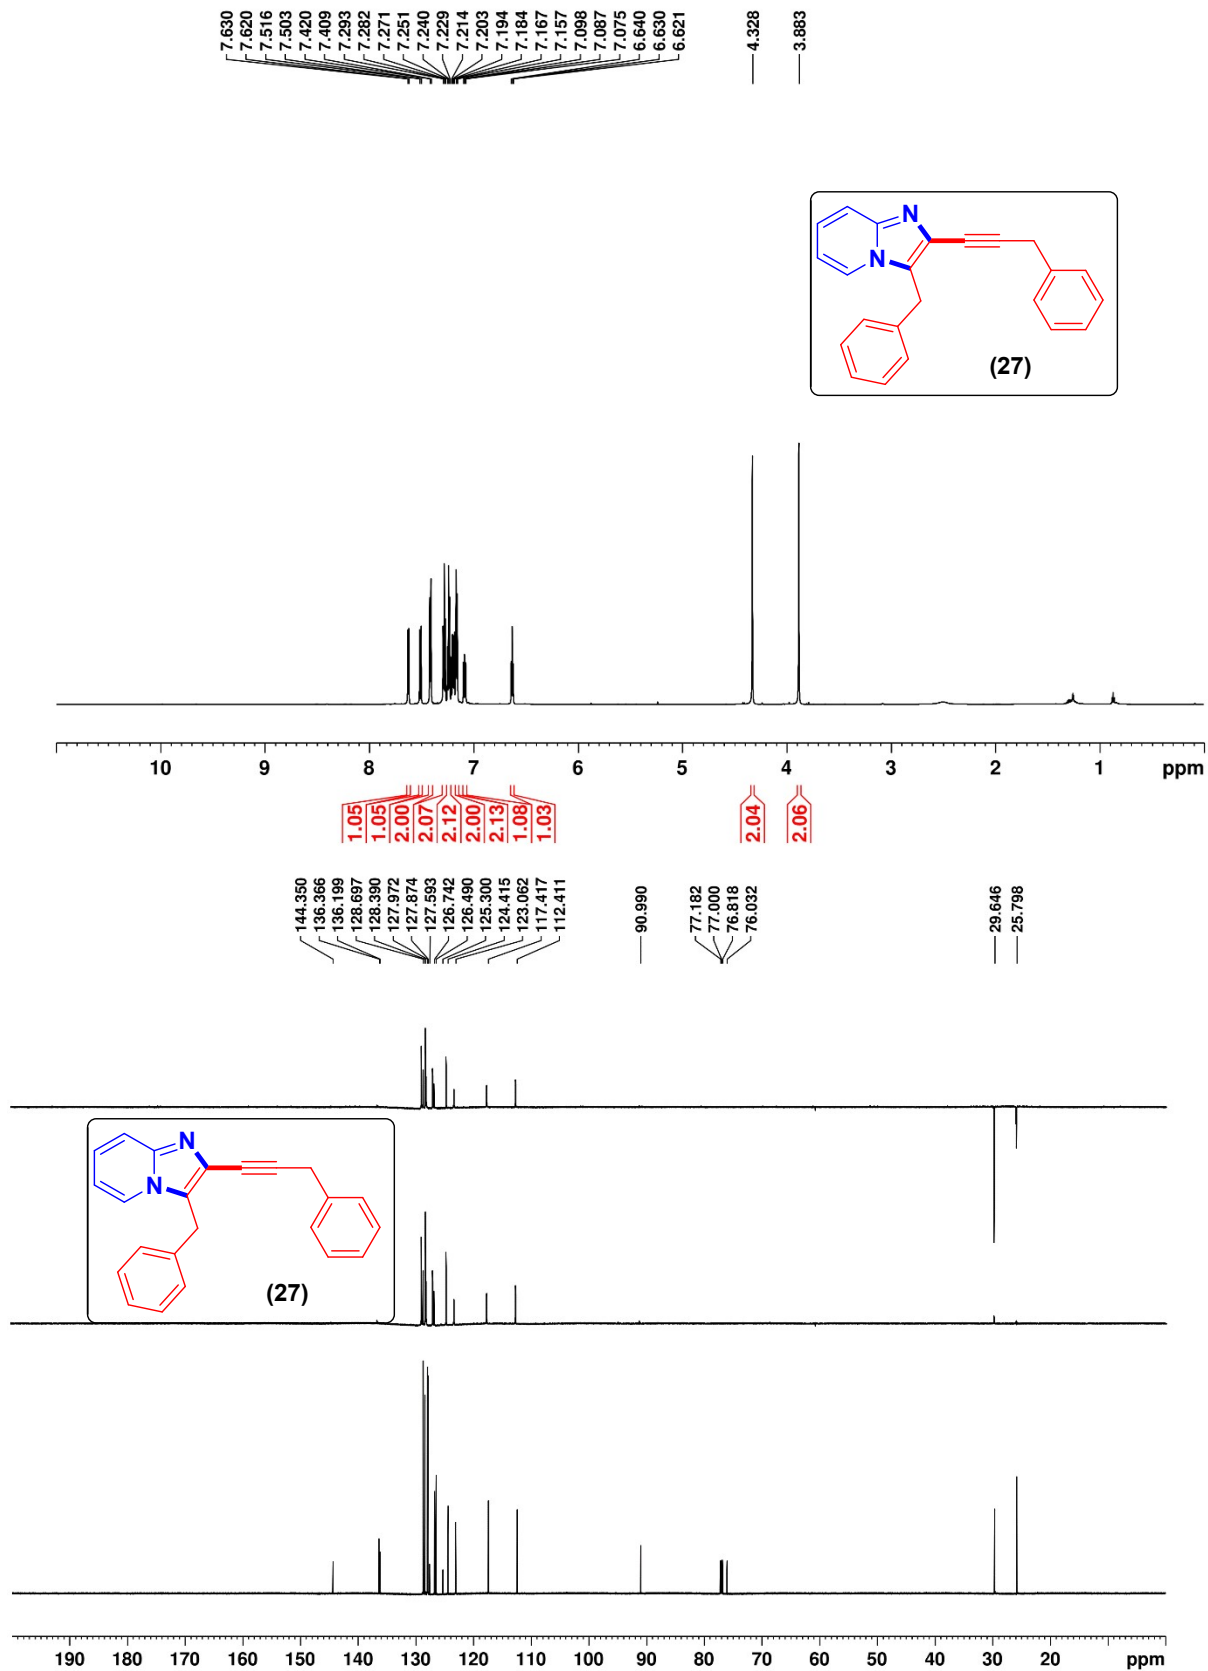



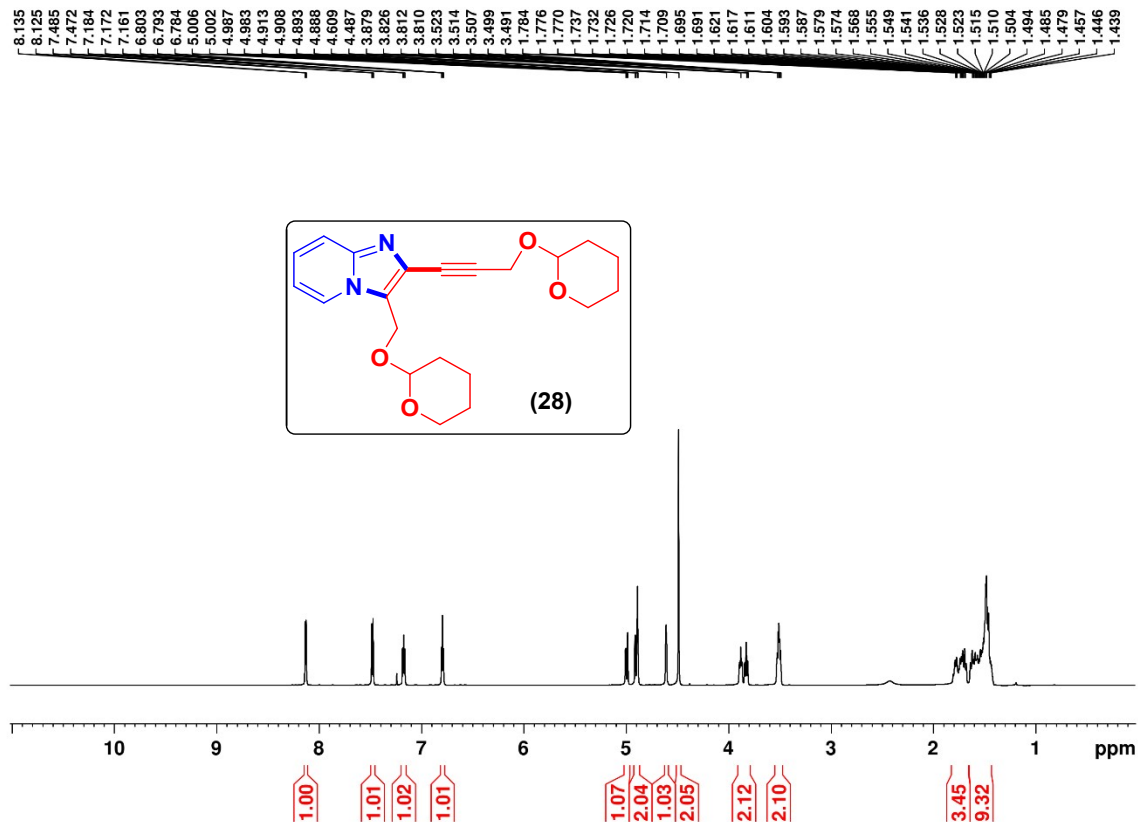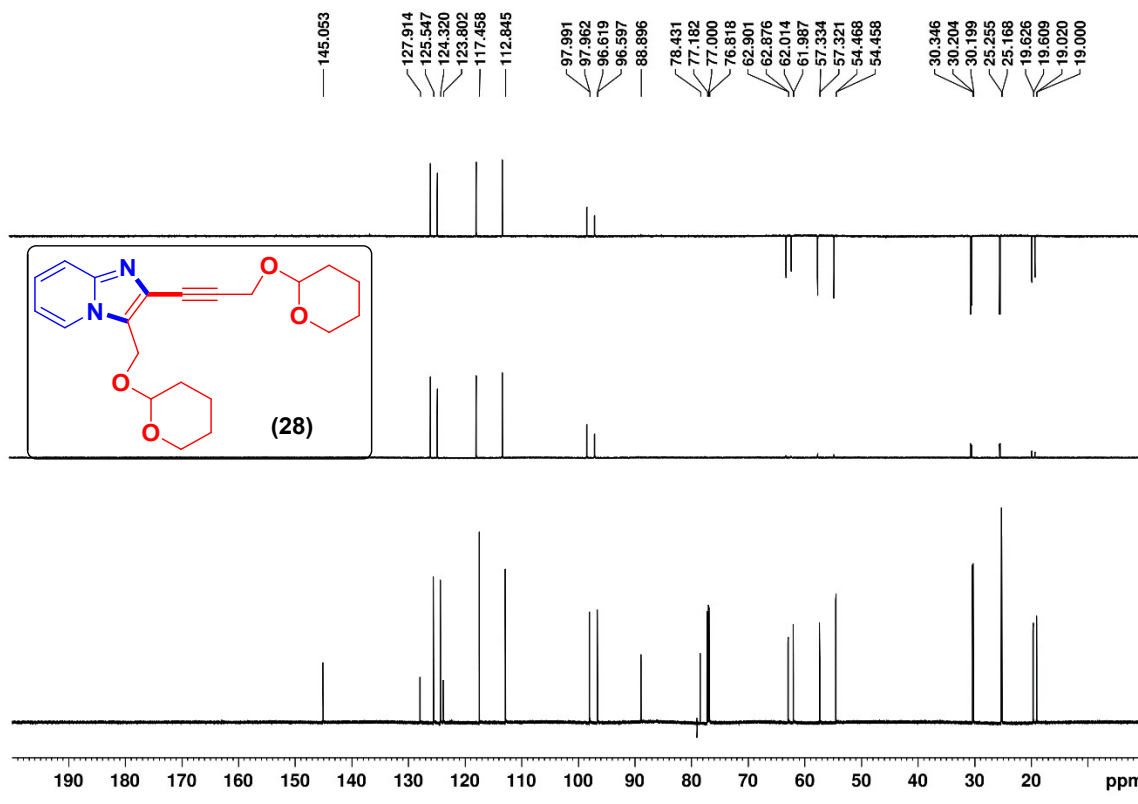

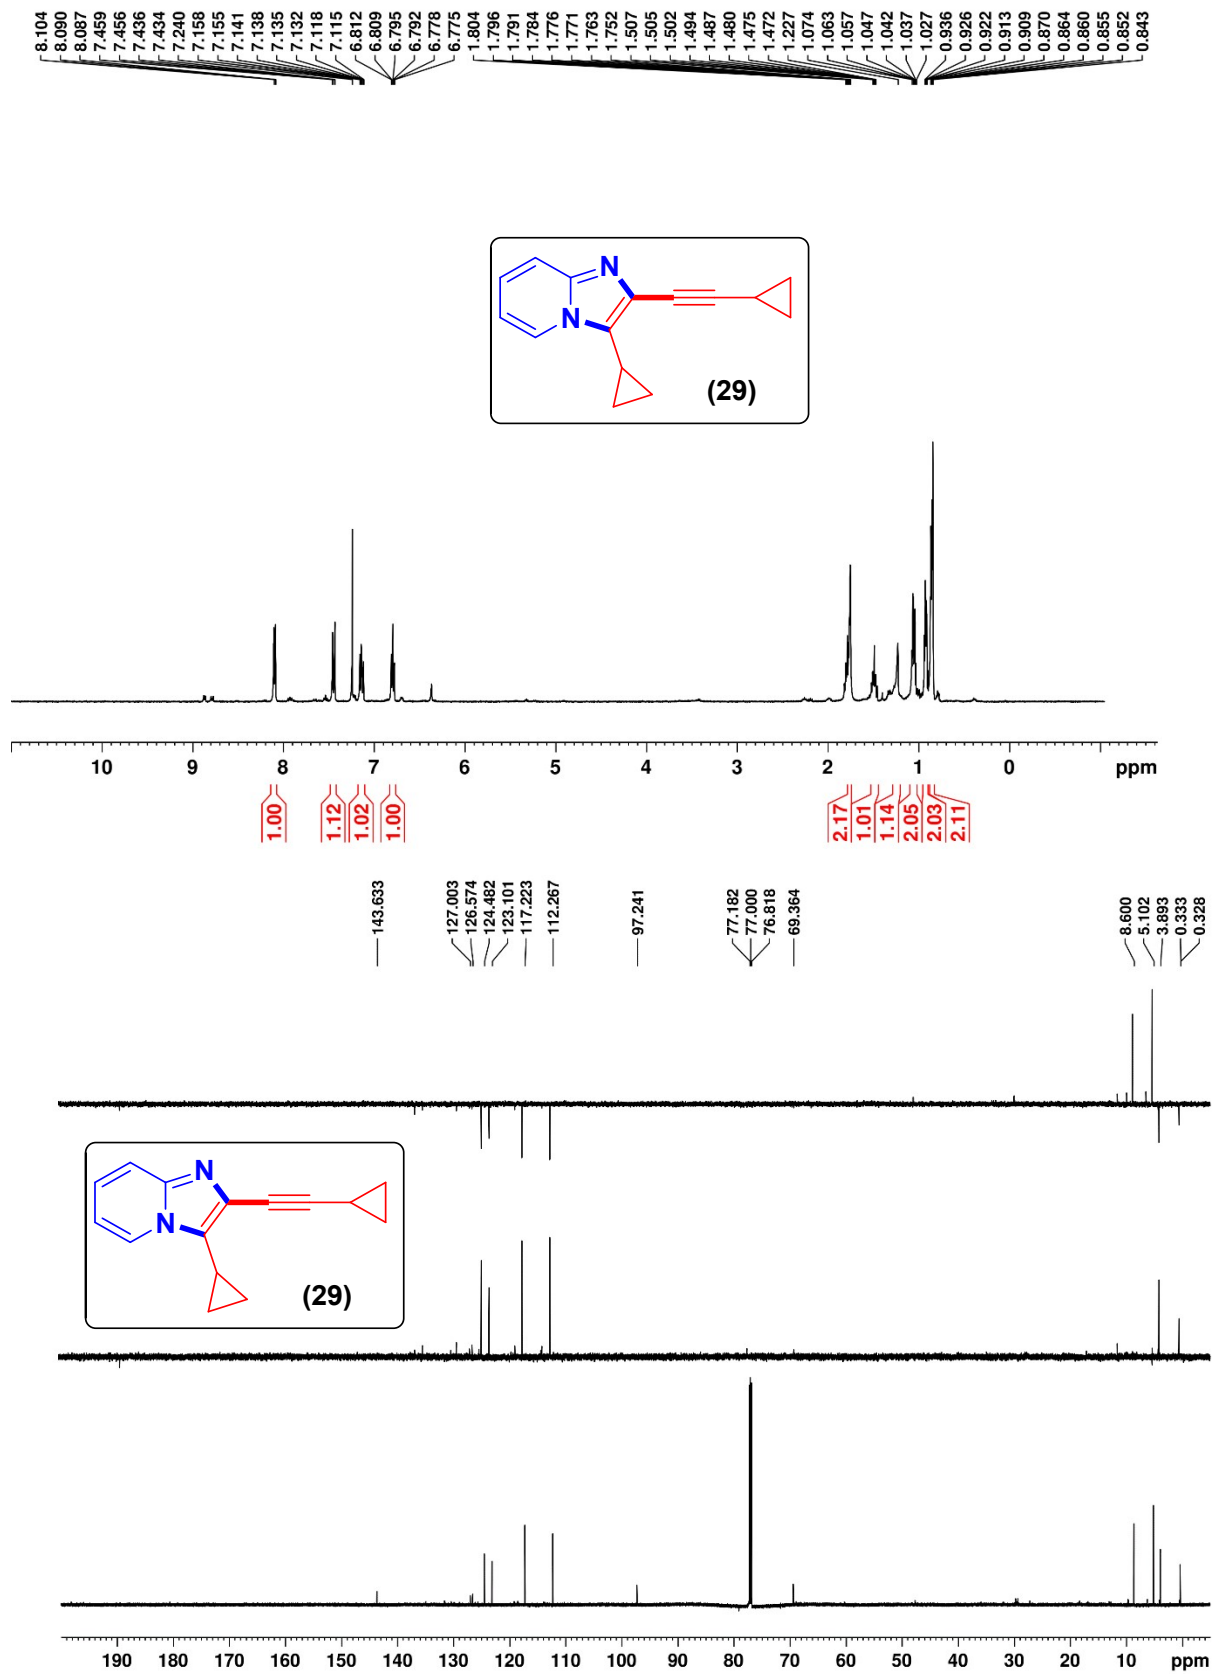

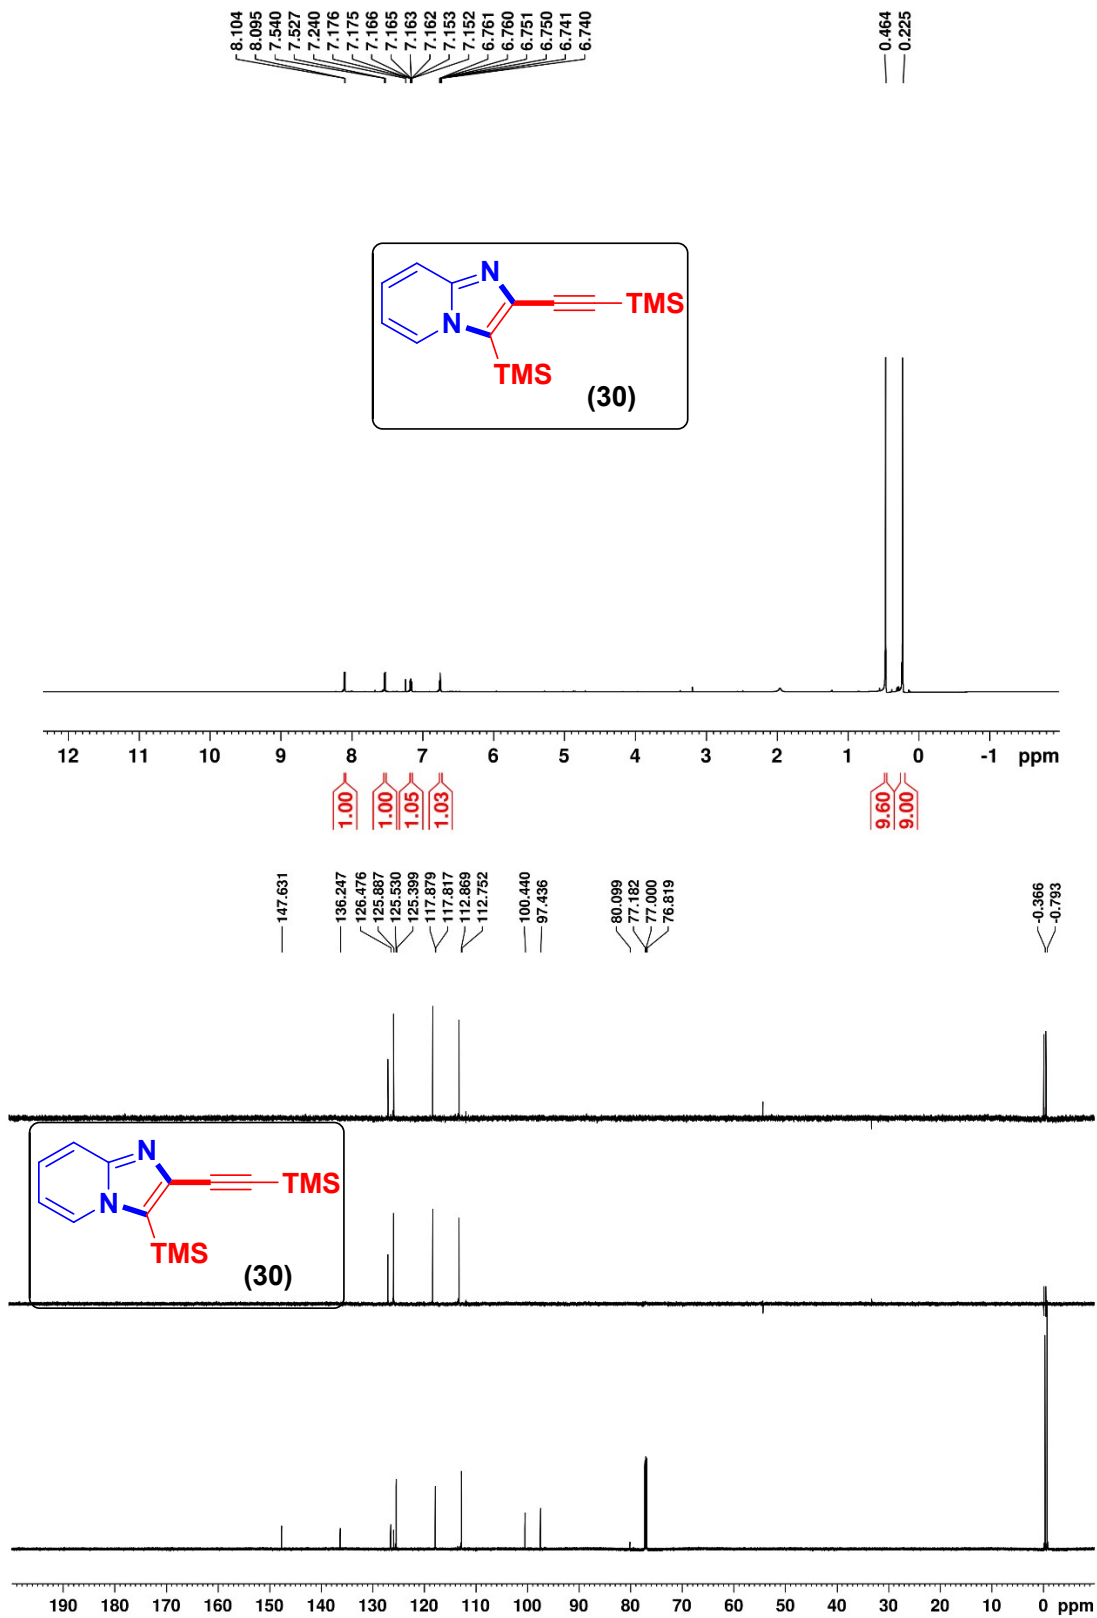

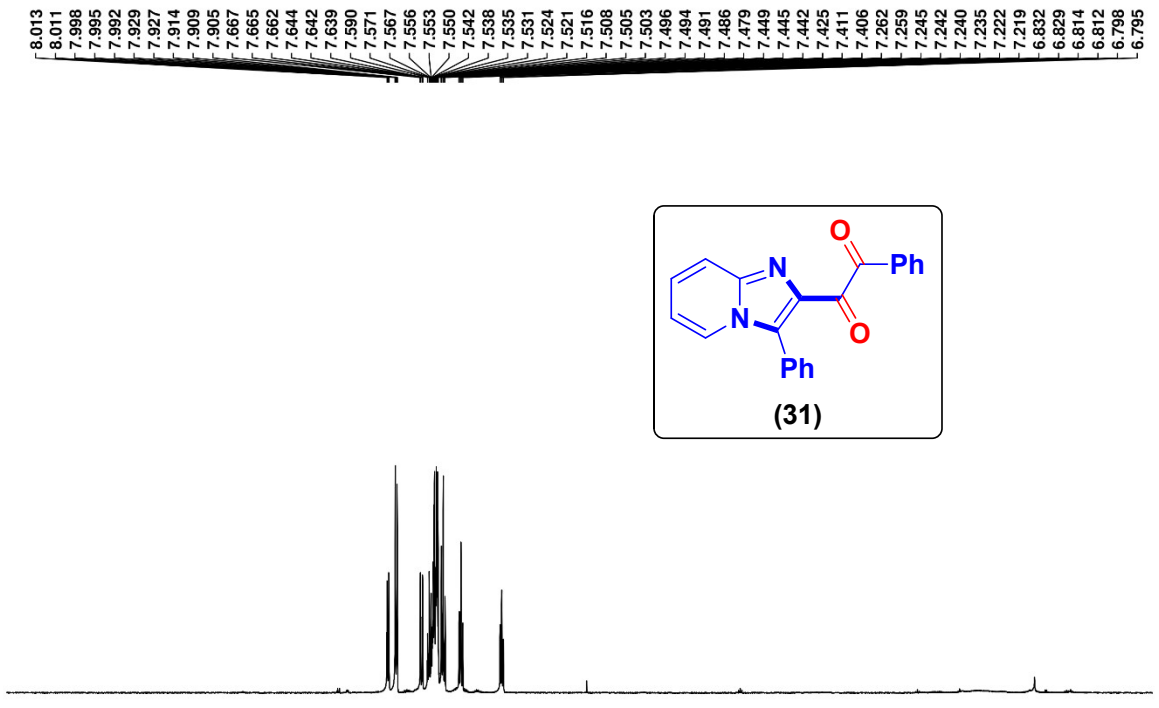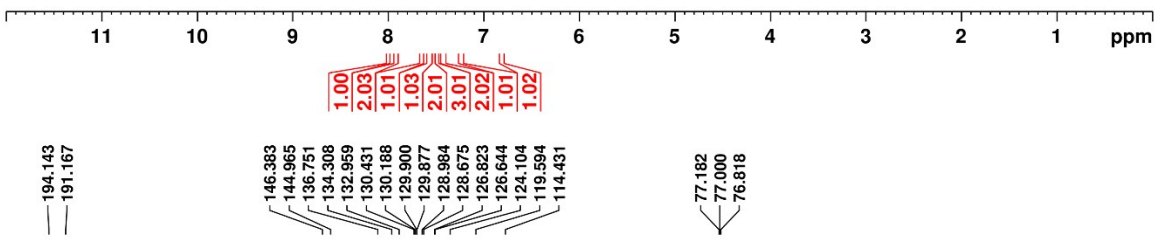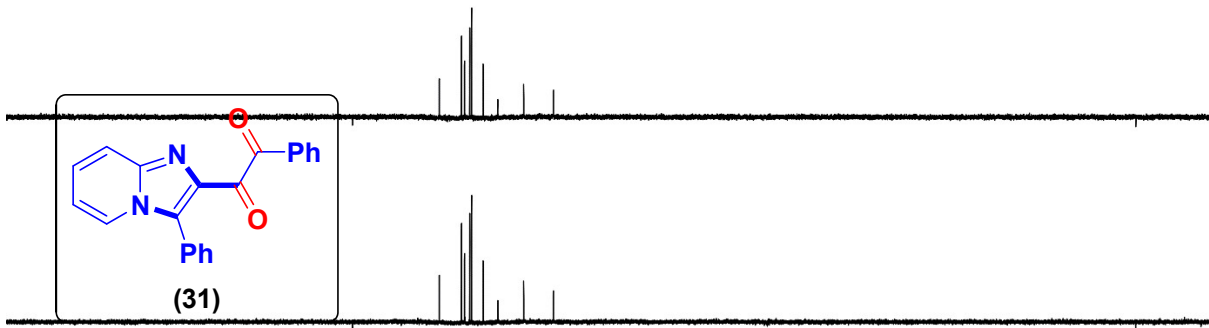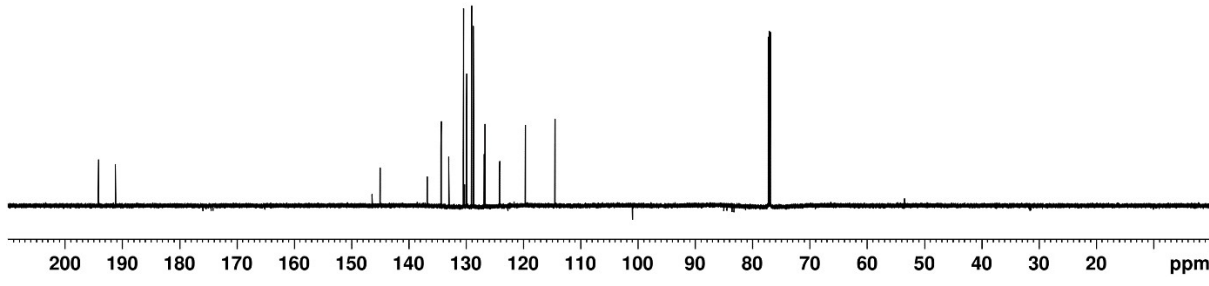

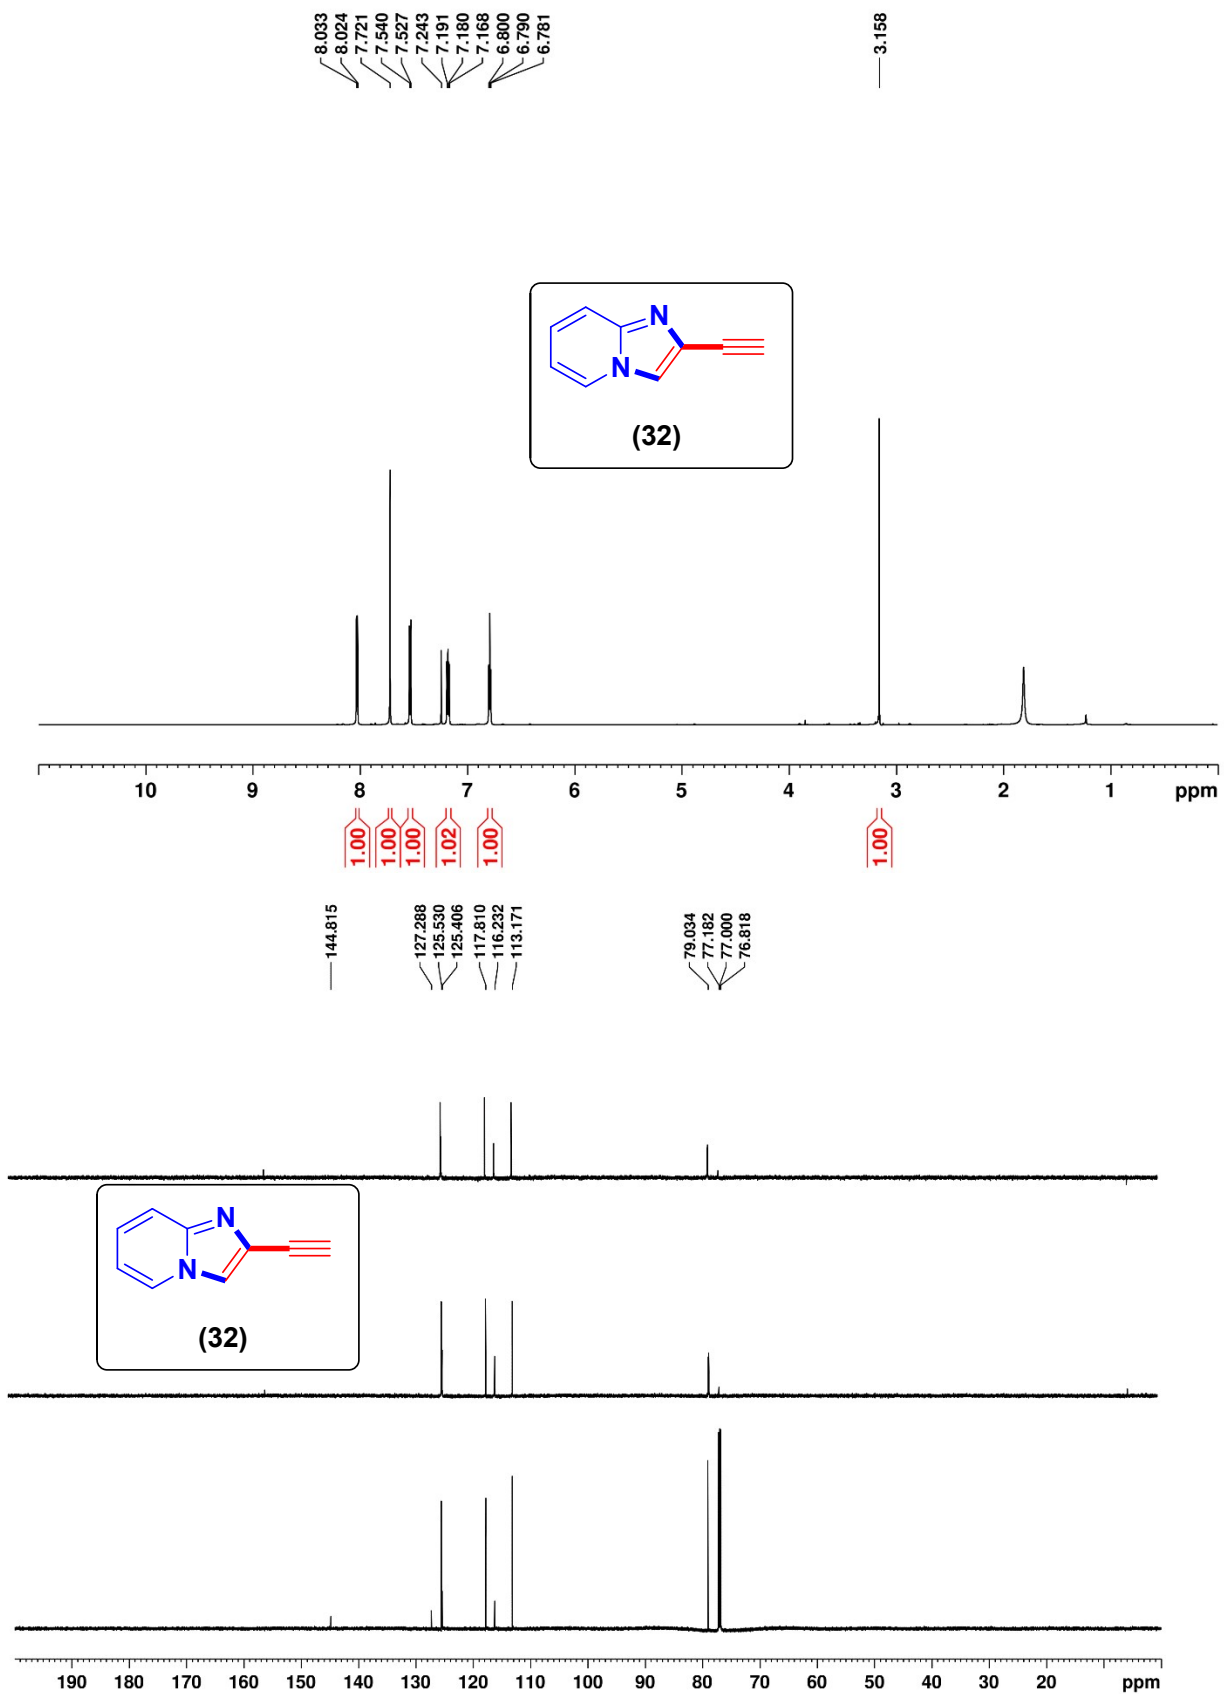

**Figure S4.** ORTEP diagram of compound **5** (CCDC No. 2303797)

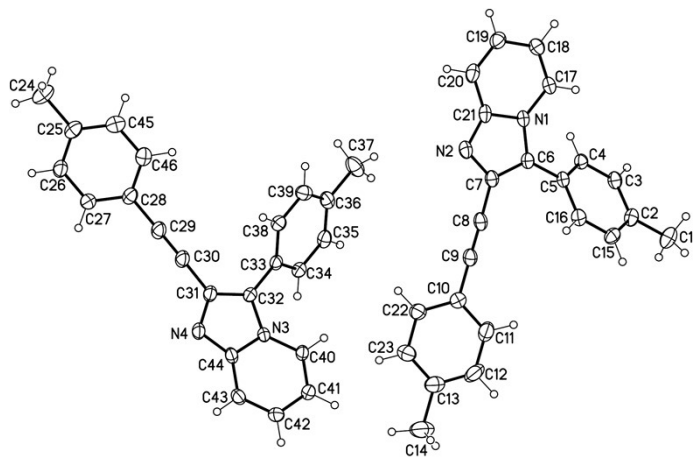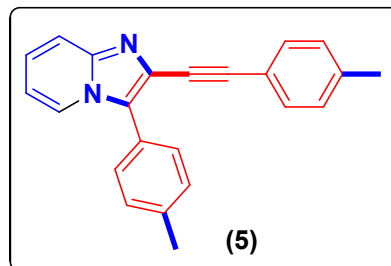

### 170449LT\_0m

**Table S1** Crystal data and structure refinement for 170449LT\_0m.

|                     |                                                |
|---------------------|------------------------------------------------|
| Identification code | 170449LT_0m                                    |
| Empirical formula   | C <sub>46</sub> H <sub>36</sub> N <sub>4</sub> |
| Formula weight      | 644.79                                         |
| Temperature/K       | 100.15                                         |
| Crystal system      | triclinic                                      |
| Space group         | P-1                                            |
| a/Å                 | 9.6958(4)                                      |
| b/Å                 | 12.8863(5)                                     |
| c/Å                 | 14.1978(5)                                     |
| α/°                 | 95.348(2)                                      |
| β/°                 | 91.322(2)                                      |
| γ/°                 | 97.198(2)                                      |

|                                             |                                                               |
|---------------------------------------------|---------------------------------------------------------------|
| Volume/Å <sup>3</sup>                       | 1751.19(12)                                                   |
| Z                                           | 2                                                             |
| ρ <sub>calc</sub> /g/cm <sup>3</sup>        | 1.223                                                         |
| μ/mm <sup>-1</sup>                          | 0.072                                                         |
| F(000)                                      | 680.0                                                         |
| Crystal size/mm <sup>3</sup>                | 0.15 × 0.14 × 0.04                                            |
| Radiation                                   | MoKα (λ = 0.71073)                                            |
| 2Θ range for data collection/°              | 4.096 to 52.808                                               |
| Index ranges                                | -12 ≤ h ≤ 12, -15 ≤ k ≤ 16, -13 ≤ l ≤ 17                      |
| Reflections collected                       | 21609                                                         |
| Independent reflections                     | 6900 [R <sub>int</sub> = 0.0274, R <sub>sigma</sub> = 0.0320] |
| Data/restraints/parameters                  | 6900/0/456                                                    |
| Goodness-of-fit on F <sup>2</sup>           | 1.026                                                         |
| Final R indexes [I ≥ 2σ (I)]                | R <sub>1</sub> = 0.0416, wR <sub>2</sub> = 0.0989             |
| Final R indexes [all data]                  | R <sub>1</sub> = 0.0538, wR <sub>2</sub> = 0.1069             |
| Largest diff. peak/hole / e Å <sup>-3</sup> | 0.22/-0.21                                                    |

**Table S2 Fractional Atomic Coordinates (×10<sup>4</sup>) and Equivalent Isotropic Displacement Parameters (Å<sup>2</sup>×10<sup>3</sup>) for 170449LT\_0m. U<sub>eq</sub> is defined as 1/3 of the trace of the orthogonalised U<sub>ij</sub> tensor.**

| Atom | x           | y          | z          | U(eq)   |
|------|-------------|------------|------------|---------|
| N1   | 11217.8(11) | 3863.2(8)  | 7154.8(8)  | 21.3(3) |
| N2   | 11069.1(12) | 5568.5(9)  | 7604.1(9)  | 26.3(3) |
| N3   | 1185.2(12)  | 8804.4(8)  | 6762.9(8)  | 20.8(3) |
| N4   | 1687.0(13)  | 10518.6(9) | 6551.6(9)  | 27.3(3) |
| C1   | 6999.0(17)  | 203.7(13)  | 9119.8(12) | 37.4(4) |
| C2   | 7807.1(14)  | 1157.4(11) | 8762.0(11) | 26.0(3) |

**Table S2 Fractional Atomic Coordinates ( $\times 10^4$ ) and Equivalent Isotropic Displacement Parameters ( $\text{\AA}^2 \times 10^3$ ) for 170449LT\_0m.  $U_{\text{eq}}$  is defined as 1/3 of the trace of the orthogonalised  $U_{ij}$  tensor.**

| Atom | <i>x</i>    | <i>y</i>    | <i>z</i>    | $U(\text{eq})$ |
|------|-------------|-------------|-------------|----------------|
| C3   | 8080.7(14)  | 1196.8(11)  | 7806.3(10)  | 24.4(3)        |
| C4   | 8838.2(14)  | 2069.7(10)  | 7482.8(10)  | 21.7(3)        |
| C5   | 9361.3(14)  | 2934.0(10)  | 8114.7(10)  | 20.6(3)        |
| C6   | 10180.3(14) | 3871.4(10)  | 7810.5(10)  | 21.3(3)        |
| C7   | 10126.6(14) | 4929.9(10)  | 8071.3(10)  | 23.1(3)        |
| C8   | 9201.3(15)  | 5368.5(10)  | 8717.4(10)  | 25.2(3)        |
| C9   | 8432.4(15)  | 5762.6(10)  | 9255.2(10)  | 25.6(3)        |
| C10  | 7578.1(14)  | 6248.3(11)  | 9933.7(10)  | 25.0(3)        |
| C11  | 6815.0(18)  | 5664.9(13)  | 10561.0(12) | 39.3(4)        |
| C12  | 6033.8(19)  | 6153.6(15)  | 11233.5(13) | 46.4(5)        |
| C13  | 5989.2(16)  | 7227.3(14)  | 11302.6(11) | 35.3(4)        |
| C14  | 5162(2)     | 7764.6(18)  | 12049.0(13) | 54.9(6)        |
| C15  | 8289.5(15)  | 2033.4(11)  | 9382.2(10)  | 26.8(3)        |
| C16  | 9057.9(14)  | 2908.7(11)  | 9070.2(10)  | 24.7(3)        |
| C17  | 11756.2(14) | 3039.5(11)  | 6661.4(10)  | 23.8(3)        |
| C18  | 12757.9(15) | 3252.4(11)  | 6039.1(11)  | 27.3(3)        |
| C19  | 13277.5(15) | 4309.1(12)  | 5900.3(11)  | 30.6(3)        |
| C20  | 12777.3(15) | 5123.5(11)  | 6404.4(11)  | 29.1(3)        |
| C21  | 11722.6(14) | 4912.7(10)  | 7052.3(10)  | 24.5(3)        |
| C22  | 7526.5(16)  | 7331.2(12)  | 9996.9(11)  | 30.8(3)        |
| C23  | 6741.4(16)  | 7804.4(13)  | 10671.9(11) | 34.2(4)        |
| C24  | 5758.1(18)  | 12902.2(14) | 1308.5(12)  | 40.9(4)        |
| C25  | 5044.2(16)  | 12334.5(12) | 2081.1(11)  | 29.4(3)        |



**Table S2 Fractional Atomic Coordinates ( $\times 10^4$ ) and Equivalent Isotropic Displacement Parameters ( $\text{\AA}^2 \times 10^3$ ) for 170449LT\_0m.  $U_{\text{eq}}$  is defined as 1/3 of the trace of the orthogonalised  $U_{ij}$  tensor.**

| Atom | $x$        | $y$         | $z$        | $U(\text{eq})$ |
|------|------------|-------------|------------|----------------|
| C26  | 3878.6(17) | 12671.9(11) | 2499.0(11) | 32.5(4)        |
| C27  | 3233.9(17) | 12161.2(11) | 3220.5(11) | 31.8(4)        |
| C28  | 3747.0(15) | 11290.3(11) | 3543.1(10) | 25.7(3)        |
| C29  | 3101.4(16) | 10777.1(11) | 4308.3(10) | 28.5(3)        |
| C30  | 2578.6(16) | 10361.5(11) | 4955.6(11) | 28.1(3)        |
| C31  | 1994.0(15) | 9899.2(11)  | 5759.5(10) | 25.3(3)        |
| C32  | 1697.8(14) | 8837.0(10)  | 5861.5(10) | 21.5(3)        |
| C33  | 1917.0(14) | 7896.4(10)  | 5243.9(9)  | 21.2(3)        |
| C34  | 888.2(14)  | 7033.2(11)  | 5074.8(10) | 23.5(3)        |
| C35  | 1141.8(15) | 6144.2(11)  | 4506.9(10) | 26.0(3)        |
| C36  | 2412.8(16) | 6090.0(11)  | 4085.0(10) | 27.1(3)        |
| C37  | 2692.9(18) | 5123.6(13)  | 3471.6(12) | 38.7(4)        |
| C38  | 3186.7(14) | 7848.8(11)  | 4810.4(10) | 24.1(3)        |
| C39  | 3422.5(15) | 6959.4(12)  | 4242.2(10) | 27.6(3)        |
| C40  | 814.6(14)  | 7963.0(10)  | 7278.9(10) | 22.3(3)        |
| C41  | 419.8(14)  | 8148.9(11)  | 8178.8(10) | 24.5(3)        |
| C42  | 397.3(15)  | 9191.0(11)  | 8594.8(10) | 27.1(3)        |
| C43  | 791.4(15)  | 10026.2(11) | 8096.8(10) | 26.8(3)        |
| C44  | 1207.9(14) | 9842.8(10)  | 7155.4(10) | 23.5(3)        |
| C45  | 5539.5(15) | 11454.5(12) | 2398.5(11) | 31.0(3)        |
| C46  | 4906.7(15) | 10935.9(12) | 3114.6(11) | 29.1(3)        |

**Table S3 Anisotropic Displacement Parameters ( $\text{\AA}^2 \times 10^3$ ) for 170449LT\_0m. The Anisotropic displacement factor exponent takes the form:  $-2\pi^2[h^2a^{*2}U_{11}+2hka^*b^*U_{12}+\dots]$ .**

| Atom | $U_{11}$ | $U_{22}$ | $U_{33}$ | $U_{23}$ | $U_{13}$ | $U_{12}$ |
|------|----------|----------|----------|----------|----------|----------|
| N1   | 22.2(6)  | 15.6(5)  | 26.2(6)  | 3.6(5)   | -2.5(5)  | 2.7(4)   |
| N2   | 27.8(6)  | 17.2(6)  | 34.0(7)  | 3.4(5)   | -0.9(5)  | 2.4(5)   |
| N3   | 24.8(6)  | 16.7(5)  | 21.5(6)  | 2.9(5)   | 1.7(5)   | 4.7(4)   |
| N4   | 38.4(7)  | 18.5(6)  | 26.0(7)  | 4.8(5)   | 2.4(5)   | 5.4(5)   |
| C1   | 38.1(9)  | 34.3(9)  | 39.1(10) | 14.0(7)  | -1.4(7)  | -5.8(7)  |
| C2   | 23.6(7)  | 24.7(7)  | 30.1(8)  | 8.4(6)   | -2.8(6)  | 1.2(6)   |
| C3   | 25.1(7)  | 18.7(7)  | 28.3(8)  | 0.6(6)   | -4.8(6)  | 0.8(5)   |
| C4   | 23.5(7)  | 20.4(7)  | 21.5(7)  | 2.8(6)   | -1.3(6)  | 4.1(5)   |
| C5   | 21.2(7)  | 17.3(6)  | 23.8(7)  | 3.0(5)   | -2.9(5)  | 3.8(5)   |
| C6   | 21.8(7)  | 18.9(7)  | 23.2(7)  | 3.4(6)   | -2.8(6)  | 2.8(5)   |
| C7   | 25.1(7)  | 18.1(7)  | 25.6(8)  | 1.1(6)   | -3.6(6)  | 1.7(5)   |
| C8   | 29.4(8)  | 16.1(7)  | 29.1(8)  | 0.7(6)   | -5.0(6)  | 0.8(6)   |
| C9   | 29.3(8)  | 18.1(7)  | 28.1(8)  | 1.6(6)   | -2.9(6)  | -0.3(6)  |
| C10  | 23.5(7)  | 27.3(7)  | 23.7(8)  | 2.1(6)   | -1.9(6)  | 1.5(6)   |
| C11  | 41.5(9)  | 34.8(9)  | 45.0(10) | 18.4(8)  | 7.4(8)   | 6.8(7)   |
| C12  | 41.7(10) | 63.1(12) | 41.5(10) | 29.9(9)  | 16.5(8)  | 12.4(9)  |
| C13  | 28.1(8)  | 56.7(11) | 24.5(8)  | 8.6(8)   | -0.3(6)  | 15.6(7)  |
| C14  | 50.1(11) | 91.9(16) | 32.7(10) | 17.6(10) | 11.6(8)  | 38.3(11) |
| C15  | 27.8(8)  | 31.5(8)  | 21.7(7)  | 7.0(6)   | -1.1(6)  | 3.2(6)   |
| C16  | 27.8(7)  | 22.1(7)  | 23.6(8)  | 0.1(6)   | -5.0(6)  | 2.8(6)   |
| C17  | 23.8(7)  | 18.4(7)  | 29.4(8)  | 2.4(6)   | -3.1(6)  | 4.6(5)   |
| C18  | 25.3(7)  | 26.5(7)  | 30.9(8)  | 2.2(6)   | -0.6(6)  | 6.7(6)   |
| C19  | 25.6(8)  | 33.9(8)  | 34.5(9)  | 11.7(7)  | 4.0(6)   | 5.0(6)   |

**Table S3 Anisotropic Displacement Parameters ( $\text{\AA}^2 \times 10^3$ ) for 170449LT\_0m. The Anisotropic displacement factor exponent takes the form:  $-2\pi^2[h^2a^{*2}U_{11}+2hka^*b^*U_{12}+\dots]$ .**

| Atom | $U_{11}$ | $U_{22}$ | $U_{33}$ | $U_{23}$ | $U_{13}$ | $U_{12}$ |
|------|----------|----------|----------|----------|----------|----------|
| C20  | 26.0(8)  | 24.1(7)  | 38.0(9)  | 12.3(7)  | -0.5(6)  | -0.1(6)  |
| C21  | 24.5(7)  | 16.8(7)  | 32.2(8)  | 6.2(6)   | -4.0(6)  | 0.9(5)   |
| C22  | 31.1(8)  | 25.9(8)  | 35.0(9)  | 2.2(7)   | 8.2(7)   | 0.8(6)   |
| C23  | 31.9(8)  | 34.6(8)  | 36.2(9)  | -1.1(7)  | 5.9(7)   | 6.9(7)   |
| C24  | 37.9(9)  | 48.1(10) | 34.0(9)  | 10.9(8)  | 3.9(7)   | -10.8(8) |
| C25  | 31.3(8)  | 28.1(8)  | 25.6(8)  | 2.6(6)   | -0.3(6)  | -8.8(6)  |
| C26  | 48.1(10) | 21.3(7)  | 29.2(8)  | 6.0(6)   | 6.5(7)   | 4.4(7)   |
| C27  | 41.5(9)  | 24.8(8)  | 30.3(8)  | 4.2(6)   | 10.6(7)  | 6.2(7)   |
| C28  | 33.8(8)  | 19.9(7)  | 21.2(7)  | 1.1(6)   | -0.3(6)  | -4.5(6)  |
| C29  | 38.7(9)  | 19.3(7)  | 26.3(8)  | 1.9(6)   | 0.6(7)   | -0.2(6)  |
| C30  | 37.3(8)  | 19.3(7)  | 27.3(8)  | 3.3(6)   | 1.8(7)   | 1.4(6)   |
| C31  | 32.0(8)  | 19.9(7)  | 24.3(8)  | 5.0(6)   | 1.4(6)   | 2.7(6)   |
| C32  | 23.6(7)  | 21.3(7)  | 20.2(7)  | 4.6(6)   | 1.4(5)   | 2.8(5)   |
| C33  | 26.7(7)  | 19.7(7)  | 18.0(7)  | 4.6(5)   | -0.8(6)  | 4.0(5)   |
| C34  | 24.6(7)  | 24.0(7)  | 22.4(7)  | 5.5(6)   | 0.8(6)   | 2.5(6)   |
| C35  | 33.2(8)  | 20.7(7)  | 23.0(7)  | 3.8(6)   | -5.5(6)  | -0.5(6)  |
| C36  | 36.2(8)  | 25.9(7)  | 20.2(7)  | 0.9(6)   | -6.1(6)  | 10.4(6)  |
| C37  | 49.6(10) | 33.5(9)  | 33.2(9)  | -7.9(7)  | -8.2(8)  | 16.1(7)  |
| C38  | 25.1(7)  | 24.8(7)  | 22.2(7)  | 3.4(6)   | 0.0(6)   | 1.7(6)   |
| C39  | 26.5(8)  | 34.8(8)  | 22.7(8)  | 3.1(6)   | 0.3(6)   | 9.2(6)   |
| C40  | 23.8(7)  | 17.9(7)  | 25.9(8)  | 5.4(6)   | 1.9(6)   | 2.9(5)   |
| C41  | 26.4(7)  | 23.6(7)  | 24.4(8)  | 6.4(6)   | 2.4(6)   | 3.8(6)   |
| C42  | 31.5(8)  | 29.0(8)  | 22.2(7)  | 2.2(6)   | 4.6(6)   | 8.2(6)   |

**Table S3 Anisotropic Displacement Parameters ( $\text{\AA}^2 \times 10^3$ ) for 170449LT\_0m. The Anisotropic displacement factor exponent takes the form:  $-2\pi^2[h^2a^*^2U_{11}+2hka^*b^*U_{12}+\dots]$ .**

| Atom | $U_{11}$ | $U_{22}$ | $U_{33}$ | $U_{23}$ | $U_{13}$ | $U_{12}$ |
|------|----------|----------|----------|----------|----------|----------|
| C43  | 33.4(8)  | 22.3(7)  | 25.7(8)  | -0.2(6)  | 1.5(6)   | 9.8(6)   |
| C44  | 28.6(7)  | 16.9(6)  | 25.8(8)  | 1.8(6)   | -0.6(6)  | 6.4(5)   |
| C45  | 24.2(7)  | 38.7(9)  | 28.3(8)  | 1.4(7)   | -0.9(6)  | -0.6(6)  |
| C46  | 31.5(8)  | 27.5(8)  | 27.4(8)  | 3.1(6)   | -5.4(6)  | 1.6(6)   |

**Table S4 Bond Lengths for 170449LT\_0m.**

| Atom | Atom | Length/ $\text{\AA}$ | Atom | Atom | Length/ $\text{\AA}$ |
|------|------|----------------------|------|------|----------------------|
| N1   | C6   | 1.3866(17)           | C17  | C18  | 1.348(2)             |
| N1   | C17  | 1.3809(17)           | C18  | C19  | 1.425(2)             |
| N1   | C21  | 1.4014(17)           | C19  | C20  | 1.361(2)             |
| N2   | C7   | 1.3760(17)           | C20  | C21  | 1.409(2)             |
| N2   | C21  | 1.3277(18)           | C22  | C23  | 1.382(2)             |
| N3   | C32  | 1.3859(17)           | C24  | C25  | 1.508(2)             |
| N3   | C40  | 1.3799(16)           | C25  | C26  | 1.387(2)             |
| N3   | C44  | 1.3980(17)           | C25  | C45  | 1.393(2)             |
| N4   | C31  | 1.3777(19)           | C26  | C27  | 1.388(2)             |
| N4   | C44  | 1.3287(17)           | C27  | C28  | 1.394(2)             |
| C1   | C2   | 1.5085(19)           | C28  | C29  | 1.4391(19)           |
| C2   | C3   | 1.393(2)             | C28  | C46  | 1.397(2)             |
| C2   | C15  | 1.390(2)             | C29  | C30  | 1.197(2)             |
| C3   | C4   | 1.3858(18)           | C30  | C31  | 1.4320(19)           |
| C4   | C5   | 1.3978(19)           | C31  | C32  | 1.3847(19)           |
| C5   | C6   | 1.4660(18)           | C32  | C33  | 1.4691(19)           |

**Table S4 Bond Lengths for 170449LT\_0m.**

| Atom | Atom | Length/Å   | Atom | Atom | Length/Å   |
|------|------|------------|------|------|------------|
| C5   | C16  | 1.3972(19) | C33  | C34  | 1.397(2)   |
| C6   | C7   | 1.3874(19) | C33  | C38  | 1.3945(19) |
| C7   | C8   | 1.426(2)   | C34  | C35  | 1.389(2)   |
| C8   | C9   | 1.202(2)   | C35  | C36  | 1.389(2)   |
| C9   | C10  | 1.435(2)   | C36  | C37  | 1.509(2)   |
| C10  | C11  | 1.386(2)   | C36  | C39  | 1.390(2)   |
| C10  | C22  | 1.397(2)   | C38  | C39  | 1.385(2)   |
| C11  | C12  | 1.387(2)   | C40  | C41  | 1.351(2)   |
| C12  | C13  | 1.384(3)   | C41  | C42  | 1.419(2)   |
| C13  | C14  | 1.512(2)   | C42  | C43  | 1.3622(19) |
| C13  | C23  | 1.380(2)   | C43  | C44  | 1.413(2)   |
| C15  | C16  | 1.3861(19) | C45  | C46  | 1.382(2)   |

**Table S5 Bond Angles for 170449LT\_0m.**

| Atom | Atom | Atom | Angle/°    | Atom | Atom | Atom | Angle/°    |
|------|------|------|------------|------|------|------|------------|
| C6   | N1   | C21  | 107.21(11) | N2   | C21  | N1   | 111.30(12) |
| C17  | N1   | C6   | 131.05(11) | N2   | C21  | C20  | 130.10(13) |
| C17  | N1   | C21  | 121.73(12) | C23  | C22  | C10  | 120.66(14) |
| C21  | N2   | C7   | 104.87(11) | C13  | C23  | C22  | 121.33(15) |
| C32  | N3   | C44  | 107.35(11) | C26  | C25  | C24  | 121.18(14) |
| C40  | N3   | C32  | 130.56(11) | C26  | C25  | C45  | 117.94(13) |
| C40  | N3   | C44  | 121.85(11) | C45  | C25  | C24  | 120.88(15) |
| C44  | N4   | C31  | 104.78(11) | C25  | C26  | C27  | 121.27(14) |

**Table S5 Bond Angles for 170449LT\_0m.**

| Atom | Atom | Atom | Angle/°    | Atom | Atom | Atom | Angle/°    |
|------|------|------|------------|------|------|------|------------|
| C3   | C2   | C1   | 121.54(14) | C26  | C27  | C28  | 120.45(14) |
| C15  | C2   | C1   | 120.55(13) | C27  | C28  | C29  | 120.49(13) |
| C15  | C2   | C3   | 117.90(13) | C27  | C28  | C46  | 118.57(13) |
| C4   | C3   | C2   | 121.31(13) | C46  | C28  | C29  | 120.94(13) |
| C3   | C4   | C5   | 120.50(13) | C30  | C29  | C28  | 178.90(18) |
| C4   | C5   | C6   | 122.65(12) | C29  | C30  | C31  | 177.32(17) |
| C16  | C5   | C4   | 118.33(12) | N4   | C31  | C30  | 120.84(12) |
| C16  | C5   | C6   | 119.00(13) | N4   | C31  | C32  | 112.34(12) |
| N1   | C6   | C5   | 125.08(12) | C32  | C31  | C30  | 126.80(14) |
| N1   | C6   | C7   | 104.28(11) | N3   | C32  | C33  | 123.59(11) |
| C7   | C6   | C5   | 130.63(13) | C31  | C32  | N3   | 104.26(12) |
| N2   | C7   | C6   | 112.34(12) | C31  | C32  | C33  | 132.02(12) |
| N2   | C7   | C8   | 120.77(12) | C34  | C33  | C32  | 122.01(12) |
| C6   | C7   | C8   | 126.85(13) | C38  | C33  | C32  | 119.78(12) |
| C9   | C8   | C7   | 178.36(15) | C38  | C33  | C34  | 118.21(13) |
| C8   | C9   | C10  | 176.85(16) | C35  | C34  | C33  | 120.58(13) |
| C11  | C10  | C9   | 121.15(13) | C36  | C35  | C34  | 121.27(13) |
| C11  | C10  | C22  | 118.17(14) | C35  | C36  | C37  | 121.37(14) |
| C22  | C10  | C9   | 120.65(13) | C35  | C36  | C39  | 117.82(13) |
| C10  | C11  | C12  | 120.34(15) | C39  | C36  | C37  | 120.80(14) |
| C13  | C12  | C11  | 121.62(15) | C39  | C38  | C33  | 120.57(13) |
| C12  | C13  | C14  | 121.67(16) | C38  | C39  | C36  | 121.53(13) |
| C23  | C13  | C12  | 117.88(15) | C41  | C40  | N3   | 118.96(12) |
| C23  | C13  | C14  | 120.44(16) | C40  | C41  | C42  | 120.84(13) |

**Table S5 Bond Angles for 170449LT\_0m.**

| Atom | Atom | Atom | Angle/°    | Atom | Atom | Atom | Angle/°    |
|------|------|------|------------|------|------|------|------------|
| C16  | C15  | C2   | 121.41(13) | C43  | C42  | C41  | 120.53(13) |
| C15  | C16  | C5   | 120.48(13) | C42  | C43  | C44  | 119.20(13) |
| C18  | C17  | N1   | 119.01(13) | N3   | C44  | C43  | 118.58(12) |
| C17  | C18  | C19  | 120.89(14) | N4   | C44  | N3   | 111.26(12) |
| C20  | C19  | C18  | 120.29(14) | N4   | C44  | C43  | 130.11(13) |
| C19  | C20  | C21  | 119.44(13) | C46  | C45  | C25  | 121.46(14) |
| N1   | C21  | C20  | 118.59(13) | C45  | C46  | C28  | 120.30(14) |

**Table S6 Torsion Angles for 170449LT\_0m.**

| A  | B   | C   | D   | Angle/°     | A   | B   | C   | D   | Angle/°     |
|----|-----|-----|-----|-------------|-----|-----|-----|-----|-------------|
| N1 | C6  | C7  | N2  | 0.46(15)    | C21 | N1  | C6  | C7  | -0.41(14)   |
| N1 | C6  | C7  | C8  | 178.38(13)  | C21 | N1  | C17 | C18 | -2.5(2)     |
| N1 | C17 | C18 | C19 | 1.1(2)      | C21 | N2  | C7  | C6  | -0.32(16)   |
| N3 | C32 | C33 | C34 | 49.56(19)   | C21 | N2  | C7  | C8  | -178.39(13) |
| N3 | C32 | C33 | C38 | -130.18(14) | C22 | C10 | C11 | C12 | -0.4(2)     |
| N3 | C40 | C41 | C42 | -0.6(2)     | C24 | C25 | C26 | C27 | -178.93(15) |
| N4 | C31 | C32 | N3  | -0.10(16)   | C24 | C25 | C45 | C46 | 179.10(15)  |
| N4 | C31 | C32 | C33 | -176.10(14) | C25 | C26 | C27 | C28 | -0.1(3)     |
| C1 | C2  | C3  | C4  | -179.20(13) | C25 | C45 | C46 | C28 | -0.3(2)     |
| C1 | C2  | C15 | C16 | 178.67(13)  | C26 | C25 | C45 | C46 | -0.8(2)     |
| C2 | C3  | C4  | C5  | 0.6(2)      | C26 | C27 | C28 | C29 | 178.34(15)  |
| C2 | C15 | C16 | C5  | 0.4(2)      | C26 | C27 | C28 | C46 | -1.0(2)     |
| C3 | C2  | C15 | C16 | -2.0(2)     | C27 | C28 | C46 | C45 | 1.2(2)      |

**Table S6 Torsion Angles for 170449LT\_0m.**

| A   | B   | C   | D   | Angle/°     | A   | B   | C   | D   | Angle/°     |
|-----|-----|-----|-----|-------------|-----|-----|-----|-----|-------------|
| C3  | C4  | C5  | C6  | 179.36(12)  | C29 | C28 | C46 | C45 | -178.17(14) |
| C3  | C4  | C5  | C16 | -2.28(19)   | C30 | C31 | C32 | N3  | 178.65(14)  |
| C4  | C5  | C6  | N1  | -42.2(2)    | C30 | C31 | C32 | C33 | 2.7(3)      |
| C4  | C5  | C6  | C7  | 137.15(15)  | C31 | N4  | C44 | N3  | -0.73(16)   |
| C4  | C5  | C16 | C15 | 1.77(19)    | C31 | N4  | C44 | C43 | 176.83(15)  |
| C5  | C6  | C7  | N2  | -178.95(13) | C31 | C32 | C33 | C34 | -135.10(16) |
| C5  | C6  | C7  | C8  | -1.0(2)     | C31 | C32 | C33 | C38 | 45.2(2)     |
| C6  | N1  | C17 | C18 | 178.48(13)  | C32 | N3  | C40 | C41 | 175.82(13)  |
| C6  | N1  | C21 | N2  | 0.24(16)    | C32 | N3  | C44 | N4  | 0.70(15)    |
| C6  | N1  | C21 | C20 | -178.74(13) | C32 | N3  | C44 | C43 | -177.18(12) |
| C6  | C5  | C16 | C15 | -179.81(12) | C32 | C33 | C34 | C35 | -178.28(12) |
| C7  | N2  | C21 | N1  | 0.05(15)    | C32 | C33 | C38 | C39 | 178.60(12)  |
| C7  | N2  | C21 | C20 | 178.88(15)  | C33 | C34 | C35 | C36 | -0.6(2)     |
| C9  | C10 | C11 | C12 | 177.73(16)  | C33 | C38 | C39 | C36 | 0.0(2)      |
| C9  | C10 | C22 | C23 | -177.76(15) | C34 | C33 | C38 | C39 | -1.14(19)   |
| C10 | C11 | C12 | C13 | -0.1(3)     | C34 | C35 | C36 | C37 | 179.72(13)  |
| C10 | C22 | C23 | C13 | 0.1(2)      | C34 | C35 | C36 | C39 | -0.6(2)     |
| C11 | C10 | C22 | C23 | 0.4(2)      | C35 | C36 | C39 | C38 | 0.9(2)      |
| C11 | C12 | C13 | C14 | -178.68(17) | C37 | C36 | C39 | C38 | -179.40(13) |
| C11 | C12 | C13 | C23 | 0.6(3)      | C38 | C33 | C34 | C35 | 1.46(19)    |
| C12 | C13 | C23 | C22 | -0.6(2)     | C40 | N3  | C32 | C31 | -174.69(13) |
| C14 | C13 | C23 | C22 | 178.68(16)  | C40 | N3  | C32 | C33 | 1.7(2)      |
| C15 | C2  | C3  | C4  | 1.5(2)      | C40 | N3  | C44 | N4  | 175.65(12)  |
| C16 | C5  | C6  | N1  | 139.49(14)  | C40 | N3  | C44 | C43 | -2.23(19)   |



**Table S6 Torsion Angles for 170449LT\_0m.**

| A   | B   | C   | D   | Angle/°     | A   | B   | C   | D   | Angle/°     |
|-----|-----|-----|-----|-------------|-----|-----|-----|-----|-------------|
| C16 | C5  | C6  | C7  | -41.2(2)    | C40 | C41 | C42 | C43 | -0.8(2)     |
| C17 | N1  | C6  | C5  | -1.8(2)     | C41 | C42 | C43 | C44 | 0.7(2)      |
| C17 | N1  | C6  | C7  | 178.72(13)  | C42 | C43 | C44 | N3  | 0.7(2)      |
| C17 | N1  | C21 | N2  | -178.99(12) | C42 | C43 | C44 | N4  | -176.69(15) |
| C17 | N1  | C21 | C20 | 2.0(2)      | C44 | N3  | C32 | C31 | -0.34(15)   |
| C17 | C18 | C19 | C20 | 0.7(2)      | C44 | N3  | C32 | C33 | 176.09(12)  |
| C18 | C19 | C20 | C21 | -1.2(2)     | C44 | N3  | C40 | C41 | 2.18(19)    |
| C19 | C20 | C21 | N1  | -0.2(2)     | C44 | N4  | C31 | C30 | -178.32(14) |
| C19 | C20 | C21 | N2  | -178.92(15) | C44 | N4  | C31 | C32 | 0.52(17)    |
| C21 | N1  | C6  | C5  | 179.05(12)  | C45 | C25 | C26 | C27 | 0.9(2)      |

**Table S7 Hydrogen Atom Coordinates ( $\text{\AA} \times 10^4$ ) and Isotropic Displacement Parameters ( $\text{\AA}^2 \times 10^3$ ) for 170449LT\_0m.**

| Atom | x       | y       | z        | U(eq) |
|------|---------|---------|----------|-------|
| H1A  | 6007.21 | 284.11  | 9117.76  | 56    |
| H1B  | 7325.44 | 132.8   | 9766.29  | 56    |
| H1C  | 7139.48 | -425.21 | 8707.94  | 56    |
| H3   | 7741.31 | 613.61  | 7367.41  | 29    |
| H4   | 9003.19 | 2080.75 | 6826.66  | 26    |
| H11  | 6827.24 | 4926.52 | 10529.94 | 47    |
| H12  | 5516.44 | 5741.36 | 11657.2  | 56    |
| H14A | 4307.43 | 7303.32 | 12153.15 | 82    |
| H14B | 4923.15 | 8423.59 | 11835.83 | 82    |
| H14C | 5719.58 | 7914.99 | 12641.79 | 82    |

**Table S7 Hydrogen Atom Coordinates ( $\text{\AA}\times 10^4$ ) and Isotropic Displacement Parameters ( $\text{\AA}^2\times 10^3$ ) for 170449LT\_0m.**

| <b>Atom</b> | <b>x</b> | <b>y</b> | <b>z</b> | <b>U(eq)</b> |
|-------------|----------|----------|----------|--------------|
| H15         | 8088.3   | 2032.28  | 10033.8  | 32           |
| H16         | 9380.67  | 3495.76  | 9509.28  | 30           |
| H17         | 11425.59 | 2333.37  | 6759.14  | 29           |
| H18         | 13122.16 | 2690.24  | 5688.37  | 33           |
| H19         | 13976.26 | 4445.85  | 5453.83  | 37           |
| H20         | 13136.12 | 5828.02  | 6320.28  | 35           |
| H22         | 8035.99  | 7746.38  | 9571.71  | 37           |
| H23         | 6719.12  | 8541.64  | 10702.27 | 41           |
| H24A        | 5238.62  | 13473    | 1154.36  | 61           |
| H24B        | 5792.94  | 12408.34 | 743.8    | 61           |
| H24C        | 6706.45  | 13193.95 | 1525.3   | 61           |
| H26         | 3514.74  | 13263.96 | 2287.04  | 39           |
| H27         | 2437.29  | 12406.96 | 3496.51  | 38           |
| H34         | 7.37     | 7054.2   | 5350.52  | 28           |
| H35         | 432.33   | 5562.12  | 4405.18  | 31           |
| H37A        | 2821.73  | 5297.11  | 2819.25  | 58           |
| H37B        | 1902.54  | 4571.68  | 3486.56  | 58           |
| H37C        | 3536.23  | 4874.19  | 3710.56  | 58           |
| H38         | 3896.09  | 8431.5   | 4905.72  | 29           |
| H39         | 4294.54  | 6943.19  | 3953.29  | 33           |
| H40         | 836.74   | 7264.02  | 7005.59  | 27           |
| H41         | 153.72   | 7574.47  | 8537.59  | 29           |
| H42         | 105.15   | 9307.23  | 9225.78  | 33           |

**Table S7 Hydrogen Atom Coordinates ( $\text{\AA} \times 10^4$ ) and Isotropic Displacement Parameters ( $\text{\AA}^2 \times 10^3$ ) for 170449LT\_0m.**

| Atom | x       | y        | z       | U(eq) |
|------|---------|----------|---------|-------|
| H43  | 786.17  | 10723.62 | 8379.21 | 32    |
| H45  | 6329.82 | 11205.46 | 2116.24 | 37    |
| H46  | 5261.86 | 10335.62 | 3316.4  | 35    |

## Experimental

Single crystals of  $\text{C}_{46}\text{H}_{36}\text{N}_4$  [170449LT\_0m] were [1]. A suitable crystal was selected and [1] on a **Bruker APEX-II CCD** diffractometer. The crystal was kept at 100.15 K during data collection. Using Olex2 [1], the structure was solved with the SHELXT [2] structure solution program using Intrinsic Phasing and refined with the SHELXL [3] refinement package using Least Squares minimisation.

1. Dolomanov, O.V., Bourhis, L.J., Gildea, R.J., Howard, J.A.K. & Puschmann, H. (2009), *J. Appl. Cryst.* 42, 339-341.
2. Sheldrick, G.M. (2015). *Acta Cryst.* A71, 3-8.
3. Sheldrick, G.M. (2015). *Acta Cryst.* C71, 3-8.

## Crystal structure determination of [170449LT\_0m]

**Crystal Data** for  $\text{C}_{46}\text{H}_{36}\text{N}_4$  ( $M=644.79$  g/mol): triclinic, space group P-1 (no. 2),  $a = 9.6958(4)$   $\text{\AA}$ ,  $b = 12.8863(5)$   $\text{\AA}$ ,  $c = 14.1978(5)$   $\text{\AA}$ ,  $\alpha = 95.348(2)^\circ$ ,  $\beta = 91.322(2)^\circ$ ,  $\gamma = 97.198(2)^\circ$ ,  $V = 1751.19(12)$   $\text{\AA}^3$ ,  $Z = 2$ ,  $T = 100.15$  K,  $\mu(\text{MoK}\alpha) = 0.072$   $\text{mm}^{-1}$ ,  $D_{\text{calc}} = 1.223$   $\text{g/cm}^3$ , 21609 reflections measured ( $4.096^\circ \leq 2\theta \leq 52.808^\circ$ ), 6900 unique ( $R_{\text{int}} = 0.0274$ ,  $R_{\text{sigma}} = 0.0320$ ) which were used in all calculations. The final  $R_1$  was 0.0416 ( $I > 2\sigma(I)$ ) and  $wR_2$  was 0.1069 (all data).

## Refinement model description

Number of restraints - 0, number of constraints - unknown.

Details:

1. Fixed Uiso

At 1.2 times of:

All C(H) groups

At 1.5 times of:

All C(H,H,H) groups

2.a Aromatic/amide H refined with riding coordinates:

C3(H3), C4(H4), C11(H11), C12(H12), C15(H15), C16(H16), C17(H17), C18(H18),  
C19(H19), C20(H20), C22(H22), C23(H23), C26(H26), C27(H27), C34(H34), C35(H35),  
C38(H38), C39(H39), C40(H40), C41(H41), C42(H42), C43(H43), C45(H45), C46(H46)

2.b Idealised Me refined as rotating group:

C1(H1A,H1B,H1C), C14(H14A,H14B,H14C), C24(H24A,H24B,H24C),  
C37(H37A,H37B,H37C)

This report has been created with Olex2, compiled on 2023.08.24 svn.re1ec1418 for OlexSys. Please [let us know](#) if there are any errors or if you would like to have additional features.

**Figure S5.** ORTEP diagram of compound **10** (CCDC No. 2287150)

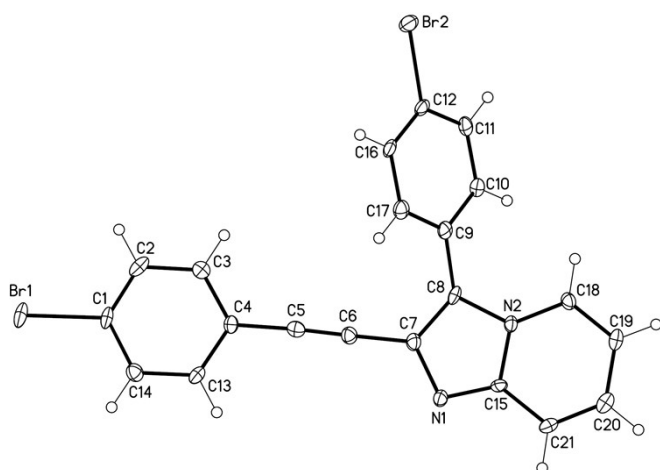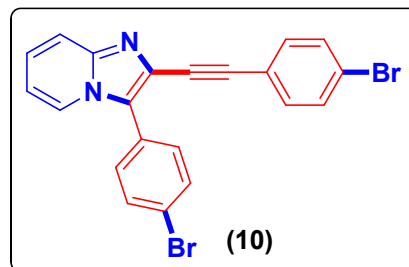

**Table S8.** Crystal data and structure refinement for mo\_170754lt\_0m.

|                        |                                                                |                 |
|------------------------|----------------------------------------------------------------|-----------------|
| Identification code    | mo_170754LT_0m                                                 |                 |
| Empirical formula      | C <sub>21</sub> H <sub>12</sub> Br <sub>2</sub> N <sub>2</sub> |                 |
| Formula weight         | 452.15                                                         |                 |
| Temperature            | 100(2) K                                                       |                 |
| Wavelength             | 0.71073 Å                                                      |                 |
| Crystal system         | Monoclinic                                                     |                 |
| Space group            | P 21                                                           |                 |
| Unit cell dimensions   | a = 3.8778(5) Å                                                | a = 90°.        |
|                        | b = 12.9392(17) Å                                              | b = 92.968(3)°. |
|                        | c = 16.735(2) Å                                                | g = 90°.        |
| Volume                 | 838.57(19) Å <sup>3</sup>                                      |                 |
| Z                      | 2                                                              |                 |
| Density (calculated)   | 1.791 Mg/m <sup>3</sup>                                        |                 |
| Absorption coefficient | 4.839 mm <sup>-1</sup>                                         |                 |
| F(000)                 | 444                                                            |                 |
| Crystal size           | 0.20 x 0.18 x 0.02 mm <sup>3</sup>                             |                 |

|                                   |                                             |
|-----------------------------------|---------------------------------------------|
| Theta range for data collection   | 1.218 to 26.303°.                           |
| Index ranges                      | -4<=h<=4, -16<=k<=15, -20<=l<=19            |
| Reflections collected             | 6578                                        |
| Independent reflections           | 3304 [R(int) = 0.0295]                      |
| Completeness to theta = 25.242°   | 100.0 %                                     |
| Absorption correction             | Semi-empirical from equivalents             |
| Max. and min. transmission        | 0.9485 and 0.7232                           |
| Refinement method                 | Full-matrix least-squares on F <sup>2</sup> |
| Data / restraints / parameters    | 3304 / 1 / 226                              |
| Goodness-of-fit on F <sup>2</sup> | 0.951                                       |
| Final R indices [I>2sigma(I)]     | R1 = 0.0255, wR2 = 0.0540                   |
| R indices (all data)              | R1 = 0.0297, wR2 = 0.0549                   |
| Absolute structure parameter      | 0.025(7)                                    |
| Extinction coefficient            | n/a                                         |
| Largest diff. peak and hole       | 0.408 and -0.479 e.Å <sup>-3</sup>          |

**Table S9.** Atomic coordinates ( x 10<sup>4</sup>) and equivalent isotropic displacement parameters (Å<sup>2</sup>x 10<sup>3</sup>) for mo\_170754lt\_0m. U(eq) is defined as one third of the trace of the orthogonalized U<sup>ij</sup> tensor.

|       | x        | y        | z       | U(eq) |
|-------|----------|----------|---------|-------|
| Br(1) | -2478(1) | 13896(1) | -83(1)  | 20(1) |
| Br(2) | 6264(1)  | 6155(1)  | 1250(1) | 18(1) |
| N(1)  | 6927(11) | 10831(3) | 4695(2) | 14(1) |
| N(2)  | 8254(11) | 9128(3)  | 4777(2) | 12(1) |
| C(1)  | -615(13) | 13072(5) | 782(3)  | 14(1) |
| C(2)  | -840(15) | 12013(5) | 737(3)  | 18(1) |
| C(3)  | 437(14)  | 11434(4) | 1379(3) | 18(1) |
| C(4)  | 1972(13) | 11915(4) | 2060(3) | 13(1) |
| C(5)  | 3324(13) | 11325(4) | 2739(3) | 13(1) |
| C(6)  | 4520(13) | 10879(4) | 3310(3) | 14(1) |
| C(7)  | 6050(14) | 10332(4) | 3982(3) | 14(1) |
| C(8)  | 6835(13) | 9297(4)  | 4002(3) | 12(1) |
| C(9)  | 6599(13) | 8521(4)  | 3366(3) | 13(1) |

|       |           |          |         |       |
|-------|-----------|----------|---------|-------|
| C(10) | 5339(13)  | 7517(4)  | 3470(3) | 14(1) |
| C(11) | 5215(13)  | 6821(4)  | 2835(3) | 15(1) |
| C(12) | 6328(13)  | 7128(4)  | 2101(3) | 13(1) |
| C(13) | 2174(13)  | 12986(4) | 2081(3) | 14(1) |
| C(14) | 908(13)   | 13576(4) | 1444(3) | 16(1) |
| C(15) | 8287(13)  | 10086(4) | 5156(3) | 12(1) |
| C(16) | 7571(14)  | 8108(4)  | 1980(3) | 14(1) |
| C(17) | 7704(12)  | 8804(5)  | 2614(3) | 15(1) |
| C(18) | 9573(14)  | 8253(4)  | 5145(3) | 14(1) |
| C(19) | 10996(13) | 8314(4)  | 5902(3) | 16(1) |
| C(20) | 11127(14) | 9286(4)  | 6299(3) | 18(1) |
| C(21) | 9798(13)  | 10149(4) | 5942(3) | 13(1) |

---

**Table S10.** Bond lengths [Å] and angles [°] for mo\_170754lt\_0m.

|             |          |
|-------------|----------|
| Br(1)-C(1)  | 1.910(5) |
| Br(2)-C(12) | 1.900(5) |
| N(1)-C(15)  | 1.327(6) |
| N(1)-C(7)   | 1.384(6) |
| N(2)-C(18)  | 1.375(6) |
| N(2)-C(15)  | 1.391(6) |
| N(2)-C(8)   | 1.400(5) |
| C(1)-C(2)   | 1.374(7) |
| C(1)-C(14)  | 1.391(7) |
| C(2)-C(3)   | 1.380(7) |
| C(2)-H(12)  | 0.9500   |
| C(3)-C(4)   | 1.403(7) |
| C(3)-H(1)   | 0.9500   |
| C(4)-C(13)  | 1.389(7) |
| C(4)-C(5)   | 1.444(6) |
| C(5)-C(6)   | 1.190(6) |
| C(6)-C(7)   | 1.432(6) |
| C(7)-C(8)   | 1.374(7) |
| C(8)-C(9)   | 1.462(7) |

|             |          |
|-------------|----------|
| C(9)-C(17)  | 1.399(7) |
| C(9)-C(10)  | 1.402(7) |
| C(10)-C(11) | 1.392(7) |
| C(10)-H(4)  | 0.9500   |
| C(11)-C(12) | 1.381(7) |
| C(11)-H(7)  | 0.9500   |
| C(12)-C(16) | 1.375(8) |
| C(13)-C(14) | 1.380(7) |
| C(13)-H(3)  | 0.9500   |
| C(14)-H(2)  | 0.9500   |
| C(15)-C(21) | 1.413(6) |
| C(16)-C(17) | 1.390(7) |
| C(16)-H(5)  | 0.9500   |
| C(17)-H(6)  | 0.9500   |
| C(18)-C(19) | 1.359(6) |
| C(18)-H(11) | 0.9500   |
| C(19)-C(20) | 1.421(8) |
| C(19)-H(10) | 0.9500   |
| C(20)-C(21) | 1.355(7) |
| C(20)-H(8)  | 0.9500   |
| C(21)-H(9)  | 0.9500   |

|                  |          |
|------------------|----------|
| C(15)-N(1)-C(7)  | 103.6(4) |
| C(18)-N(2)-C(15) | 122.4(4) |
| C(18)-N(2)-C(8)  | 131.5(4) |
| C(15)-N(2)-C(8)  | 106.1(4) |
| C(2)-C(1)-C(14)  | 122.3(5) |
| C(2)-C(1)-Br(1)  | 119.7(4) |
| C(14)-C(1)-Br(1) | 118.1(4) |
| C(1)-C(2)-C(3)   | 118.6(5) |
| C(1)-C(2)-H(12)  | 120.7    |
| C(3)-C(2)-H(12)  | 120.7    |
| C(2)-C(3)-C(4)   | 120.8(5) |
| C(2)-C(3)-H(1)   | 119.6    |
| C(4)-C(3)-H(1)   | 119.6    |
| C(13)-C(4)-C(3)  | 118.9(4) |

|                   |          |
|-------------------|----------|
| C(13)-C(4)-C(5)   | 119.4(4) |
| C(3)-C(4)-C(5)    | 121.7(5) |
| C(6)-C(5)-C(4)    | 176.9(5) |
| C(5)-C(6)-C(7)    | 178.2(6) |
| C(8)-C(7)-N(1)    | 113.0(4) |
| C(8)-C(7)-C(6)    | 125.7(4) |
| N(1)-C(7)-C(6)    | 121.3(5) |
| C(7)-C(8)-N(2)    | 104.5(4) |
| C(7)-C(8)-C(9)    | 130.3(4) |
| N(2)-C(8)-C(9)    | 125.1(4) |
| C(17)-C(9)-C(10)  | 118.6(5) |
| C(17)-C(9)-C(8)   | 117.7(5) |
| C(10)-C(9)-C(8)   | 123.7(5) |
| C(11)-C(10)-C(9)  | 120.3(5) |
| C(11)-C(10)-H(4)  | 119.9    |
| C(9)-C(10)-H(4)   | 119.9    |
| C(12)-C(11)-C(10) | 119.5(5) |
| C(12)-C(11)-H(7)  | 120.2    |
| C(10)-C(11)-H(7)  | 120.2    |
| C(16)-C(12)-C(11) | 121.6(5) |
| C(16)-C(12)-Br(2) | 119.5(4) |
| C(11)-C(12)-Br(2) | 118.9(4) |
| C(14)-C(13)-C(4)  | 121.0(4) |
| C(14)-C(13)-H(3)  | 119.5    |
| C(4)-C(13)-H(3)   | 119.5    |
| C(13)-C(14)-C(1)  | 118.4(5) |
| C(13)-C(14)-H(2)  | 120.8    |
| C(1)-C(14)-H(2)   | 120.8    |
| N(1)-C(15)-N(2)   | 112.8(4) |
| N(1)-C(15)-C(21)  | 129.2(5) |
| N(2)-C(15)-C(21)  | 117.9(4) |
| C(12)-C(16)-C(17) | 119.0(5) |
| C(12)-C(16)-H(5)  | 120.5    |
| C(17)-C(16)-H(5)  | 120.5    |
| C(16)-C(17)-C(9)  | 121.1(5) |
| C(16)-C(17)-H(6)  | 119.5    |



|                   |          |
|-------------------|----------|
| C(9)-C(17)-H(6)   | 119.5    |
| C(19)-C(18)-N(2)  | 119.5(5) |
| C(19)-C(18)-H(11) | 120.2    |
| N(2)-C(18)-H(11)  | 120.2    |
| C(18)-C(19)-C(20) | 119.3(5) |
| C(18)-C(19)-H(10) | 120.3    |
| C(20)-C(19)-H(10) | 120.3    |
| C(21)-C(20)-C(19) | 121.3(4) |
| C(21)-C(20)-H(8)  | 119.4    |
| C(19)-C(20)-H(8)  | 119.4    |
| C(20)-C(21)-C(15) | 119.5(5) |
| C(20)-C(21)-H(9)  | 120.2    |
| C(15)-C(21)-H(9)  | 120.2    |

---

Symmetry transformations used to generate equivalent atoms:

**Table S11.** Anisotropic displacement parameters ( $\text{\AA}^2 \times 10^3$ ) for mo\_170754lt\_0m. The anisotropic displacement factor exponent takes the form:  $-2p^2 [ h^2 a^*2U^{11} + \dots + 2 h k a^* b^* U^{12} ]$

|       | U11   | U22   | U33   | U23   | U13   | U12   |
|-------|-------|-------|-------|-------|-------|-------|
| Br(1) | 17(1) | 32(1) | 12(1) | 7(1)  | -2(1) | 6(1)  |
| Br(2) | 20(1) | 21(1) | 14(1) | -4(1) | -3(1) | 2(1)  |
| N(1)  | 16(2) | 13(2) | 12(2) | 2(2)  | -4(2) | -1(2) |
| N(2)  | 15(2) | 12(3) | 10(2) | 3(2)  | -1(2) | 0(2)  |
| C(1)  | 10(3) | 23(3) | 9(3)  | 6(2)  | 0(2)  | 3(2)  |
| C(2)  | 16(3) | 29(4) | 9(3)  | -2(3) | -1(2) | -2(3) |
| C(3)  | 22(3) | 14(3) | 17(3) | 0(2)  | -1(2) | 0(2)  |
| C(4)  | 11(3) | 15(3) | 13(3) | 2(2)  | -1(2) | 1(2)  |
| C(5)  | 12(2) | 12(3) | 16(3) | 0(2)  | 3(2)  | -3(2) |
| C(6)  | 13(3) | 14(3) | 15(3) | 1(2)  | -1(2) | 0(2)  |
| C(7)  | 16(3) | 13(3) | 12(3) | 3(2)  | 0(2)  | 0(2)  |
| C(8)  | 10(3) | 19(3) | 7(2)  | 3(2)  | 0(2)  | 0(2)  |
| C(9)  | 9(3)  | 16(3) | 14(3) | 1(2)  | -2(2) | 3(2)  |

|       |       |       |       |       |       |       |
|-------|-------|-------|-------|-------|-------|-------|
| C(10) | 13(3) | 16(3) | 13(2) | 3(2)  | -1(2) | 0(2)  |
| C(11) | 12(3) | 14(3) | 17(3) | 4(2)  | -3(2) | 1(2)  |
| C(12) | 12(3) | 17(3) | 10(3) | -1(2) | -4(2) | 1(2)  |
| C(13) | 14(3) | 19(3) | 9(2)  | -1(2) | -2(2) | 0(2)  |
| C(14) | 14(3) | 14(3) | 19(3) | 1(2)  | -1(2) | 1(2)  |
| C(15) | 13(3) | 11(3) | 12(3) | -3(2) | -2(2) | -2(2) |
| C(16) | 16(3) | 18(3) | 7(3)  | 2(2)  | -2(2) | 3(2)  |
| C(17) | 13(3) | 17(3) | 16(2) | 2(2)  | -3(2) | -1(2) |
| C(18) | 18(3) | 12(3) | 12(2) | 3(2)  | 3(2)  | 2(2)  |
| C(19) | 16(3) | 21(3) | 12(2) | 6(2)  | -1(2) | 0(2)  |
| C(20) | 16(3) | 25(3) | 12(3) | 1(2)  | -1(2) | -1(2) |
| C(21) | 10(3) | 18(3) | 11(2) | -5(2) | 1(2)  | 0(2)  |

**Table S12.** Hydrogen coordinates ( x 10<sup>4</sup>) and isotropic displacement parameters (Å<sup>2</sup>x 10<sup>3</sup>) for mo\_170754lt\_0m.

|       | x     | y     | z    | U(eq) |
|-------|-------|-------|------|-------|
| H(12) | -1853 | 11686 | 274  | 22    |
| H(1)  | 274   | 10702 | 1360 | 21    |
| H(4)  | 4566  | 7311  | 3975 | 17    |
| H(7)  | 4372  | 6140  | 2906 | 18    |
| H(3)  | 3199  | 13318 | 2541 | 17    |
| H(2)  | 1072  | 14308 | 1458 | 19    |
| H(5)  | 8328  | 8306  | 1472 | 17    |
| H(6)  | 8559  | 9482  | 2535 | 18    |
| H(11) | 9490  | 7610  | 4871 | 17    |
| H(10) | 11894 | 7714  | 6165 | 20    |
| H(8)  | 12166 | 9332  | 6824 | 21    |
| H(9)  | 9882  | 10791 | 6217 | 16    |

**Figure S6.** ORTEP diagram of compound **13** (CCDC No. 2287146)

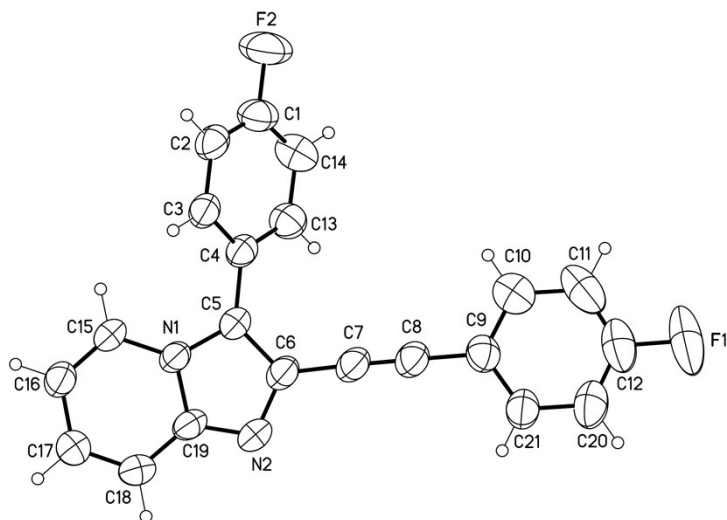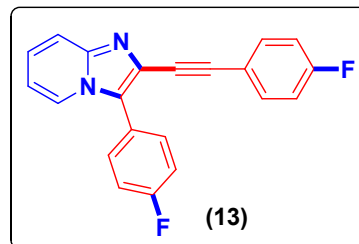

**Table S13.** Crystal data and structure refinement for 170613LT\_0M.

|                                 |                                                               |                 |
|---------------------------------|---------------------------------------------------------------|-----------------|
| Identification code             | 170613LT_0m                                                   |                 |
| Empirical formula               | C <sub>21</sub> H <sub>12</sub> F <sub>2</sub> N <sub>2</sub> |                 |
| Formula weight                  | 330.33                                                        |                 |
| Temperature                     | 100(2) K                                                      |                 |
| Wavelength                      | 0.71073 Å                                                     |                 |
| Crystal system                  | Monoclinic                                                    |                 |
| Space group                     | C 2/c                                                         |                 |
| Unit cell dimensions            | a = 14.4478(6) Å                                              | a = 90°.        |
|                                 | b = 17.5319(7) Å                                              | b = 99.180(2)°. |
|                                 | c = 12.9774(4) Å                                              | g = 90°.        |
| Volume                          | 3245.0(2) Å <sup>3</sup>                                      |                 |
| Z                               | 8                                                             |                 |
| Density (calculated)            | 1.352 Mg/m <sup>3</sup>                                       |                 |
| Absorption coefficient          | 0.096 mm <sup>-1</sup>                                        |                 |
| F(000)                          | 1360                                                          |                 |
| Crystal size                    | 0.22 x 0.20 x 0.19 mm <sup>3</sup>                            |                 |
| Theta range for data collection | 1.841 to 26.387°.                                             |                 |

|                                   |                                             |
|-----------------------------------|---------------------------------------------|
| Index ranges                      | -18<=h<=18, -21<=k<=21, -16<=l<=13          |
| Reflections collected             | 12325                                       |
| Independent reflections           | 3321 [R(int) = 0.0305]                      |
| Completeness to theta = 25.242°   | 100.0 %                                     |
| Absorption correction             | Semi-empirical from equivalents             |
| Max. and min. transmission        | 0.9485 and 0.9055                           |
| Refinement method                 | Full-matrix least-squares on F <sup>2</sup> |
| Data / restraints / parameters    | 3321 / 0 / 226                              |
| Goodness-of-fit on F <sup>2</sup> | 1.023                                       |
| Final R indices [I>2sigma(I)]     | R1 = 0.0463, wR2 = 0.1156                   |
| R indices (all data)              | R1 = 0.0681, wR2 = 0.1316                   |
| Extinction coefficient            | n/a                                         |
| Largest diff. peak and hole       | 0.245 and -0.224 e.Å <sup>-3</sup>          |

**Table S14.** Atomic coordinates ( $\times 10^4$ ) and equivalent isotropic displacement parameters ( $\text{\AA}^2 \times 10^3$ ) for 170613LT\_0M.  $U(\text{eq})$  is defined as one third of the trace of the orthogonalized  $U_{ij}$  tensor.

|       |         |         |          |        |
|-------|---------|---------|----------|--------|
| F(1)  | 1448(1) | -314(1) | 10452(2) | 138(1) |
| F(2)  | 1189(1) | 1643(1) | 2919(1)  | 97(1)  |
| N(1)  | 1201(1) | 4558(1) | 5991(1)  | 44(1)  |
| N(2)  | 1238(1) | 4340(1) | 7702(1)  | 60(1)  |
| C(1)  | 1204(1) | 2166(1) | 3695(1)  | 63(1)  |
| C(2)  | 1788(1) | 2778(1) | 3710(1)  | 57(1)  |
| C(3)  | 1805(1) | 3310(1) | 4501(1)  | 49(1)  |
| C(4)  | 1234(1) | 3224(1) | 5263(1)  | 45(1)  |
| C(5)  | 1240(1) | 3775(1) | 6116(1)  | 44(1)  |
| C(6)  | 1260(1) | 3663(1) | 7175(1)  | 51(1)  |
| C(7)  | 1323(1) | 2953(1) | 7717(1)  | 55(1)  |
| C(8)  | 1374(1) | 2368(1) | 8194(1)  | 56(1)  |
| C(9)  | 1410(1) | 1668(1) | 8769(1)  | 54(1)  |
| C(10) | 1247(2) | 977(1)  | 8268(2)  | 83(1)  |
| C(11) | 1269(2) | 304(1)  | 8846(3)  | 102(1) |
| C(12) | 1443(2) | 350(1)  | 9902(2)  | 87(1)  |

|       |         |         |          |       |
|-------|---------|---------|----------|-------|
| C(13) | 660(1)  | 2587(1) | 5220(1)  | 56(1) |
| C(14) | 644(1)  | 2050(1) | 4437(2)  | 67(1) |
| C(15) | 1135(1) | 5016(1) | 5116(1)  | 47(1) |
| C(16) | 1073(1) | 5776(1) | 5215(1)  | 52(1) |
| C(17) | 1060(1) | 6113(1) | 6195(1)  | 61(1) |
| C(18) | 1114(2) | 5669(1) | 7059(1)  | 64(1) |
| C(19) | 1190(1) | 4875(1) | 6976(1)  | 52(1) |
| C(20) | 1623(2) | 1008(1) | 10419(2) | 74(1) |
| C(21) | 1610(1) | 1675(1) | 9854(1)  | 60(1) |

---

**Table S15.** Bond lengths [Å] and angles [°] for 170613LT\_0M.

|             |            |
|-------------|------------|
| F(1)-C(12)  | 1.365(2)   |
| F(2)-C(1)   | 1.361(2)   |
| N(1)-C(15)  | 1.3815(19) |
| N(1)-C(5)   | 1.383(2)   |
| N(1)-C(19)  | 1.3962(19) |
| N(2)-C(19)  | 1.324(2)   |
| N(2)-C(6)   | 1.373(2)   |
| C(1)-C(2)   | 1.362(3)   |
| C(1)-C(14)  | 1.368(3)   |
| C(2)-C(3)   | 1.385(2)   |
| C(2)-H(12)  | 0.9500     |
| C(3)-C(4)   | 1.393(2)   |
| C(3)-H(11)  | 0.9500     |
| C(4)-C(13)  | 1.388(2)   |
| C(4)-C(5)   | 1.468(2)   |
| C(5)-C(6)   | 1.384(2)   |
| C(6)-C(7)   | 1.426(2)   |
| C(7)-C(8)   | 1.194(2)   |
| C(8)-C(9)   | 1.432(2)   |
| C(9)-C(10)  | 1.377(3)   |
| C(9)-C(21)  | 1.392(3)   |
| C(10)-C(11) | 1.396(3)   |

|                  |            |
|------------------|------------|
| C(10)-H(9)       | 0.9500     |
| C(11)-C(12)      | 1.356(4)   |
| C(11)-H(8)       | 0.9500     |
| C(12)-C(20)      | 1.339(3)   |
| C(13)-C(14)      | 1.383(2)   |
| C(13)-H(2)       | 0.9500     |
| C(14)-H(1)       | 0.9500     |
| C(15)-C(16)      | 1.343(2)   |
| C(15)-H(3)       | 0.9500     |
| C(16)-C(17)      | 1.406(2)   |
| C(16)-H(4)       | 0.9500     |
| C(17)-C(18)      | 1.357(3)   |
| C(17)-H(5)       | 0.9500     |
| C(18)-C(19)      | 1.401(3)   |
| C(18)-H(10)      | 0.9500     |
| C(20)-C(21)      | 1.378(3)   |
| C(20)-H(7)       | 0.9500     |
| C(21)-H(6)       | 0.9500     |
|                  |            |
| C(15)-N(1)-C(5)  | 132.06(13) |
| C(15)-N(1)-C(19) | 120.78(14) |
| C(5)-N(1)-C(19)  | 107.09(12) |
| C(19)-N(2)-C(6)  | 105.09(13) |
| F(2)-C(1)-C(2)   | 118.57(18) |
| F(2)-C(1)-C(14)  | 118.59(19) |
| C(2)-C(1)-C(14)  | 122.84(17) |
| C(1)-C(2)-C(3)   | 118.58(16) |
| C(1)-C(2)-H(12)  | 120.7      |
| C(3)-C(2)-H(12)  | 120.7      |
| C(2)-C(3)-C(4)   | 120.72(17) |
| C(2)-C(3)-H(11)  | 119.6      |
| C(4)-C(3)-H(11)  | 119.6      |
| C(13)-C(4)-C(3)  | 118.44(15) |
| C(13)-C(4)-C(5)  | 119.44(14) |
| C(3)-C(4)-C(5)   | 122.11(15) |
| N(1)-C(5)-C(6)   | 104.54(14) |

|                   |            |
|-------------------|------------|
| N(1)-C(5)-C(4)    | 124.70(13) |
| C(6)-C(5)-C(4)    | 130.74(15) |
| N(2)-C(6)-C(5)    | 111.99(15) |
| N(2)-C(6)-C(7)    | 120.89(14) |
| C(5)-C(6)-C(7)    | 127.09(16) |
| C(8)-C(7)-C(6)    | 178.30(18) |
| C(7)-C(8)-C(9)    | 178.48(19) |
| C(10)-C(9)-C(21)  | 118.49(18) |
| C(10)-C(9)-C(8)   | 121.23(18) |
| C(21)-C(9)-C(8)   | 120.28(17) |
| C(9)-C(10)-C(11)  | 120.2(2)   |
| C(9)-C(10)-H(9)   | 119.9      |
| C(11)-C(10)-H(9)  | 119.9      |
| C(12)-C(11)-C(10) | 118.5(2)   |
| C(12)-C(11)-H(8)  | 120.7      |
| C(10)-C(11)-H(8)  | 120.7      |
| C(20)-C(12)-C(11) | 123.2(2)   |
| C(20)-C(12)-F(1)  | 119.3(3)   |
| C(11)-C(12)-F(1)  | 117.6(3)   |
| C(14)-C(13)-C(4)  | 121.18(16) |
| C(14)-C(13)-H(2)  | 119.4      |
| C(4)-C(13)-H(2)   | 119.4      |
| C(1)-C(14)-C(13)  | 118.23(18) |
| C(1)-C(14)-H(1)   | 120.9      |
| C(13)-C(14)-H(1)  | 120.9      |
| C(16)-C(15)-N(1)  | 119.73(14) |
| C(16)-C(15)-H(3)  | 120.1      |
| N(1)-C(15)-H(3)   | 120.1      |
| C(15)-C(16)-C(17) | 120.88(15) |
| C(15)-C(16)-H(4)  | 119.6      |
| C(17)-C(16)-H(4)  | 119.6      |
| C(18)-C(17)-C(16) | 119.97(18) |
| C(18)-C(17)-H(5)  | 120.0      |
| C(16)-C(17)-H(5)  | 120.0      |
| C(17)-C(18)-C(19) | 120.09(16) |
| C(17)-C(18)-H(10) | 120.0      |

|                   |            |
|-------------------|------------|
| C(19)-C(18)-H(10) | 120.0      |
| N(2)-C(19)-N(1)   | 111.27(15) |
| N(2)-C(19)-C(18)  | 130.17(15) |
| N(1)-C(19)-C(18)  | 118.54(15) |
| C(12)-C(20)-C(21) | 118.7(2)   |
| C(12)-C(20)-H(7)  | 120.7      |
| C(21)-C(20)-H(7)  | 120.7      |
| C(20)-C(21)-C(9)  | 120.9(2)   |
| C(20)-C(21)-H(6)  | 119.5      |
| C(9)-C(21)-H(6)   | 119.5      |

---

Symmetry transformations used to generate equivalent atoms:

**Table S16.** Anisotropic displacement parameters ( $\text{\AA}^2 \times 10^3$ ) for 170613LT\_0M. The anisotropic displacement factor exponent takes the form:  $-2p^2 [ h^2 a^*2U^{11} + \dots + 2 h k a^* b^* U^{12} ]$

|       | U11    | U22   | U33    | U23    | U13   | U12   |
|-------|--------|-------|--------|--------|-------|-------|
| F(1)  | 158(2) | 70(1) | 191(2) | 65(1)  | 42(1) | 19(1) |
| F(2)  | 123(1) | 85(1) | 84(1)  | -38(1) | 22(1) | 13(1) |
| N(1)  | 49(1)  | 49(1) | 33(1)  | 2(1)   | 7(1)  | -2(1) |
| N(2)  | 85(1)  | 61(1) | 34(1)  | 2(1)   | 12(1) | -1(1) |
| C(1)  | 73(1)  | 59(1) | 55(1)  | -12(1) | 6(1)  | 16(1) |
| C(2)  | 69(1)  | 61(1) | 46(1)  | 7(1)   | 18(1) | 20(1) |
| C(3)  | 55(1)  | 52(1) | 42(1)  | 8(1)   | 13(1) | 7(1)  |
| C(4)  | 46(1)  | 50(1) | 38(1)  | 4(1)   | 7(1)  | 6(1)  |
| C(5)  | 48(1)  | 50(1) | 37(1)  | 4(1)   | 8(1)  | 1(1)  |
| C(6)  | 60(1)  | 58(1) | 37(1)  | 6(1)   | 11(1) | 1(1)  |
| C(7)  | 64(1)  | 62(1) | 40(1)  | 5(1)   | 14(1) | 3(1)  |
| C(8)  | 64(1)  | 60(1) | 46(1)  | 6(1)   | 18(1) | 6(1)  |
| C(9)  | 55(1)  | 51(1) | 60(1)  | 6(1)   | 17(1) | 8(1)  |
| C(10) | 102(2) | 67(2) | 79(1)  | -5(1)  | 12(1) | -2(1) |
| C(11) | 120(2) | 48(1) | 139(3) | -6(2)  | 26(2) | -4(1) |
| C(12) | 88(2)  | 59(2) | 117(2) | 31(1)  | 25(2) | 16(1) |



|       |       |       |       |        |       |       |
|-------|-------|-------|-------|--------|-------|-------|
| C(13) | 55(1) | 57(1) | 58(1) | -3(1)  | 17(1) | -2(1) |
| C(14) | 64(1) | 58(1) | 80(1) | -14(1) | 13(1) | -3(1) |
| C(15) | 53(1) | 56(1) | 33(1) | 3(1)   | 9(1)  | 0(1)  |
| C(16) | 58(1) | 54(1) | 44(1) | 7(1)   | 10(1) | -3(1) |
| C(17) | 80(1) | 50(1) | 52(1) | 0(1)   | 10(1) | -6(1) |
| C(18) | 91(2) | 58(1) | 41(1) | -8(1)  | 11(1) | -8(1) |
| C(19) | 65(1) | 58(1) | 32(1) | -2(1)  | 7(1)  | -5(1) |
| C(20) | 74(1) | 74(2) | 76(1) | 27(1)  | 20(1) | 19(1) |
| C(21) | 67(1) | 56(1) | 60(1) | 12(1)  | 19(1) | 9(1)  |

**Table S17.** Hydrogen coordinates ( $\times 10^4$ ) and isotropic displacement parameters ( $\text{\AA}^2 \times 10^{-3}$ ) for 170613LT\_0M.

---

|       |      |      |       |     |
|-------|------|------|-------|-----|
| H(12) | 2175 | 2838 | 3188  | 69  |
| H(11) | 2210 | 3739 | 4524  | 59  |
| H(9)  | 1120 | 959  | 7527  | 100 |
| H(8)  | 1164 | -176 | 8506  | 122 |
| H(2)  | 271  | 2518 | 5738  | 67  |
| H(1)  | 254  | 1612 | 4414  | 81  |
| H(3)  | 1133 | 4795 | 4448  | 56  |
| H(4)  | 1038 | 6091 | 4613  | 62  |
| H(5)  | 1014 | 6651 | 6253  | 73  |
| H(10) | 1099 | 5896 | 7721  | 76  |
| H(7)  | 1758 | 1015 | 11160 | 89  |
| H(6)  | 1739 | 2145 | 10211 | 72  |

---

**Figure S7.** ORTEP diagram of compound **20** (CCDC No. 2303798)

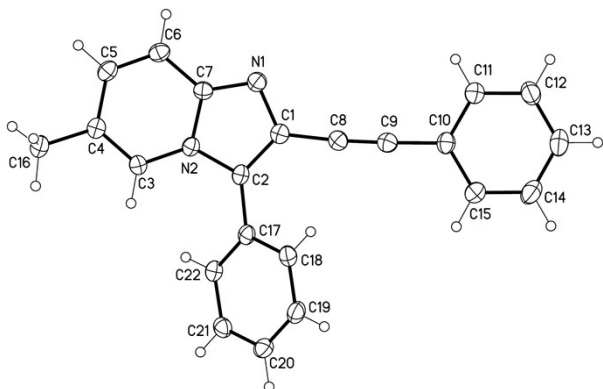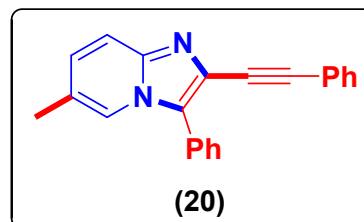

**230756L3\_twin1\_hklf4**

**Table S18** Crystal data and structure refinement for 230756L3\_twin1\_hklf4.

|                     |                                                |
|---------------------|------------------------------------------------|
| Identification code | 230756L3_twin1_hklf4                           |
| Empirical formula   | C <sub>44</sub> H <sub>32</sub> N <sub>4</sub> |
| Formula weight      | 616.73                                         |
| Temperature/K       | 100.00(11)                                     |
| Crystal system      | monoclinic                                     |
| Space group         | P2 <sub>1</sub> /c                             |
| a/Å                 | 16.7695(5)                                     |
| b/Å                 | 8.6997(3)                                      |
| c/Å                 | 11.0836(3)                                     |
| $\alpha$ /°         | 90                                             |
| $\beta$ /°          | 91.718(3)                                      |
| $\gamma$ /°         | 90                                             |

|                                             |                                                           |
|---------------------------------------------|-----------------------------------------------------------|
| Volume/Å <sup>3</sup>                       | 1616.26(8)                                                |
| Z                                           | 2                                                         |
| $\rho_{\text{calc}}/\text{cm}^3$            | 1.267                                                     |
| $\mu/\text{mm}^{-1}$                        | 0.578                                                     |
| F(000)                                      | 648.0                                                     |
| Crystal size/mm <sup>3</sup>                | 0.03 × 0.03 × 0.01                                        |
| Radiation                                   | Cu K $\alpha$ ( $\lambda$ = 1.54184)                      |
| 2 $\Theta$ range for data collection/°      | 5.272 to 148.92                                           |
| Index ranges                                | -20 ≤ h ≤ 20, -10 ≤ k ≤ 10, -13 ≤ l ≤ 13                  |
| Reflections collected                       | 3602                                                      |
| Independent reflections                     | 3602 [ $R_{\text{int}}$ = ?, $R_{\text{sigma}}$ = 0.0160] |
| Data/restraints/parameters                  | 3602/0/219                                                |
| Goodness-of-fit on F <sup>2</sup>           | 1.062                                                     |
| Final R indexes [ $I \geq 2\sigma(I)$ ]     | $R_1 = 0.0341$ , $wR_2 = 0.0835$                          |
| Final R indexes [all data]                  | $R_1 = 0.0440$ , $wR_2 = 0.0877$                          |
| Largest diff. peak/hole / e Å <sup>-3</sup> | 0.16/-0.22                                                |

**Table S19 Fractional Atomic Coordinates ( $\times 10^4$ ) and Equivalent Isotropic Displacement Parameters ( $\text{\AA}^2 \times 10^3$ ) for 230756L3\_twin1\_hklf4.  $U_{\text{eq}}$  is defined as 1/3 of the trace of the orthogonalised  $U_{\text{ij}}$  tensor.**

| Atom | x         | y          | z          | U(eq)   |
|------|-----------|------------|------------|---------|
| C1   | 6648.1(8) | 3683.4(16) | 221.5(13)  | 21.2(3) |
| C2   | 6498.8(8) | 4354.9(16) | 1325.6(13) | 20.2(3) |
| C3   | 5190.2(8) | 4610.5(16) | 2373.4(12) | 20.8(3) |
| C4   | 4396.4(8) | 4306.4(16) | 2279.1(13) | 21.5(3) |
| C5   | 4097.4(9) | 3419.5(16) | 1281.2(13) | 23.1(3) |

**Table S19 Fractional Atomic Coordinates ( $\times 10^4$ ) and Equivalent Isotropic Displacement Parameters ( $\text{\AA}^2 \times 10^3$ ) for 230756L3\_twin1\_hklf4.  $U_{eq}$  is defined as 1/3 of the trace of the orthogonalised  $U_{ij}$  tensor.**

| Atom | $x$        | $y$        | $z$         | $U(eq)$ |
|------|------------|------------|-------------|---------|
| C6   | 4583.5(8)  | 2923.9(16) | 405.5(13)   | 23.2(3) |
| C7   | 5406.4(8)  | 3284.2(16) | 479.4(12)   | 20.6(3) |
| C8   | 7377.2(9)  | 3718.1(16) | -408.6(13)  | 22.3(3) |
| C9   | 7953.4(9)  | 3784.5(17) | -1024.2(13) | 23.4(3) |
| C10  | 8610.2(8)  | 3921.2(17) | -1816.3(13) | 23.1(3) |
| C11  | 8525.1(9)  | 3415.6(18) | -3013.9(14) | 26.7(3) |
| C12  | 9139.8(9)  | 3623.3(19) | -3801.3(15) | 31.0(4) |
| C13  | 9845.7(10) | 4314(2)    | -3408.9(15) | 33.3(4) |
| C14  | 9938.2(10) | 4804(2)    | -2224.2(15) | 33.9(4) |
| C15  | 9326.6(9)  | 4610.5(19) | -1430.1(15) | 29.1(4) |
| C16  | 3825.2(9)  | 4963.5(18) | 3163.9(14)  | 26.1(3) |
| C17  | 7029.7(8)  | 5205.9(16) | 2165.3(13)  | 20.4(3) |
| C18  | 7550.7(8)  | 6305.1(17) | 1702.9(13)  | 23.2(3) |
| C19  | 8079.8(9)  | 7089.0(18) | 2465.3(14)  | 26.8(3) |
| C20  | 8098.3(9)  | 6785.0(18) | 3693.5(14)  | 27.1(3) |
| C21  | 7587.6(8)  | 5695.4(18) | 4159.0(13)  | 24.4(3) |
| C22  | 7052.9(8)  | 4908.8(16) | 3402.9(13)  | 21.7(3) |
| N1   | 5978.0(7)  | 3005.8(13) | -295.3(11)  | 22.5(3) |
| N2   | 5692.3(7)  | 4094.9(13) | 1491.8(10)  | 19.8(3) |

**Table S20 Anisotropic Displacement Parameters ( $\text{\AA}^2 \times 10^3$ ) for 230756L3\_twin1\_hklf4. The Anisotropic displacement factor exponent takes the form:  $-2\pi^2[h^2a^*2U_{11}+2hka^*b^*U_{12}+\dots]$ .**

| Atom | $U_{11}$ | $U_{22}$ | $U_{33}$ | $U_{23}$ | $U_{13}$ | $U_{12}$ |
|------|----------|----------|----------|----------|----------|----------|
|------|----------|----------|----------|----------|----------|----------|

**Table S20 Anisotropic Displacement Parameters ( $\text{\AA}^2 \times 10^3$ ) for 230756L3\_twin1\_hklf4. The Anisotropic displacement factor exponent takes the form:  $-2\pi^2[h^2a^*^2U_{11}+2hka^*b^*U_{12}+\dots]$ .**

| Atom | $U_{11}$ | $U_{22}$ | $U_{33}$ | $U_{23}$ | $U_{13}$ | $U_{12}$ |
|------|----------|----------|----------|----------|----------|----------|
| C1   | 21.2(7)  | 19.2(7)  | 23.3(7)  | 1.2(5)   | 1.0(6)   | 1.6(5)   |
| C2   | 17.8(7)  | 19.7(7)  | 23.3(7)  | 2.0(6)   | 3.0(6)   | 1.3(5)   |
| C3   | 21.1(7)  | 20.8(7)  | 20.6(7)  | -0.2(6)  | 2.7(6)   | 0.9(5)   |
| C4   | 20.9(7)  | 19.4(7)  | 24.4(7)  | 2.8(6)   | 1.7(6)   | 1.3(6)   |
| C5   | 20.4(7)  | 19.0(7)  | 29.9(8)  | 2.1(6)   | 0.2(6)   | -1.0(6)  |
| C6   | 23.5(8)  | 18.8(7)  | 27.1(7)  | -0.6(6)  | -2.0(6)  | -1.4(6)  |
| C7   | 22.2(7)  | 18.2(7)  | 21.4(7)  | -0.6(5)  | -0.3(6)  | 0.3(5)   |
| C8   | 23.6(8)  | 20.5(8)  | 22.8(7)  | -0.2(6)  | 0.7(6)   | 2.1(6)   |
| C9   | 23.8(8)  | 22.8(8)  | 23.5(7)  | -0.2(6)  | -1.0(6)  | 2.0(6)   |
| C10  | 20.8(7)  | 23.0(8)  | 25.6(8)  | 2.6(6)   | 2.7(6)   | 3.5(6)   |
| C11  | 23.7(8)  | 28.8(8)  | 27.6(8)  | -1.6(6)  | 2.3(6)   | 0.3(6)   |
| C12  | 30.8(9)  | 37.5(10) | 24.9(8)  | -1.2(7)  | 5.4(7)   | 3.0(7)   |
| C13  | 25.8(9)  | 40.2(10) | 34.4(9)  | 6.8(7)   | 9.2(7)   | 3.1(7)   |
| C14  | 20.5(8)  | 41.2(10) | 40.0(10) | 2.3(8)   | 0.7(7)   | -2.4(7)  |
| C15  | 22.5(8)  | 35.7(9)  | 29.2(8)  | -1.7(7)  | -0.7(6)  | 0.2(6)   |
| C16  | 21.3(8)  | 26.8(8)  | 30.6(9)  | 0.1(6)   | 4.4(6)   | 0.3(6)   |
| C17  | 17.2(7)  | 19.5(7)  | 24.8(7)  | -0.8(6)  | 2.7(6)   | 3.3(5)   |
| C18  | 24.1(8)  | 23.4(8)  | 22.5(7)  | 0.1(6)   | 5.1(6)   | -0.1(6)  |
| C19  | 21.8(8)  | 25.8(8)  | 33.2(8)  | -1.6(6)  | 6.6(6)   | -4.1(6)  |
| C20  | 19.3(7)  | 31.2(9)  | 30.7(8)  | -6.7(6)  | 0.0(6)   | 0.5(6)   |
| C21  | 22.0(7)  | 29.9(8)  | 21.4(7)  | -1.3(6)  | 1.2(6)   | 5.3(6)   |
| C22  | 19.2(7)  | 21.3(8)  | 24.8(7)  | 1.7(6)   | 3.4(6)   | 1.3(6)   |
| N1   | 22.3(6)  | 20.7(6)  | 24.6(6)  | -1.2(5)  | 1.3(5)   | 0.5(5)   |

**Table S20 Anisotropic Displacement Parameters ( $\text{\AA}^2 \times 10^3$ ) for 230756L3\_twin1\_hklf4. The Anisotropic displacement factor exponent takes the form:  $-2\pi^2[h^2a^{*2}U_{11}+2hka^*b^*U_{12}+\dots]$ .**

| Atom | $U_{11}$ | $U_{22}$ | $U_{33}$ | $U_{23}$ | $U_{13}$ | $U_{12}$ |
|------|----------|----------|----------|----------|----------|----------|
| N2   | 18.1(6)  | 18.5(6)  | 22.7(6)  | 0.6(5)   | 1.8(5)   | 0.3(5)   |

**Table S21 Bond Lengths for 230756L3\_twin1\_hklf4.**

| Atom | Atom | Length/ $\text{\AA}$ | Atom | Atom | Length/ $\text{\AA}$ |
|------|------|----------------------|------|------|----------------------|
| C1   | C2   | 1.386(2)             | C9   | C10  | 1.434(2)             |
| C1   | C8   | 1.427(2)             | C10  | C11  | 1.402(2)             |
| C1   | N1   | 1.3782(18)           | C10  | C15  | 1.398(2)             |
| C2   | C17  | 1.469(2)             | C11  | C12  | 1.382(2)             |
| C2   | N2   | 1.3890(17)           | C12  | C13  | 1.386(2)             |
| C3   | C4   | 1.358(2)             | C13  | C14  | 1.385(2)             |
| C3   | N2   | 1.3835(17)           | C14  | C15  | 1.382(2)             |
| C4   | C5   | 1.427(2)             | C17  | C18  | 1.403(2)             |
| C4   | C16  | 1.504(2)             | C17  | C22  | 1.395(2)             |
| C5   | C6   | 1.356(2)             | C18  | C19  | 1.386(2)             |
| C6   | C7   | 1.415(2)             | C19  | C20  | 1.386(2)             |
| C7   | N1   | 1.3281(18)           | C20  | C21  | 1.387(2)             |
| C7   | N2   | 1.3979(18)           | C21  | C22  | 1.389(2)             |
| C8   | C9   | 1.201(2)             |      |      |                      |

**Table S22 Bond Angles for 230756L3\_twin1\_hklf4.**

| Atom | Atom | Atom | Angle/ $^\circ$ | Atom | Atom | Atom | Angle/ $^\circ$ |
|------|------|------|-----------------|------|------|------|-----------------|
| C2   | C1   | C8   | 127.13(14)      | C15  | C10  | C11  | 119.11(14)      |

**Table S22 Bond Angles for 230756L3\_twin1\_hklf4.**

| Atom | Atom | Atom | Angle/°    | Atom | Atom | Atom | Angle/°    |
|------|------|------|------------|------|------|------|------------|
| N1   | C1   | C2   | 112.38(12) | C12  | C11  | C10  | 120.02(15) |
| N1   | C1   | C8   | 120.38(13) | C11  | C12  | C13  | 120.31(15) |
| C1   | C2   | C17  | 130.55(13) | C14  | C13  | C12  | 120.09(15) |
| C1   | C2   | N2   | 104.53(12) | C15  | C14  | C13  | 120.16(15) |
| N2   | C2   | C17  | 124.90(12) | C14  | C15  | C10  | 120.30(15) |
| C4   | C3   | N2   | 119.89(13) | C18  | C17  | C2   | 118.98(13) |
| C3   | C4   | C5   | 119.06(13) | C22  | C17  | C2   | 121.88(13) |
| C3   | C4   | C16  | 121.18(13) | C22  | C17  | C18  | 119.09(13) |
| C5   | C4   | C16  | 119.66(13) | C19  | C18  | C17  | 120.46(14) |
| C6   | C5   | C4   | 121.44(13) | C20  | C19  | C18  | 119.99(14) |
| C5   | C6   | C7   | 119.61(14) | C19  | C20  | C21  | 119.98(14) |
| N1   | C7   | C6   | 130.07(13) | C20  | C21  | C22  | 120.45(14) |
| N1   | C7   | N2   | 111.97(12) | C21  | C22  | C17  | 120.03(13) |
| N2   | C7   | C6   | 117.94(12) | C7   | N1   | C1   | 104.39(11) |
| C9   | C8   | C1   | 174.44(16) | C2   | N2   | C7   | 106.71(11) |
| C8   | C9   | C10  | 176.21(16) | C3   | N2   | C2   | 131.03(12) |
| C11  | C10  | C9   | 119.71(14) | C3   | N2   | C7   | 121.95(12) |
| C15  | C10  | C9   | 121.12(14) |      |      |      |            |

**Table S23 Torsion Angles for 230756L3\_twin1\_hklf4.**

| A  | B  | C   | D   | Angle/°     | A   | B   | C   | D   | Angle/° |
|----|----|-----|-----|-------------|-----|-----|-----|-----|---------|
| C1 | C2 | C17 | C18 | 43.6(2)     | C11 | C12 | C13 | C14 | -0.2(3) |
| C1 | C2 | C17 | C22 | -133.77(16) | C12 | C13 | C14 | C15 | -0.2(3) |

**Table S23 Torsion Angles for 230756L3\_twin1\_hklf4.**

| A   | B   | C   | D   | Angle/°     | A   | B   | C   | D   | Angle/°     |
|-----|-----|-----|-----|-------------|-----|-----|-----|-----|-------------|
| C1  | C2  | N2  | C3  | -173.56(13) | C13 | C14 | C15 | C10 | -0.1(3)     |
| C1  | C2  | N2  | C7  | 0.01(14)    | C15 | C10 | C11 | C12 | -1.0(2)     |
| C2  | C1  | N1  | C7  | 1.21(16)    | C16 | C4  | C5  | C6  | 174.01(14)  |
| C2  | C17 | C18 | C19 | -177.66(13) | C17 | C2  | N2  | C3  | 4.9(2)      |
| C2  | C17 | C22 | C21 | 177.31(13)  | C17 | C2  | N2  | C7  | 178.46(13)  |
| C3  | C4  | C5  | C6  | -2.4(2)     | C17 | C18 | C19 | C20 | 0.2(2)      |
| C4  | C3  | N2  | C2  | 173.99(13)  | C18 | C17 | C22 | C21 | -0.1(2)     |
| C4  | C3  | N2  | C7  | 1.2(2)      | C18 | C19 | C20 | C21 | 0.0(2)      |
| C4  | C5  | C6  | C7  | 0.3(2)      | C19 | C20 | C21 | C22 | -0.3(2)     |
| C5  | C6  | C7  | N1  | -175.54(14) | C20 | C21 | C22 | C17 | 0.3(2)      |
| C5  | C6  | C7  | N2  | 2.5(2)      | C22 | C17 | C18 | C19 | -0.2(2)     |
| C6  | C7  | N1  | C1  | 176.98(15)  | N1  | C1  | C2  | C17 | -179.08(14) |
| C6  | C7  | N2  | C2  | -177.65(13) | N1  | C1  | C2  | N2  | -0.76(16)   |
| C6  | C7  | N2  | C3  | -3.36(19)   | N1  | C7  | N2  | C2  | 0.77(16)    |
| C8  | C1  | C2  | C17 | -2.9(3)     | N1  | C7  | N2  | C3  | 175.06(12)  |
| C8  | C1  | C2  | N2  | 175.40(14)  | N2  | C2  | C17 | C18 | -134.40(14) |
| C8  | C1  | N1  | C7  | -175.24(13) | N2  | C2  | C17 | C22 | 48.2(2)     |
| C9  | C10 | C11 | C12 | 176.33(14)  | N2  | C3  | C4  | C5  | 1.6(2)      |
| C9  | C10 | C15 | C14 | -176.63(15) | N2  | C3  | C4  | C16 | -174.73(12) |
| C10 | C11 | C12 | C13 | 0.8(2)      | N2  | C7  | N1  | C1  | -1.19(15)   |
| C11 | C10 | C15 | C14 | 0.7(2)      |     |     |     |     |             |

**Table S24 Hydrogen Atom Coordinates ( $\text{\AA} \times 10^4$ ) and Isotropic Displacement Parameters ( $\text{\AA}^2 \times 10^3$ ) for 230756L3\_twin1\_hklf4.**



| Atom | <i>x</i> | <i>y</i> | <i>z</i> | U(eq) |
|------|----------|----------|----------|-------|
| H3   | 5400.3   | 5176.36  | 3043.51  | 25    |
| H5   | 3545.84  | 3170.9   | 1229.04  | 28    |
| H6   | 4372.73  | 2338.35  | -253.49  | 28    |
| H11  | 8044.87  | 2930.12  | -3284.66 | 32    |
| H12  | 9078.05  | 3291.03  | -4615.21 | 37    |
| H13  | 10266.78 | 4451.17  | -3953.41 | 40    |
| H14  | 10423.29 | 5274.37  | -1956.86 | 41    |
| H15  | 9393.17  | 4947.31  | -617.94  | 35    |
| H16A | 3550.18  | 5851.77  | 2801.16  | 39    |
| H16B | 4120.8   | 5287.39  | 3896.55  | 39    |
| H16C | 3432.5   | 4179.47  | 3370.39  | 39    |
| H18  | 7540.81  | 6513.8   | 861.24   | 28    |
| H19  | 8429.73  | 7834.49  | 2146.16  | 32    |
| H20  | 8460.61  | 7322.53  | 4216.28  | 32    |
| H21  | 7603.66  | 5485.84  | 5000.56  | 29    |
| H22  | 6702.94  | 4168.26  | 3728.54  | 26    |

## Experimental

Single crystals of C<sub>44</sub>H<sub>32</sub>N<sub>4</sub> [230756L3\_twin1\_hklf4] were [1]. A suitable crystal was selected and [2] on a XtaLAB Synergy R, DW system, HyPix-Arc 150 diffractometer. The crystal was kept at 100.00(11) K during data collection. Using Olex2 [1], the structure was solved with the SHELXD [2] structure solution program using Dual Space and refined with the SHELXL [3] refinement package using Least Squares minimisation.

1. Dolomanov, O.V., Bourhis, L.J., Gildea, R.J., Howard, J.A.K. & Puschmann, H. (2009), *J. Appl. Cryst.* 42, 339-341.
2. Sheldrick, G.M. (2008). *Acta Cryst.* A64, 112-122.
3. Sheldrick, G.M. (2015). *Acta Cryst.* C71, 3-8.

## Crystal structure determination of [230756L3\_twin1\_hklf4]

**Crystal Data** for C<sub>44</sub>H<sub>32</sub>N<sub>4</sub> (*M* = 616.73 g/mol): monoclinic, space group P2<sub>1</sub>/c (no. 14), *a* = 16.7695(5) Å, *b* = 8.6997(3) Å, *c* = 11.0836(3) Å, β = 91.718(3)°, *V* = 1616.26(8) Å<sup>3</sup>, *Z* = 2, *T* = 100.00(11) K, μ(Cu Kα) = 0.578 mm<sup>-1</sup>, *D*<sub>calc</sub> = 1.267 g/cm<sup>3</sup>, 3602 reflections measured (5.272°

$\leq 2\Theta \leq 148.92^\circ$ ), 3602 unique ( $R_{\text{int}} = ?$ ,  $R_{\text{sigma}} = 0.0160$ ) which were used in all calculations. The final  $R_1$  was 0.0341 ( $I > 2\sigma(I)$ ) and  $wR_2$  was 0.0877 (all data).

### Refinement model description

Number of restraints - 0, number of constraints - unknown.

Details:

1. Twinned data refinement

Scales: 0.5422(12)

0.4578(12)

2. Fixed Uiso

At 1.2 times of:

All C(H) groups

At 1.5 times of:

All C(H,H,H) groups

3.a Aromatic/amide H refined with riding coordinates:

C3(H3), C5(H5), C6(H6), C11(H11), C12(H12), C13(H13), C14(H14), C15(H15),

C18(H18), C19(H19), C20(H20), C21(H21), C22(H22)

3.b Idealised Me refined as rotating group:

C16(H16A,H16B,H16C)

This report has been created with Olex2, compiled on 2023.08.24 svn.re1ec1418 for OlexSys.  
Please [let us know](#) if there are any errors or if you would like to have additional features.

**Figure S8.** ORTEP diagram of compound **27** (CCDC No. 2295775)

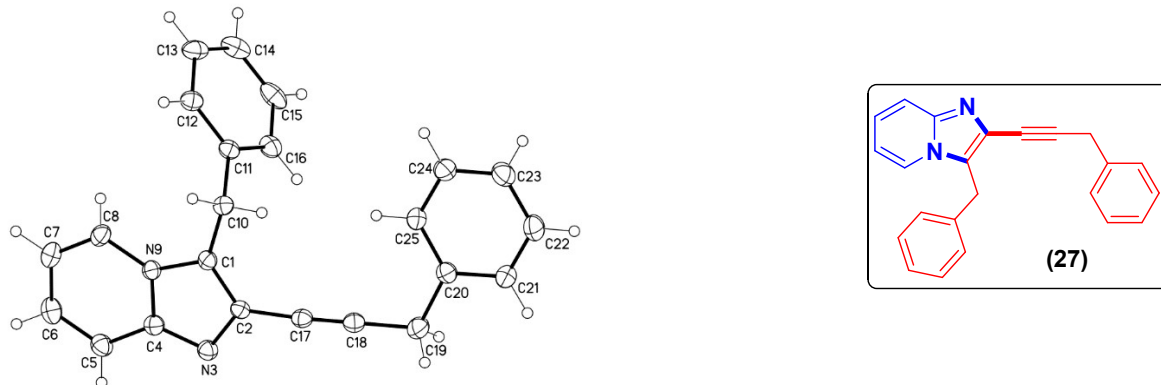

**Table S25 Crystal data and structure refinement for 230885lt\_auto.**

|                                             |                                                               |
|---------------------------------------------|---------------------------------------------------------------|
| Identification code                         | 230885lt_auto                                                 |
| Empirical formula                           | C <sub>46</sub> H <sub>36</sub> N <sub>4</sub>                |
| Formula weight                              | 644.79                                                        |
| Temperature/K                               | 99.8(5)                                                       |
| Crystal system                              | orthorhombic                                                  |
| Space group                                 | P2 <sub>1</sub> 2 <sub>1</sub> 2 <sub>1</sub>                 |
| a/Å                                         | 7.92700(10)                                                   |
| b/Å                                         | 11.98670(10)                                                  |
| c/Å                                         | 36.2753(4)                                                    |
| α/°                                         | 90                                                            |
| β/°                                         | 90                                                            |
| γ/°                                         | 90                                                            |
| Volume/Å <sup>3</sup>                       | 3446.83(6)                                                    |
| Z                                           | 4                                                             |
| ρ <sub>calc</sub> /cm <sup>3</sup>          | 1.243                                                         |
| μ/mm <sup>-1</sup>                          | 0.563                                                         |
| F(000)                                      | 1360.0                                                        |
| Crystal size/mm <sup>3</sup>                | 0.06 × 0.05 × 0.05                                            |
| Radiation                                   | Cu Kα (λ = 1.54184)                                           |
| 2θ range for data collection/°              | 4.872 to 149.538                                              |
| Index ranges                                | -9 ≤ h ≤ 9, -14 ≤ k ≤ 13, -44 ≤ l ≤ 40                        |
| Reflections collected                       | 21562                                                         |
| Independent reflections                     | 6582 [R <sub>int</sub> = 0.0303, R <sub>sigma</sub> = 0.0311] |
| Data/restraints/parameters                  | 6582/0/453                                                    |
| Goodness-of-fit on F <sup>2</sup>           | 1.045                                                         |
| Final R indexes [I ≥ 2σ (I)]                | R <sub>1</sub> = 0.0330, wR <sub>2</sub> = 0.0805             |
| Final R indexes [all data]                  | R <sub>1</sub> = 0.0370, wR <sub>2</sub> = 0.0830             |
| Largest diff. peak/hole / e Å <sup>-3</sup> | 0.16/-0.16                                                    |

Flack parameter

0.0(5)

**Table S26 Fractional Atomic Coordinates ( $\times 10^4$ ) and Equivalent Isotropic Displacement Parameters ( $\text{\AA}^2 \times 10^3$ ) for 230885lt\_auto.  $U_{\text{eq}}$  is defined as 1/3 of the trace of the orthogonalised  $U_{\text{IJ}}$  tensor.**

| Atom | <i>x</i>    | <i>y</i>    | <i>z</i>   | $U(\text{eq})$ |
|------|-------------|-------------|------------|----------------|
| C1   | 6301 (2)    | 6869.8 (16) | 6628.9 (5) | 18.8 (4)       |
| C2   | 6931 (2)    | 5847.8 (16) | 6530.3 (5) | 18.9 (4)       |
| C4   | 6893 (2)    | 5811.8 (17) | 7119.8 (5) | 20.9 (4)       |
| C5   | 6988 (3)    | 5586.1 (19) | 7503.3 (5) | 25.7 (5)       |
| C6   | 6476 (3)    | 6380.1 (19) | 7747.3 (5) | 28.9 (5)       |
| C7   | 5855 (3)    | 7429.6 (18) | 7623.1 (6) | 27.2 (5)       |
| C8   | 5769 (2)    | 7657.5 (17) | 7258.1 (5) | 23.5 (4)       |
| C10  | 5711 (2)    | 7835.6 (16) | 6404.0 (5) | 19.2 (4)       |
| C11  | 3810 (2)    | 7987.7 (16) | 6405.5 (5) | 19.8 (4)       |
| C12  | 3110 (2)    | 8967.5 (17) | 6543.7 (5) | 23.2 (4)       |
| C13  | 1370 (3)    | 9101.3 (19) | 6559.0 (5) | 28.4 (5)       |
| C14  | 318 (3)     | 8259.2 (19) | 6437.2 (6) | 31.0 (5)       |
| C15  | 1004 (3)    | 7282 (2)    | 6296.3 (6) | 30.8 (5)       |
| C16  | 2747 (3)    | 7148.2 (18) | 6278.2 (5) | 24.5 (4)       |
| C17  | 7141 (2)    | 5473.5 (16) | 6157.5 (5) | 20.1 (4)       |
| C18  | 7242 (2)    | 5188.7 (17) | 5842.5 (5) | 22.7 (4)       |
| C19  | 7323 (3)    | 4808.2 (18) | 5459.0 (6) | 28.9 (5)       |
| C20  | 6551 (2)    | 5603.8 (16) | 5179.4 (5) | 22.0 (4)       |
| C21  | 6746 (3)    | 5361.8 (17) | 4805.0 (5) | 26.1 (4)       |
| C22  | 6083 (3)    | 6064.6 (18) | 4537.8 (6) | 31.6 (5)       |
| C23  | 5195 (3)    | 7011.2 (18) | 4641.0 (6) | 31.6 (5)       |
| C24  | 4969 (3)    | 7247.3 (17) | 5010.4 (6) | 29.0 (5)       |
| C25  | 5652 (3)    | 6550.4 (16) | 5278.9 (5) | 24.1 (4)       |
| N3   | 7312.1 (19) | 5187.8 (14) | 6831.1 (5) | 21.6 (3)       |
| N9   | 6274.9 (19) | 6849.6 (13) | 7010.5 (4) | 18.9 (3)       |
| C26  | 8333 (2)    | 1856.9 (16) | 6624.4 (5) | 18.7 (4)       |
| C28  | 9098 (2)    | 2622.0 (17) | 7245.2 (5) | 23.3 (4)       |
| C29  | 9142 (3)    | 2376.1 (18) | 7610.2 (5) | 28.4 (5)       |
| C30  | 8560 (3)    | 1327.4 (19) | 7741.6 (5) | 29.5 (5)       |
| C31  | 7944 (3)    | 546.2 (19)  | 7503.8 (5) | 26.6 (5)       |
| C32  | 7892 (2)    | 785.8 (17)  | 7121.5 (5) | 20.5 (4)       |
| C34  | 7640 (2)    | 840.4 (17)  | 6532.9 (5) | 18.7 (4)       |
| C35  | 8890 (2)    | 2822.2 (16) | 6396.3 (5) | 19.7 (4)       |
| C36  | 10788 (2)   | 2978.7 (16) | 6397.7 (5) | 19.1 (4)       |
| C37  | 11855 (3)   | 2118.9 (18) | 6288.3 (5) | 23.9 (4)       |

|     |             |             |            |          |
|-----|-------------|-------------|------------|----------|
| C38 | 13597 (3)   | 2273 (2)    | 6288.6 (5) | 29.2 (5) |
| C39 | 14273 (3)   | 3282 (2)    | 6401.9 (6) | 32.6 (5) |
| C40 | 13224 (2)   | 4136.8 (19) | 6515.3 (6) | 28.6 (5) |
| C41 | 11489 (2)   | 3990.5 (17) | 6510.4 (5) | 23.0 (4) |
| C42 | 7244 (2)    | 477.9 (16)  | 6166.4 (5) | 20.1 (4) |
| C43 | 6892 (2)    | 169.6 (16)  | 5863.5 (5) | 22.6 (4) |
| C44 | 6404 (3)    | -271.7 (17) | 5501.3 (5) | 28.5 (5) |
| C45 | 6279 (2)    | 599.6 (16)  | 5198.4 (5) | 23.4 (4) |
| C46 | 6942 (3)    | 373.0 (18)  | 4851.1 (6) | 28.8 (5) |
| C47 | 6782 (3)    | 1149 (2)    | 4565.5 (6) | 32.8 (5) |
| C48 | 5943 (3)    | 2143.7 (19) | 4626.5 (5) | 30.5 (5) |
| C49 | 5268 (3)    | 2373.1 (18) | 4970.7 (6) | 28.1 (5) |
| C50 | 5450 (3)    | 1607.6 (16) | 5255.5 (5) | 24.7 (4) |
| N27 | 8489.5 (19) | 1826.8 (13) | 7004.4 (4) | 19.2 (3) |
| N33 | 7362.1 (19) | 178.0 (14)  | 6838.8 (5) | 21.5 (3) |

**Table S27 Anisotropic Displacement Parameters ( $\text{\AA}^2 \times 10^3$ ) for 230885lt\_auto. The Anisotropic displacement factor exponent takes the form: -  $2\pi^2[h^2a^{*2}U_{11}+2hka^*b^*U_{12}+\dots]$ .**

| Atom | $U_{11}$  | $U_{22}$  | $U_{33}$  | $U_{23}$  | $U_{13}$ | $U_{12}$  |
|------|-----------|-----------|-----------|-----------|----------|-----------|
| C1   | 16.9 (9)  | 19.3 (10) | 20.1 (9)  | -1.1 (7)  | -1.0 (7) | -2.1 (7)  |
| C2   | 16.4 (9)  | 20.4 (10) | 20.0 (9)  | 0.7 (8)   | -1.0 (7) | 0.6 (8)   |
| C4   | 19.6 (9)  | 20.1 (10) | 22.9 (9)  | -0.2 (8)  | -0.7 (7) | -1.1 (8)  |
| C5   | 28.5 (11) | 24.4 (12) | 24.1 (11) | 3.0 (8)   | -2.6 (8) | -0.1 (9)  |
| C6   | 33.2 (12) | 32.7 (12) | 20.9 (10) | 0.9 (9)   | -0.5 (9) | 5.1 (10)  |
| C7   | 30.9 (11) | 25.6 (12) | 25.0 (10) | -6.2 (8)  | 2.6 (8)  | -3.0 (9)  |
| C8   | 24.2 (10) | 20.5 (10) | 25.9 (10) | -5.4 (8)  | 0.8 (8)  | -0.1 (8)  |
| C10  | 18.4 (9)  | 16.5 (9)  | 22.5 (9)  | 0.2 (8)   | 0.1 (7)  | -1.3 (8)  |
| C11  | 20.6 (9)  | 19.7 (10) | 19.2 (9)  | 4.7 (8)   | -0.3 (7) | 0.0 (8)   |
| C12  | 23.1 (10) | 21.9 (10) | 24.6 (10) | 3.8 (8)   | -0.2 (8) | 1.0 (8)   |
| C13  | 25.9 (10) | 31.1 (11) | 28.3 (10) | 9.6 (9)   | 4.2 (8)  | 8.6 (9)   |
| C14  | 20.2 (10) | 39.9 (13) | 32.9 (11) | 15.7 (10) | -0.1 (8) | 0.5 (9)   |
| C15  | 25.3 (11) | 37.0 (13) | 30.1 (11) | 13.2 (10) | -8.9 (8) | 11.3 (10) |

|     |               |           |           |           |          |               |
|-----|---------------|-----------|-----------|-----------|----------|---------------|
| C16 | 28.6 (10<br>) | 20.4 (10) | 24.4 (10) | 4.4 (8)   | -3.9 (8) | -2.4 (9)      |
| C17 | 19.3 (9)      | 16.6 (9)  | 24.3 (10) | 1.2 (8)   | -1.1 (7) | 0.1 (7)       |
| C18 | 24.7 (10<br>) | 19.2 (10) | 24.1 (10) | 1.9 (8)   | -1.0 (8) | 2.3 (8)       |
| C19 | 37.4 (12<br>) | 23.6 (11) | 25.6 (10) | -1.5 (9)  | -0.4 (9) | 7.0 (9)       |
| C20 | 20.2 (9)      | 22.8 (10) | 23.0 (9)  | -0.1 (8)  | -0.7 (7) | -2.0 (8)      |
| C21 | 27.5 (11<br>) | 26.1 (11) | 24.7 (10) | -3.7 (8)  | 0.5 (8)  | 1.5 (9)       |
| C22 | 38.0 (12<br>) | 35.7 (12) | 21.0 (10) | -0.7 (9)  | -0.6 (9) | 1.2 (10)      |
| C23 | 37.4 (12<br>) | 30.3 (11) | 27.1 (10) | 3.4 (9)   | -5.7 (9) | 2.2 (10)      |
| C24 | 31.7 (11<br>) | 23.6 (10) | 31.7 (11) | -2.8 (9)  | -5.8 (9) | 2.9 (9)       |
| C25 | 25.5 (10<br>) | 24.4 (10) | 22.4 (9)  | -3.8 (8)  | -1.4 (8) | 0.3 (8)       |
| N3  | 22.5 (8)      | 20.1 (8)  | 22.0 (8)  | 0.4 (7)   | -1.6 (6) | 0.4 (7)       |
| N9  | 18.2 (7)      | 18.5 (8)  | 19.8 (7)  | -1.3 (6)  | -1.2 (6) | -0.9 (6)      |
| C26 | 16.6 (9)      | 20.0 (10) | 19.5 (9)  | -0.2 (8)  | 0.3 (7)  | 2.2 (8)       |
| C28 | 22.7 (10<br>) | 21.7 (10) | 25.7 (10) | -4.4 (8)  | 0.3 (8)  | -0.6 (8)      |
| C29 | 31.3 (11<br>) | 30.3 (12) | 23.5 (10) | -7.2 (9)  | -0.8 (8) | 3.1 (9)       |
| C30 | 34.9 (12<br>) | 33.5 (12) | 20.0 (10) | 0.2 (9)   | 1.2 (9)  | 3.8 (10)      |
| C31 | 29.7 (11<br>) | 28.4 (12) | 21.7 (10) | 2.8 (8)   | 2.3 (8)  | 1.6 (9)       |
| C32 | 19.8 (9)      | 19.0 (10) | 22.6 (9)  | 1.1 (8)   | 3.0 (7)  | -0.2 (8)      |
| C34 | 16.6 (9)      | 18.6 (10) | 21.0 (9)  | -0.2 (8)  | 0.4 (7)  | 1.0 (7)       |
| C35 | 18.2 (9)      | 18.5 (9)  | 22.4 (9)  | 2.1 (8)   | -1.5 (7) | 0.3 (8)       |
| C36 | 19.3 (9)      | 20.5 (10) | 17.4 (8)  | 3.6 (7)   | -0.1 (7) | 0.0 (8)       |
| C37 | 28.9 (11<br>) | 23.3 (10) | 19.4 (9)  | 4.8 (8)   | 2.4 (8)  | 3.0 (9)       |
| C38 | 25.1 (10<br>) | 35.1 (12) | 27.3 (10) | 9.9 (9)   | 5.8 (8)  | 11.7 (10<br>) |
| C39 | 19.9 (10<br>) | 43.7 (14) | 34.3 (11) | 14.5 (10) | 0.0 (9)  | -<br>1.1 (10) |
| C40 | 23.8 (10<br>) | 29.4 (11) | 32.6 (11) | 8.2 (9)   | -3.7 (9) | -7.4 (9)      |
| C41 | 20.8 (9)      | 21.2 (10) | 26.8 (10) | 3.5 (8)   | -1.0 (8) | -1.6 (8)      |
| C42 | 20.6 (9)      | 16.5 (9)  | 23.3 (10) | 1.3 (8)   | -0.5 (7) | -0.1 (8)      |
| C43 | 25.8 (10<br>) | 16.2 (9)  | 25.6 (10) | 0.5 (8)   | -1.6 (8) | 0.4 (8)       |
| C44 | 37.1 (12<br>) | 21.8 (10) | 26.5 (10) | -2.6 (9)  | -8.6 (9) | -0.2 (9)      |

|     |                |           |           |          |          |            |
|-----|----------------|-----------|-----------|----------|----------|------------|
| C45 | 24.4 (10)<br>) | 23.8 (10) | 21.8 (9)  | -2.3 (8) | -3.6 (8) | -2.4 (8)   |
| C46 | 26.2 (10)<br>) | 30.3 (11) | 29.9 (11) | -5.6 (9) | -0.4 (9) | 2.0 (9)    |
| C47 | 32.6 (12)<br>) | 43.4 (13) | 22.4 (10) | -4.1 (9) | 2.9 (9)  | 5.0 (10) - |
| C48 | 34.9 (12)<br>) | 34.4 (12) | 22.3 (10) | 6.1 (9)  | -1.3 (8) | 6.8 (10) - |
| C49 | 30.3 (11)<br>) | 25.2 (11) | 28.8 (10) | 2.3 (9)  | -3.9 (8) | -1.5 (9)   |
| C50 | 28.0 (11)<br>) | 24.3 (10) | 21.9 (9)  | -0.9 (8) | 0.0 (8)  | -1.5 (8)   |
| N27 | 18.8 (8)       | 19.5 (8)  | 19.2 (7)  | -1.3 (6) | 0.4 (6)  | 1.8 (7)    |
| N33 | 23.9 (8)       | 19.3 (8)  | 21.3 (8)  | 1.1 (7)  | 0.7 (6)  | -1.3 (7)   |

**Table S28 Bond Lengths for 230885lt\_auto.**

| Atom | Atom | Length/Å  | Atom | Atom | Length/Å  |
|------|------|-----------|------|------|-----------|
| C1   | C2   | 1.371 (3) | C26  | C34  | 1.377 (3) |
| C1   | C10  | 1.491 (3) | C26  | C35  | 1.489 (3) |
| C1   | N9   | 1.385 (2) | C26  | N27  | 1.384 (2) |
| C2   | C17  | 1.434 (3) | C28  | C29  | 1.357 (3) |
| C2   | N3   | 1.381 (2) | C28  | N27  | 1.380 (2) |
| C4   | C5   | 1.419 (3) | C29  | C30  | 1.421 (3) |
| C4   | N3   | 1.329 (2) | C30  | C31  | 1.364 (3) |
| C4   | N9   | 1.395 (2) | C31  | C32  | 1.417 (3) |
| C5   | C6   | 1.362 (3) | C32  | N27  | 1.401 (2) |
| C6   | C7   | 1.424 (3) | C32  | N33  | 1.326 (3) |
| C7   | C8   | 1.354 (3) | C34  | C42  | 1.433 (3) |
| C8   | N9   | 1.380 (2) | C34  | N33  | 1.382 (2) |
| C10  | C11  | 1.518 (3) | C35  | C36  | 1.516 (3) |
| C11  | C12  | 1.393 (3) | C36  | C37  | 1.391 (3) |
| C11  | C16  | 1.392 (3) | C36  | C41  | 1.395 (3) |
| C12  | C13  | 1.390 (3) | C37  | C38  | 1.393 (3) |
| C13  | C14  | 1.382 (3) | C38  | C39  | 1.385 (3) |
| C14  | C15  | 1.389 (3) | C39  | C40  | 1.382 (3) |
| C15  | C16  | 1.392 (3) | C40  | C41  | 1.387 (3) |
| C17  | C18  | 1.195 (3) | C42  | C43  | 1.192 (3) |
| C18  | C19  | 1.465 (3) | C43  | C44  | 1.468 (3) |
| C19  | C20  | 1.521 (3) | C44  | C45  | 1.519 (3) |
| C20  | C21  | 1.397 (3) | C45  | C46  | 1.392 (3) |
| C20  | C25  | 1.387 (3) | C45  | C50  | 1.391 (3) |
| C21  | C22  | 1.388 (3) | C46  | C47  | 1.398 (3) |

**Table S28 Bond Lengths for 230885lt\_auto.**

| Atom | Atom | Length/Å  | Atom | Atom | Length/Å  |
|------|------|-----------|------|------|-----------|
| C22  | C23  | 1.387 (3) | C47  | C48  | 1.383 (3) |
| C23  | C24  | 1.381 (3) | C48  | C49  | 1.386 (3) |
| C24  | C25  | 1.393 (3) | C49  | C50  | 1.389 (3) |

**Table S29 Bond Angles for 230885lt\_auto.**

| Atom | Atom | Atom | Angle/°     | Atom | Atom | Atom | Angle/°     |
|------|------|------|-------------|------|------|------|-------------|
| C2   | C1   | C10  | 131.71 (17) | C34  | C26  | C35  | 132.19 (17) |
| C2   | C1   | N9   | 104.52 (16) | C34  | C26  | N27  | 104.64 (16) |
| N9   | C1   | C10  | 123.76 (17) | N27  | C26  | C35  | 123.15 (17) |
| C1   | C2   | C17  | 124.60 (17) | C29  | C28  | N27  | 118.47 (19) |
| C1   | C2   | N3   | 112.67 (16) | C28  | C29  | C30  | 120.7 (2)   |
| N3   | C2   | C17  | 122.71 (18) | C31  | C30  | C29  | 120.75 (19) |
| N3   | C4   | C5   | 130.68 (19) | C30  | C31  | C32  | 119.4 (2)   |
| N3   | C4   | N9   | 111.44 (16) | N27  | C32  | C31  | 117.89 (18) |
| N9   | C4   | C5   | 117.88 (17) | N33  | C32  | C31  | 130.91 (19) |
| C6   | C5   | C4   | 119.2 (2)   | N33  | C32  | N27  | 111.21 (16) |
| C5   | C6   | C7   | 120.98 (19) | C26  | C34  | C42  | 125.40 (18) |
| C8   | C7   | C6   | 120.35 (19) | C26  | C34  | N33  | 112.23 (16) |
| C7   | C8   | N9   | 118.71 (19) | N33  | C34  | C42  | 122.38 (18) |
| C1   | C10  | C11  | 113.75 (16) | C26  | C35  | C36  | 112.85 (16) |
| C12  | C11  | C10  | 119.90 (18) | C37  | C36  | C35  | 120.73 (18) |
| C16  | C11  | C10  | 120.90 (18) | C37  | C36  | C41  | 119.02 (18) |
| C16  | C11  | C12  | 119.18 (18) | C41  | C36  | C35  | 120.25 (17) |
| C13  | C12  | C11  | 120.5 (2)   | C36  | C37  | C38  | 120.3 (2)   |
| C14  | C13  | C12  | 120.1 (2)   | C39  | C38  | C37  | 119.9 (2)   |
| C13  | C14  | C15  | 119.86 (19) | C40  | C39  | C38  | 120.19 (19) |
| C14  | C15  | C16  | 120.2 (2)   | C39  | C40  | C41  | 119.9 (2)   |
| C11  | C16  | C15  | 120.2 (2)   | C40  | C41  | C36  | 120.6 (2)   |
| C18  | C17  | C2   | 176.7 (2)   | C43  | C42  | C34  | 179.0 (2)   |
| C17  | C18  | C19  | 178.0 (2)   | C42  | C43  | C44  | 176.3 (2)   |
| C18  | C19  | C20  | 114.86 (17) | C43  | C44  | C45  | 114.63 (17) |
| C21  | C20  | C19  | 118.25 (17) | C46  | C45  | C44  | 119.73 (18) |
| C25  | C20  | C19  | 123.08 (17) | C50  | C45  | C44  | 121.36 (17) |
| C25  | C20  | C21  | 118.66 (18) | C50  | C45  | C46  | 118.86 (18) |
| C22  | C21  | C20  | 120.71 (19) | C45  | C46  | C47  | 120.4 (2)   |
| C23  | C22  | C21  | 120.03 (19) | C48  | C47  | C46  | 119.90 (19) |
| C24  | C23  | C22  | 119.7 (2)   | C47  | C48  | C49  | 120.1 (2)   |
| C23  | C24  | C25  | 120.3 (2)   | C48  | C49  | C50  | 119.9 (2)   |



**Table S29 Bond Angles for 230885lt\_auto.**

| Atom | Atom | Atom | Angle/°     | Atom | Atom | Atom | Angle/°     |
|------|------|------|-------------|------|------|------|-------------|
| C20  | C25  | C24  | 120.54 (18) | C49  | C50  | C45  | 120.80 (18) |
| C4   | N3   | C2   | 104.22 (16) | C26  | N27  | C32  | 107.16 (15) |
| C1   | N9   | C4   | 107.14 (15) | C28  | N27  | C26  | 130.06 (17) |
| C8   | N9   | C1   | 129.99 (17) | C28  | N27  | C32  | 122.78 (16) |
| C8   | N9   | C4   | 122.86 (16) | C32  | N33  | C34  | 104.76 (16) |

**Table S30 Torsion Angles for 230885lt\_auto.**

| A   | B   | C   | D   | Angle/°     | A   | B   | C   | D   | Angle/°     |
|-----|-----|-----|-----|-------------|-----|-----|-----|-----|-------------|
| C1  | C2  | N3  | C4  | 0.6 (2)     | C26 | C34 | N33 | C32 | -0.3 (2)    |
| C1  | C10 | C11 | C12 | 118.78 (19) | C26 | C35 | C36 | C37 | 56.7 (2)    |
| C1  | C10 | C11 | C16 | -59.7 (2)   | C26 | C35 | C36 | C41 | 123.11 (19) |
| C2  | C1  | C10 | C11 | 107.2 (2)   | C28 | C29 | C30 | C31 | 0.0 (3)     |
| C2  | C1  | N9  | C4  | 0.0 (2)     | C29 | C28 | N27 | C26 | 178.97 (19) |
| C2  | C1  | N9  | C8  | 179.62 (18) | C29 | C28 | N27 | C32 | 1.1 (3)     |
| C4  | C5  | C6  | C7  | -0.2 (3)    | C29 | C30 | C31 | C32 | 0.2 (3)     |
| C5  | C4  | N3  | C2  | 179.7 (2)   | C30 | C31 | C32 | N27 | 0.2 (3)     |
| C5  | C4  | N9  | C1  | 179.88 (17) | C30 | C31 | C32 | N33 | 180.0 (2)   |
| C5  | C4  | N9  | C8  | 0.4 (3)     | C31 | C32 | N27 | C26 | 179.17 (17) |
| C5  | C6  | C7  | C8  | -0.2 (3)    | C31 | C32 | N27 | C28 | -0.9 (3)    |
| C6  | C7  | C8  | N9  | 0.7 (3)     | C31 | C32 | N33 | C34 | -179.2 (2)  |
| C7  | C8  | N9  | C1  | 179.53 (19) | C34 | C26 | C35 | C36 | -111.0 (2)  |
| C7  | C8  | N9  | C4  | -0.9 (3)    | C34 | C26 | N27 | C28 | 179.52 (18) |
| C10 | C1  | C2  | C17 | -1.0 (3)    | C34 | C26 | N27 | C32 | 0.44 (19)   |
| C10 | C1  | C2  | N3  | 179.34 (18) | C35 | C26 | C34 | C42 | -1.5 (3)    |
| C10 | C1  | N9  | C4  | 179.07 (16) | C35 | C26 | C34 | N33 | 178.17 (18) |
| C10 | C1  | N9  | C8  | -1.3 (3)    | C35 | C26 | N27 | C28 | 2.0 (3)     |
| C10 | C11 | C12 | C13 | 177.67 (17) | C35 | C26 | N27 | C32 | 178.05 (17) |
| C10 | C11 | C16 | C15 | 177.21 (18) | C35 | C36 | C37 | C38 | 179.64 (17) |
| C11 | C12 | C13 | C14 | 0.1 (3)     | C35 | C36 | C41 | C40 | 179.48 (18) |
| C12 | C11 | C16 | C15 | -1.2 (3)    | C36 | C37 | C38 | C39 | 0.7 (3)     |
| C12 | C13 | C14 | C15 | -0.6 (3)    | C37 | C36 | C41 | C40 | -0.3 (3)    |
| C13 | C14 | C15 | C16 | 0.1 (3)     | C37 | C38 | C39 | C40 | 0.1 (3)     |
| C14 | C15 | C16 | C11 | 0.8 (3)     | C38 | C39 | C40 | C41 | -1.0 (3)    |

**Table S30 Torsion Angles for 230885lt\_auto.**

| A   | B   | C   | D   | Angle/°     | A   | B   | C   | D   | Angle/°     |
|-----|-----|-----|-----|-------------|-----|-----|-----|-----|-------------|
| C16 | C11 | C12 | C13 | 0.8 (3)     | C39 | C40 | C41 | C36 | 1.1 (3)     |
| C17 | C2  | N3  | C4  | 177.83 (18) | C41 | C36 | C37 | C38 | -0.6 (3)    |
| C18 | C19 | C20 | C21 | 172.92 (19) | C42 | C34 | N33 | C32 | 179.44 (17) |
| C18 | C19 | C20 | C25 | -7.6 (3)    | C43 | C44 | C45 | C46 | 136.6 (2)   |
| C19 | C20 | C21 | C22 | 179.34 (19) | C43 | C44 | C45 | C50 | -46.1 (3)   |
| C19 | C20 | C25 | C24 | 179.83 (19) | C44 | C45 | C46 | C47 | 177.59 (19) |
| C20 | C21 | C22 | C23 | -0.9 (3)    | C44 | C45 | C50 | C49 | 176.64 (18) |
| C21 | C20 | C25 | C24 | -0.4 (3)    | C45 | C46 | C47 | C48 | -0.7 (3)    |
| C21 | C22 | C23 | C24 | -0.3 (3)    | C46 | C45 | C50 | C49 | 0.7 (3)     |
| C22 | C23 | C24 | C25 | 1.1 (3)     | C46 | C47 | C48 | C49 | 0.2 (3)     |
| C23 | C24 | C25 | C20 | -0.8 (3)    | C47 | C48 | C49 | C50 | 0.6 (3)     |
| C25 | C20 | C21 | C22 | 1.2 (3)     | C48 | C49 | C50 | C45 | -1.1 (3)    |
| N3  | C4  | C5  | C6  | 179.8 (2)   | C50 | C45 | C46 | C47 | 0.2 (3)     |
| N3  | C4  | N9  | C1  | 0.4 (2)     | N27 | C26 | C34 | C42 | 179.81 (17) |
| N3  | C4  | N9  | C8  | 179.28 (17) | N27 | C26 | C34 | N33 | -0.1 (2)    |
| N9  | C1  | C2  | C17 | 178.03 (17) | N27 | C26 | C35 | C36 | 67.0 (2)    |
| N9  | C1  | C2  | N3  | -0.3 (2)    | N27 | C28 | C29 | C30 | -0.6 (3)    |
| N9  | C1  | C10 | C11 | -71.6 (2)   | N27 | C32 | N33 | C34 | 0.5 (2)     |
| N9  | C4  | C5  | C6  | 0.1 (3)     | N33 | C32 | N27 | C26 | -0.6 (2)    |
| N9  | C4  | N3  | C2  | -0.6 (2)    | N33 | C32 | N27 | C28 | 179.33 (17) |

**Table S31 Hydrogen Atom Coordinates ( $\text{\AA} \times 10^4$ ) and Isotropic Displacement Parameters ( $\text{\AA}^2 \times 10^3$ ) for 230885lt\_auto.**

| Atom | x       | y       | z       | U(eq) |
|------|---------|---------|---------|-------|
| H5   | 7403.66 | 4889.24 | 7588.77 | 31    |
| H6   | 6532.9  | 6231.66 | 8004.29 | 35    |
| H7   | 5499.78 | 7972.68 | 7797.3  | 33    |
| H8   | 5368.79 | 8359.77 | 7174.01 | 28    |
| H10A | 6093.44 | 7731.79 | 6146.5  | 23    |
| H10B | 6244.2  | 8524.51 | 6499.35 | 23    |
| H12  | 3826.7  | 9548.79 | 6628.24 | 28    |
| H13  | 902.78  | 9773.04 | 6653.31 | 34    |
| H14  | -871.09 | 8348.54 | 6449.83 | 37    |
| H15  | 281.87  | 6702.79 | 6211.99 | 37    |

**Table S31 Hydrogen Atom Coordinates ( $\text{\AA}\times 10^4$ ) and Isotropic Displacement Parameters ( $\text{\AA}^2\times 10^3$ ) for 230885lt\_auto.**

| Atom | <i>x</i> | <i>y</i> | <i>z</i> | U(eq) |
|------|----------|----------|----------|-------|
| H16  | 3210.95  | 6482.29  | 6178.84  | 29    |
| H19A | 6738.07  | 4080.75  | 5440.44  | 35    |
| H19B | 8520.66  | 4685.02  | 5393.04  | 35    |
| H21  | 7340.11  | 4709.06  | 4732.64  | 31    |
| H22  | 6236.8   | 5897.17  | 4284.05  | 38    |
| H23  | 4743.87  | 7495.03  | 4458.53  | 38    |
| H24  | 4345.03  | 7888.48  | 5081.73  | 35    |
| H25  | 5502.03  | 6724.65  | 5532.27  | 29    |
| H28  | 9476.44  | 3325.51  | 7157.47  | 28    |
| H29  | 9566.94  | 2910.7   | 7779.77  | 34    |
| H30  | 8600.2   | 1168.88  | 7998.04  | 35    |
| H31  | 7553.62  | -152.04  | 7593.56  | 32    |
| H35A | 8348.37  | 3509.55  | 6490.74  | 24    |
| H35B | 8504.66  | 2709.68  | 6139.37  | 24    |
| H37  | 11394.07 | 1423.71  | 6213.11  | 29    |
| H38  | 14320.8  | 1686.1   | 6211.25  | 35    |
| H39  | 15460.85 | 3386.85  | 6401.53  | 39    |
| H40  | 13691.51 | 4823.92  | 6596.5   | 34    |
| H41  | 10771.35 | 4584.39  | 6584.52  | 28    |
| H44A | 5297.71  | -648.12  | 5525.34  | 34    |
| H44B | 7239.09  | -842.1   | 5426.14  | 34    |
| H46  | 7508.25  | -313.28  | 4807.88  | 35    |
| H47  | 7248.14  | 992.97   | 4329.77  | 39    |
| H48  | 5829.39  | 2670.15  | 4432.37  | 37    |
| H49  | 4682.27  | 3053.16  | 5011.79  | 34    |
| H50  | 5002.48  | 1774.6   | 5492.08  | 30    |

## Experimental

Single crystals of  $\text{C}_{46}\text{H}_{36}\text{N}_4$  [230885lt\_auto] were [1]. A suitable crystal was selected and [2] on a **XtaLAB Synergy R, DW system, HyPix-Arc 150** diffractometer. The crystal was kept at 99.8(5) K during data collection. Using Olex2 [1], the structure was solved with the SHELXT [2] structure solution program using Intrinsic Phasing and refined with the SHELXL [3] refinement package using Least Squares minimisation.

1. Dolomanov, O.V., Bourhis, L.J., Gildea, R.J, Howard, J.A.K. & Puschmann, H. (2009), *J. Appl. Cryst.* 42, 339-341.
2. Sheldrick, G.M. (2015). *Acta Cryst.* A71, 3-8.

3. Sheldrick, G.M. (2015). Acta Cryst. C71, 3-8.

### Crystal structure determination of [230885]t\_auto

**Crystal Data** for  $C_{46}H_{36}N_4$  ( $M=644.79$  g/mol): orthorhombic, space group  $P2_12_12_1$  (no. 19),  $a = 7.92700(10)$  Å,  $b = 11.98670(10)$  Å,  $c = 36.2753(4)$  Å,  $V = 3446.83(6)$  Å<sup>3</sup>,  $Z = 4$ ,  $T = 99.8(5)$  K,  $\mu(\text{Cu K}\alpha) = 0.563$  mm<sup>-1</sup>,  $D_{\text{calc}} = 1.243$  g/cm<sup>3</sup>, 21562 reflections measured ( $4.872^\circ \leq 2\Theta \leq 149.538^\circ$ ), 6582 unique ( $R_{\text{int}} = 0.0303$ ,  $R_{\text{sigma}} = 0.0311$ ) which were used in all calculations. The final  $R_1$  was 0.0330 ( $I > 2\sigma(I)$ ) and  $wR_2$  was 0.0830 (all data).

### Refinement model description

Number of restraints - 0, number of constraints - unknown.

#### Details:

1. Twinned data refinement

Scales: 1.0(5)

-0.0(5)

2. Fixed Uiso

At 1.2 times of:

All C(H) groups, All C(H,H) groups

3.a Secondary CH2 refined with riding coordinates:

C10 (H10A,H10B), C19 (H19A,H19B), C35 (H35A,H35B), C44 (H44A,H44B)

3.b Aromatic/amide H refined with riding coordinates:

C5 (H5), C6 (H6), C7 (H7), C8 (H8), C12 (H12), C13 (H13), C14 (H14), C15 (H15),

C16 (H16), C21 (H21), C22 (H22), C23 (H23), C24 (H24), C25 (H25), C28 (H28), C29 (H29),

C30 (H30), C31 (H31), C37 (H37), C38 (H38), C39 (H39), C40 (H40), C41 (H41),

C46 (H46), C47 (H47), C48 (H48), C49 (H49), C50 (H50)

This report has been created with Olex2, compiled on 2023.08.24 svn.re1ec1418 for OlexSys. Please [let us know](#) if there are any errors or if you would like to have additional features.
